# Supplementary material for: Plant recognition by Trichoderma Harzianum elicits upregulation of a novel secondary metabolite cluster required for colonization
Source: Sci Rep. 2026 Jan 20;16:3945. doi: 10.1038/s41598-025-33935-2 (PMC12855858; doi:10.1038/s41598-025-33935-2)
Supplement: Supplementary file 2 — Supplementary Material 2 [file 41598_2025_33935_MOESM2_ESM.xlsx]

## Sheet: differential expression
Genes differentially regulated in T. harzianum B97 between axenic growth and recognition of the soybean plant
p-value <0.01 and >2fold regulation
	genomic location
Triha ID	scaffold	start	fold regulation	Gene name	Description	predicted function
Triha_72809	1	113471	0.4668	-	-	-
Triha_12029	1	167728	0.47064	-	-	-
Triha_502174	1	385923	0.418196	con-13	-	Orthologues of Neurospora crassa con genes involved in asexual reproduction
Triha_502263	1	694508	2.12331	-	-	-
Triha_12516	1	2106325	0.244029	-	-	-
Triha_193972	1	2322355	2.41749	-	-	-
Triha_489519	1	2452549	3.64433	-	-	-
Triha_74494	2	36450	2.26197	-	-	-
Triha_503468	2	66139	0.451842	-	-	-
Triha_134143	2	1821133	3.08726	-	-	-
Triha_478216	2	1824588	3.71172	-	Mitochondrial succinate/fumarate antiporter	-
Triha_504126	2	2029810	2.55382	-	Hydroxysteroid 17-beta dehydrogenase 11	-
Triha_490828	2	2136432	3.18761	-	MSF transporter	-
Triha_36398	2	2272438	32.3287	-	no domains	-
Triha_76871	2	2274592	21.2373	-	ferric reductase like, 6 tm	-
Triha_544874	2	2686662	2.71118	-	-	-
Triha_75338	2	2691269	4.27484	-	-	-
Triha_491231	2	3240181	0.249263	-	RhoGEF	Guanine nucleotide exchange factors (GEFs)
Triha_2255	2	3453323	3.2022	-	isocitrate lyase	-
Triha_312954	2	3516990	0.434183	-	-	-
Triha_478776	2	3613315	5.82464	-	-	-
Triha_77454	3	160993	2.33774	-	ADH1	-
Triha_478943	3	197438	2.52439	-	-	Chromatin and histone modification
Triha_505022	3	617501	4.55953	-	-	-
Triha_78900	3	863179	3.61258	-	-	-
Triha_77316	3	1493020	4.38867	-	-	-
Triha_355214	3	2101900	0.199538	-	-	-
Triha_506740	4	2231381	2.14018	-	-	-
Triha_4170	4	2458387	2.54777	-	-	-
Triha_398864	5	192572	5.15492	-	conserved secreted protein	-
Triha_406907	5	1189638	0.437415	-	-	-
Triha_82529	5	2217994	0.489	-	-	-
Triha_552903	5	2338692	0.423364	-	-	-
Triha_507821	5	2616700	2.4225	-	-	-
Triha_83588	5	2647890	30.7864	-	Copper transporter	-
Triha_507840	5	2649276	3.77396	-	-	-
Triha_507858	6	22175	17.048	nit6	nitrite reductase NirB	Nitrogen metabolism
Triha_507859	6	26753	4.07086	nit3	Nitrate reductase	Nitrogen metabolism
Triha_507875	6	76866	0.435924	-	-	-
Triha_494816	6	516047	0.337441	-	-	-
Triha_494872	6	658583	4.00333	-	esterase/lipase	-
Triha_85832	6	1926641	2.68566	-	-	-
Triha_438534	6	2108554	3.61258	-	-	-
Triha_439414	6	2293699	4.74744	-	-	-
Triha_5840	7	18515	0.275416	-	-	-
Triha_144183	7	301687	0.392083	-	-	-
Triha_5927	7	303681	0.469936	-	-	-
Triha_508721	7	306561	0.322306	-	-	-
Triha_86988	7	462862	0.256836	-	-	-
Triha_6146	7	927392	2.02139	-	-	-
Triha_509305	7	2126448	4.86467	-	-	-
Triha_496318	7	2387325	0.333333	-	-	-
Triha_89055	8	49230	4.9674	-	-	-
Triha_88832	8	52347	5.89687	-	putative protein kinase, potentially RIO kinase	-
Triha_531912	8	69385	0.435802	-	Transcription factor MEIS1 and related HOX domain proteins	-
Triha_6792	8	639197	0.189093	-	-	-
Triha_88572	8	832172	4.19894	-	-	-
Triha_509593	8	850710	0.42472	Endo T/chi18-rel1/Eng18A	candidate b-glycosidase related to chitinase	Glycoside hydrolase
Triha_6915	8	1060492	2.06422	-	-	-
Triha_6953	8	1195874	0.435497	-	unique protein	-
Triha_90623	9	1380266	0.276944	-	-	-
Triha_538596	10	157788	0.409247	-	-	-
Triha_510360	10	456491	0.333333	-	-	-
Triha_18594	10	664181	5.28782	-	-	-
Triha_91371	10	711803	0.497565	-	-	-
Triha_497584	10	795974	2.8022	-	-	-
Triha_522654	11	481059	0.26933	-	-	-
Triha_522655	11	488219	0.276197	-	Proteins containing the FAD binding domain	-
Triha_228055	11	905100	2.74265	-	-	-
Triha_511113	11	1319969	2.72994	-	-	-
Triha_92878	11	1328809	0.125536	-	-	-
Triha_122678	12	523776	4.01946	-	-	-
Triha_523328	12	1232713	2.1036	-	-	-
Triha_540691	13	328780	0.460842	-	-	-
Triha_498937	13	512899	0.333333	-	-	-
Triha_523651	13	979086	3.10547	tps11	Terpenoid synthase	-
Triha_9277	14	903715	2.24259	-	-	-
Triha_485966	14	906601	2.75635	-	Permease: transport of acetate ions ??(plasma membrane)	-
Triha_523955	14	950471	0.392348	-	-	-
Triha_541862	15	605918	0.18868	-	-	-
Triha_500211	18	221413	0.271553	-	-	-
Triha_98848	22	146421	0.455114	-	-	protease
Triha_323871	23	274895	1589.09	-	PCA cluster	-
Triha_513501	23	276189	513.462	-	PCA cluster	-
Triha_513502	23	277194	689.615	-	PCA cluster	-
Triha_99174	23	279621	2682.9	-	PCA cluster	-
Triha_513504	23	282385	125.98	-	PCA cluster	-
Triha_513505	23	283067	76.6329	-	PCA cluster	-
Triha_513506	23	284607	65.2823	-	PCA cluster	-
Triha_487512	24	54295	2.82305	-	-	-
Triha_99636	24	293710	4.25648	-	-	-
Triha_487619	25	3736	0.351165	-	-	-
Triha_10918	25	271264	2.13522	-	-	-
Triha_21360	26	29300	0.384907	-	-	-
Triha_155805	26	153181	2.4697	-	-	-
Triha_546993	26	165310	2.75018	-	-	-
Triha_549495	32	7311	3	-	-	-
Triha_488218	32	105904	0.271208	-	-	-
Triha_101265	32	113749	0.20166	-	-	-
Triha_525965	35	27554	2.19532	-	-	-
Triha_501913	39	25993	3.6152	-	-	-
Triha_502087	124	1426	0.410405	-	-	-

## Sheet: Functional categories
Functional category analysis of all genes with statistically significant regulation (p-value <0.01)
FUNCTIONAL CATEGORY	abs SET	rel SET	genes SET	abs GENOME	rel GENOME	rel SET/rel GENOME	P-VALUE
01 METABOLISM	116	43.2	TRIATDRAFT_210728 TRIATDRAFT_233016 TRIATDRAFT_261131 TRIATDRAFT_254530 TRIATDRAFT_297210 TRIATDRAFT_297256 TRIATDRAFT_297323 TRIATDRAFT_164996 TRIATDRAFT_157321 TRIATDRAFT_212102 TRIATDRAFT_82756 TRIATDRAFT_50821 TRIATDRAFT_144243 TRIATDRAFT_315240 TRIATDRAFT_297484 TRIATDRAFT_146607 TRIATDRAFT_262121 TRIATDRAFT_49527 TRIATDRAFT_49607 TRIATDRAFT_143748 TRIATDRAFT_255242 TRIATDRAFT_315645 TRIATDR…	3729	31.5	1.37142857142857	2.99802526622983e-05
01.01 amino acid metabolism	21	7.83	TRIATDRAFT_297256 TRIATDRAFT_164996 TRIATDRAFT_157321 TRIATDRAFT_50821 TRIATDRAFT_144243 TRIATDRAFT_146607 TRIATDRAFT_49607 TRIATDRAFT_281288 TRIATDRAFT_237038 TRIATDRAFT_291159 TRIATDRAFT_292305 TRIATDRAFT_87687 TRIATDRAFT_299749 TRIATDRAFT_38111 TRIATDRAFT_35395 TRIATDRAFT_148985 TRIATDRAFT_319832 TRIATDRAFT_147737 TRIATDRAFT_41966 TRIATDRAFT_155802 TRIATDRAFT_302945	540	4.57	1.71334792122538	0.0113358997327541
01.01.03 assimilation of ammonia, metabolism of the glutamate group	4	1.49	TRIATDRAFT_297256 TRIATDRAFT_237038 TRIATDRAFT_291159 TRIATDRAFT_302945	103	0.87	1.71264367816092	0.205834566283652
01.01.03.02 metabolism of glutamate	2	0.74	TRIATDRAFT_237038 TRIATDRAFT_302945	56	0.47	1.57446808510638	0.363873506025635
01.01.03.02.01 biosynthesis of glutamate	1	0.37	TRIATDRAFT_237038	36	0.30	1.23333333333333	0.562711483978347
01.01.03.05 metabolism of arginine	3	1.11	TRIATDRAFT_297256 TRIATDRAFT_237038 TRIATDRAFT_302945	39	0.33	3.36363636363636	0.0579580642251802
01.01.03.05.01 biosynthesis of arginine	3	1.11	TRIATDRAFT_297256 TRIATDRAFT_237038 TRIATDRAFT_302945	27	0.22	5.04545454545455	0.0225822762995294
01.01.03.05.02 degradation of arginine	1	0.37	TRIATDRAFT_297256	8	0.06	6.16666666666667	0.167725766595485
01.01.05 metabolism of urea cycle, creatine and polyamines	4	1.49	TRIATDRAFT_297256 TRIATDRAFT_237038 TRIATDRAFT_299749 TRIATDRAFT_302945	46	0.38	3.92105263157895	0.0200301747136011
01.01.05.03 metabolism of urea (urea cycle)	3	1.11	TRIATDRAFT_297256 TRIATDRAFT_299749 TRIATDRAFT_302945	28	0.23	4.82608695652174	0.0248781313474314
01.01.06 metabolism of the aspartate family	5	1.86	TRIATDRAFT_297256 TRIATDRAFT_281288 TRIATDRAFT_299749 TRIATDRAFT_319832 TRIATDRAFT_147737	119	1.00	1.86	0.133716889318098
01.01.06.01 metabolism of aspartate	2	0.74	TRIATDRAFT_297256 TRIATDRAFT_281288	22	0.18	4.11111111111111	0.0879727690789912
01.01.06.01.01 biosynthesis of aspartate	1	0.37	TRIATDRAFT_281288	9	0.07	5.28571428571429	0.186615459562321
01.01.06.01.02 degradation of aspartate	1	0.37	TRIATDRAFT_281288	15	0.12	3.08333333333333	0.291312527376529
01.01.06.04 metabolism of threonine	1	0.37	TRIATDRAFT_147737	14	0.11	3.36363636363636	0.274845712510647
01.01.06.04.02 degradation of threonine	1	0.37	TRIATDRAFT_147737	8	0.06	6.16666666666667	0.167725766595485
01.01.06.06 metabolism of lysine	2	0.74	TRIATDRAFT_299749 TRIATDRAFT_319832	43	0.36	2.05555555555556	0.254996962539073
01.01.06.06.01 biosynthesis of lysine	2	0.74	TRIATDRAFT_299749 TRIATDRAFT_319832	24	0.20	3.7	0.10209965598389
01.01.06.06.01.01 diaminopimelic acid pathway	1	0.37	TRIATDRAFT_299749	11	0.09	4.11111111111111	0.223122972174477
01.01.06.06.01.03 aminoadipic acid pathway	1	0.37	TRIATDRAFT_319832	10	0.08	4.625	0.20507798660876
01.01.09 metabolism of the cysteine - aromatic group	4	1.49	TRIATDRAFT_50821 TRIATDRAFT_49607 TRIATDRAFT_292305 TRIATDRAFT_38111	208	1.76	0.846590909090909	1
01.01.09.01 metabolism of glycine	1	0.37	TRIATDRAFT_50821	30	0.25	1.48	0.497984516272143
01.01.09.01.01 biosynthesis of glycine	1	0.37	TRIATDRAFT_50821	24	0.20	1.85	0.423717688657033
01.01.09.04 metabolism of phenylalanine	1	0.37	TRIATDRAFT_292305	60	0.50	0.74	1
01.01.09.04.02 degradation of phenylalanine	1	0.37	TRIATDRAFT_292305	30	0.25	1.48	0.497984516272143
01.01.09.05 metabolism of tyrosine	1	0.37	TRIATDRAFT_292305	46	0.38	0.973684210526316	1
01.01.09.05.02 degradation of tyrosine	1	0.37	TRIATDRAFT_292305	18	0.15	2.46666666666667	0.338510987342341
01.01.09.06 metabolism of tryptophan	1	0.37	TRIATDRAFT_38111	39	0.33	1.12121212121212	0.591885553374384
01.01.09.06.02 degradation of tryptophan	1	0.37	TRIATDRAFT_38111	12	0.10	3.7	0.240759824648618
01.01.11 metabolism of the pyruvate family (alanine, isoleucine, leucine, valine) and D-alanine	6	2.23	TRIATDRAFT_157321 TRIATDRAFT_144243 TRIATDRAFT_146607 TRIATDRAFT_35395 TRIATDRAFT_319832 TRIATDRAFT_155802	66	0.55	4.05454545454545	0.0037459454588551
01.01.11.02 metabolism of isoleucine	3	1.11	TRIATDRAFT_157321 TRIATDRAFT_144243 TRIATDRAFT_146607	31	0.26	4.26923076923077	0.0324902172964724
01.01.11.02.01 biosynthesis of isoleucine	3	1.11	TRIATDRAFT_157321 TRIATDRAFT_144243 TRIATDRAFT_146607	21	0.17	6.52941176470588	0.0113418651292094
01.01.11.02.02 degradation of isoleucine	1	0.37	TRIATDRAFT_157321	13	0.11	3.36363636363636	0.257997741201835
01.01.11.03 metabolism of valine	3	1.11	TRIATDRAFT_157321 TRIATDRAFT_144243 TRIATDRAFT_146607	25	0.21	5.28571428571429	0.0183540513940925
01.01.11.03.01 biosynthesis of valine	3	1.11	TRIATDRAFT_157321 TRIATDRAFT_144243 TRIATDRAFT_146607	15	0.12	9.25	0.00428887788070298
01.01.11.03.02 degradation of valine	1	0.37	TRIATDRAFT_157321	14	0.11	3.36363636363636	0.274845712510647
01.01.11.04 metabolism of leucine	4	1.49	TRIATDRAFT_157321 TRIATDRAFT_144243 TRIATDRAFT_146607 TRIATDRAFT_35395	36	0.30	4.96666666666667	0.00861698899577486
01.01.11.04.01 biosynthesis of leucine	4	1.49	TRIATDRAFT_157321 TRIATDRAFT_144243 TRIATDRAFT_146607 TRIATDRAFT_35395	24	0.20	7.45	0.00192236218391916
01.01.11.04.02 degradation of leucine	1	0.37	TRIATDRAFT_157321	20	0.16	2.3125	0.368223292519494
01.02 nitrogen, sulfur and selenium metabolism	12	4.47	TRIATDRAFT_157321 TRIATDRAFT_305582 TRIATDRAFT_237038 TRIATDRAFT_256104 TRIATDRAFT_291159 TRIATDRAFT_257930 TRIATDRAFT_37606 TRIATDRAFT_33283 TRIATDRAFT_295408 TRIATDRAFT_41966 TRIATDRAFT_259826_b TRIATDRAFT_48067	287	2.42	1.84710743801653	0.0307379539731173
01.02.02 nitrogen metabolism	3	1.11	TRIATDRAFT_157321 TRIATDRAFT_257930 TRIATDRAFT_259826_b	68	0.57	1.94736842105263	0.200133984075982
01.02.02.09 catabolism of nitrogenous compounds	2	0.74	TRIATDRAFT_257930 TRIATDRAFT_259826_b	37	0.31	2.38709677419355	0.204565507528697
01.02.02.09.05 cyanate catabolism	1	0.37	TRIATDRAFT_259826_b	1	0.00	0	0.0226811103588355
01.02.03 sulfur metabolism	1	0.37	TRIATDRAFT_37606	16	0.13	2.84615384615385	0.307406777242057
01.02.07 regulation of nitrogen, sulfur and selenium metabolism	2	0.74	TRIATDRAFT_33283 TRIATDRAFT_48067	74	0.62	1.19354838709677	0.503109368822495
01.02.07.01 regulation of nitrogen metabolism	2	0.74	TRIATDRAFT_33283 TRIATDRAFT_48067	42	0.35	2.11428571428571	0.24654811762846
01.03 nucleotide/nucleoside/nucleobase metabolism	10	3.73	TRIATDRAFT_214583 TRIATDRAFT_281288 TRIATDRAFT_142164 TRIATDRAFT_257930 TRIATDRAFT_300618 TRIATDRAFT_300248 TRIATDRAFT_300712 TRIATDRAFT_136954 TRIATDRAFT_136872 TRIATDRAFT_302974	410	3.46	1.07803468208092	0.453043930073375
01.03.01 purin nucleotide/nucleoside/nucleobase metabolism	4	1.49	TRIATDRAFT_281288 TRIATDRAFT_142164 TRIATDRAFT_257930 TRIATDRAFT_136954	154	1.30	1.14615384615385	0.463725748451446
01.03.01.03 purine nucleotide/nucleoside/nucleobase anabolism	2	0.74	TRIATDRAFT_281288 TRIATDRAFT_142164	34	0.28	2.64285714285714	0.179787010078236
01.03.04 pyrimidine nucleotide/nucleoside/nucleobase metabolism	3	1.11	TRIATDRAFT_300248 TRIATDRAFT_136872 TRIATDRAFT_302974	72	0.60	1.85	0.223783401772747
01.03.04.03 pyrimidine nucleotide/nucleoside/nucleobase anabolism	2	0.74	TRIATDRAFT_136872 TRIATDRAFT_302974	22	0.18	4.11111111111111	0.0879727690789912
01.03.16 polynucleotide degradation	2	0.74	TRIATDRAFT_300618 TRIATDRAFT_300712	121	1.02	0.725490196078431	1
01.04 phosphate metabolism	9	3.35	TRIATDRAFT_214583 TRIATDRAFT_53554 TRIATDRAFT_173635 TRIATDRAFT_155005 TRIATDRAFT_93077 TRIATDRAFT_152366 TRIATDRAFT_246378 TRIATDRAFT_29756 TRIATDRAFT_302945	596	5.04	0.66468253968254	1
01.04.04 regulation of phosphate metabolism	2	0.74	TRIATDRAFT_173635 TRIATDRAFT_152366	36	0.30	2.46666666666667	0.196259681444092
01.05 C-compound and carbohydrate metabolism	60	22.3	TRIATDRAFT_261131 TRIATDRAFT_297323 TRIATDRAFT_164996 TRIATDRAFT_82756 TRIATDRAFT_50821 TRIATDRAFT_315240 TRIATDRAFT_146607 TRIATDRAFT_49527 TRIATDRAFT_143748 TRIATDRAFT_255242 TRIATDRAFT_214583 TRIATDRAFT_53554 TRIATDRAFT_305582 TRIATDRAFT_298266 TRIATDRAFT_155005 TRIATDRAFT_52312 TRIATDRAFT_44429 TRIATDRAFT_93077 TRIATDRAFT_90295 TRIATDRAFT_217415 TRIATDRAFT_298907 TRIATDRAFT_218164 TRIATDRAFT_…	1455	12.3	1.8130081300813	2.30189801890262e-06
01.05.02 sugar, glucoside, polyol and carboxylate metabolism	11	4.10	TRIATDRAFT_49527 TRIATDRAFT_298266 TRIATDRAFT_155005 TRIATDRAFT_93077 TRIATDRAFT_218164 TRIATDRAFT_43222 TRIATDRAFT_240908 TRIATDRAFT_241220 TRIATDRAFT_257866 TRIATDRAFT_300815 TRIATDRAFT_136872	272	2.30	1.78260869565217	0.0459919001777018
01.05.02.01 nucleotide-sugar metabolism	1	0.37	TRIATDRAFT_241220	15	0.12	3.08333333333333	0.291312527376529
01.05.02.04 sugar, glucoside, polyol and carboxylate anabolism	3	1.11	TRIATDRAFT_155005 TRIATDRAFT_93077 TRIATDRAFT_257866	81	0.68	1.63235294117647	0.278659127353661
01.05.02.07 sugar, glucoside, polyol and carboxylate catabolism	6	2.23	TRIATDRAFT_49527 TRIATDRAFT_298266 TRIATDRAFT_155005 TRIATDRAFT_93077 TRIATDRAFT_240908 TRIATDRAFT_300815	194	1.64	1.35975609756098	0.27805047408289
01.05.03 polysaccharide metabolism	9	3.35	TRIATDRAFT_44429 TRIATDRAFT_93077 TRIATDRAFT_217415 TRIATDRAFT_218164 TRIATDRAFT_44123 TRIATDRAFT_241220 TRIATDRAFT_16857 TRIATDRAFT_37606 TRIATDRAFT_79473	237	2.00	1.675	0.0908296336789411
01.05.06 C-2 compound and organic acid metabolism	5	1.86	TRIATDRAFT_143748 TRIATDRAFT_240908 TRIATDRAFT_256374 TRIATDRAFT_300064 TRIATDRAFT_147737	39	0.33	5.63636363636364	0.00177143454930135
01.05.06.07 C-2 compound and organic acid catabolism	5	1.86	TRIATDRAFT_143748 TRIATDRAFT_240908 TRIATDRAFT_256374 TRIATDRAFT_300064 TRIATDRAFT_147737	32	0.27	6.88888888888889	0.000704970359164561
01.05.09 aminosaccharide metabolism	4	1.49	TRIATDRAFT_218164 TRIATDRAFT_257866 TRIATDRAFT_79507 TRIATDRAFT_37606	64	0.54	2.75925925925926	0.0570875150848585
01.05.09.07 aminosaccharide catabolism	2	0.74	TRIATDRAFT_257866 TRIATDRAFT_79507	26	0.22	3.36363636363636	0.116796405928171
01.05.10 aliphatic hydrocarbon metabolism	1	0.37	TRIATDRAFT_295408	7	0.05	7.4	0.148399062275893
01.05.10.07 aliphatic hydrocarbon catabolism	1	0.37	TRIATDRAFT_295408	7	0.05	7.4	0.148399062275893
01.05.11 aromate metabolism	3	1.11	TRIATDRAFT_297323 TRIATDRAFT_292305 TRIATDRAFT_143500	91	0.77	1.44155844155844	0.340866154425327
01.05.11.07 aromate catabolism	3	1.11	TRIATDRAFT_297323 TRIATDRAFT_292305 TRIATDRAFT_143500	67	0.56	1.98214285714286	0.194318563785619
01.05.11.07.01 aerobic aromate catabolism	3	1.11	TRIATDRAFT_297323 TRIATDRAFT_292305 TRIATDRAFT_143500	65	0.55	2.01818181818182	0.18282029994882
01.05.11.07.02 anaerobic aromate catabolism	1	0.37	TRIATDRAFT_143500	7	0.05	7.4	0.148399062275893
01.05.13 transfer of activated C-1 groups	4	1.49	TRIATDRAFT_164996 TRIATDRAFT_214583 TRIATDRAFT_148985 TRIATDRAFT_302945	81	0.68	2.19117647058824	0.111870985244811
01.05.13.01 S-adenosyl-methionine - homocysteine cycle	1	0.37	TRIATDRAFT_214583	35	0.29	1.27586206896552	0.552532267241286
01.05.25 regulation of C-compound and carbohydrate metabolism	3	1.11	TRIATDRAFT_305582 TRIATDRAFT_298907 TRIATDRAFT_228302	192	1.62	0.685185185185185	1
01.06 lipid, fatty acid and isoprenoid metabolism	23	8.58	TRIATDRAFT_315240 TRIATDRAFT_255242 TRIATDRAFT_290086 TRIATDRAFT_214583 TRIATDRAFT_290378 TRIATDRAFT_298014 TRIATDRAFT_291159 TRIATDRAFT_46228 TRIATDRAFT_43222 TRIATDRAFT_256374 TRIATDRAFT_152366 TRIATDRAFT_283564 TRIATDRAFT_87687 TRIATDRAFT_300064 TRIATDRAFT_79361 TRIATDRAFT_300252 TRIATDRAFT_37606 TRIATDRAFT_320236 TRIATDRAFT_177132 TRIATDRAFT_285336 TRIATDRAFT_295125 TRIATDRAFT_302658 TRIATDRA…	792	6.70	1.28059701492537	0.13245234115711
01.06.02 membrane lipid metabolism	3	1.11	TRIATDRAFT_214583 TRIATDRAFT_43222 TRIATDRAFT_37606	151	1.27	0.874015748031496	1
01.06.02.01 phospholipid metabolism	1	0.37	TRIATDRAFT_214583	117	0.99	0.373737373737374	1
01.06.02.03 sphingolipid metabolism	2	0.74	TRIATDRAFT_43222 TRIATDRAFT_37606	11	0.09	8.22222222222222	0.024628130951592
01.06.05 fatty acid metabolism	2	0.74	TRIATDRAFT_291159 TRIATDRAFT_155802	138	1.16	0.637931034482759	1
01.06.06 isoprenoid metabolism	6	2.23	TRIATDRAFT_290086 TRIATDRAFT_291159 TRIATDRAFT_46228 TRIATDRAFT_177132 TRIATDRAFT_295125 TRIATDRAFT_302658	158	1.33	1.67669172932331	0.150063971803295
01.06.06.05 sesquiterpenes metabolism	1	0.37	TRIATDRAFT_295125	11	0.09	4.11111111111111	0.223122972174477
01.06.06.11 tetracyclic and pentacyclic triterpenes (cholesterin, steroids and hopanoids) metabolism	4	1.49	TRIATDRAFT_291159 TRIATDRAFT_46228 TRIATDRAFT_177132 TRIATDRAFT_302658	120	1.01	1.47524752475248	0.289639068829963
01.06.10 regulation of lipid, fatty acid and isoprenoid metabolism	1	0.37	TRIATDRAFT_152366	35	0.29	1.27586206896552	0.552532267241286
01.07 metabolism of vitamins, cofactors, and prosthetic groups	15	5.59	TRIATDRAFT_254530 TRIATDRAFT_297210 TRIATDRAFT_82756 TRIATDRAFT_297484 TRIATDRAFT_143748 TRIATDRAFT_255242 TRIATDRAFT_290378 TRIATDRAFT_46228 TRIATDRAFT_299703 TRIATDRAFT_87687 TRIATDRAFT_38111 TRIATDRAFT_300248 TRIATDRAFT_177132 TRIATDRAFT_148120 TRIATDRAFT_146562	330	2.79	2.00358422939068	0.00833766307124647
01.07.01 biosynthesis of vitamins, cofactors, and prosthetic groups	11	4.10	TRIATDRAFT_254530 TRIATDRAFT_297210 TRIATDRAFT_82756 TRIATDRAFT_143748 TRIATDRAFT_255242 TRIATDRAFT_299703 TRIATDRAFT_87687 TRIATDRAFT_38111 TRIATDRAFT_300248 TRIATDRAFT_148120 TRIATDRAFT_146562	188	1.59	2.57861635220126	0.00373644080844741
01.20 secondary metabolism	42	15.6	TRIATDRAFT_210728 TRIATDRAFT_233016 TRIATDRAFT_297323 TRIATDRAFT_212102 TRIATDRAFT_50821 TRIATDRAFT_297484 TRIATDRAFT_262121 TRIATDRAFT_49607 TRIATDRAFT_315645 TRIATDRAFT_290086 TRIATDRAFT_214583 TRIATDRAFT_262365 TRIATDRAFT_214400 TRIATDRAFT_237038 TRIATDRAFT_52312 TRIATDRAFT_44429 TRIATDRAFT_90295 TRIATDRAFT_46228 TRIATDRAFT_292305 TRIATDRAFT_264569 TRIATDRAFT_292317 TRIATDRAFT_87687 TRIATDRAFT…	1321	11.1	1.40540540540541	0.0146926975706062
01.20.01 metabolism of primary metabolic sugar derivatives	2	0.74	TRIATDRAFT_214583 TRIATDRAFT_79361	22	0.18	4.11111111111111	0.0879727690789912
01.20.01.07 metabolism of glycosides	1	0.37	TRIATDRAFT_214583	4	0.03	12.3333333333333	0.0876950050280185
01.20.05 metabolism of acetic acid derivatives	2	0.74	TRIATDRAFT_212102 TRIATDRAFT_90295	55	0.46	1.60869565217391	0.355654509935749
01.20.05.11 metabolism of polyketides	2	0.74	TRIATDRAFT_212102 TRIATDRAFT_90295	32	0.27	2.74074074074074	0.163544295808731
01.20.15 metabolism of derivatives of dehydroquinic acid, shikimic acid and chorismic acid	1	0.37	TRIATDRAFT_148120	32	0.27	1.37037037037037	0.520556395502372
01.20.15.03 metabolism of ubiquinone	1	0.37	TRIATDRAFT_148120	14	0.11	3.36363636363636	0.274845712510647
01.20.17 metabolism of secondary products derived from primary amino acids	3	1.11	TRIATDRAFT_50821 TRIATDRAFT_237038 TRIATDRAFT_302945	66	0.55	2.01818181818182	0.188546549712247
01.20.17.01 metabolism of nonprotein amino acids	2	0.74	TRIATDRAFT_237038 TRIATDRAFT_302945	20	0.16	4.625	0.0745011004737381
01.20.17.03 metabolism of amines	1	0.37	TRIATDRAFT_50821	21	0.17	2.17647058823529	0.382576985093651
01.20.19 metabolism of secondary products derived from glycine, L-serine and L-alanine	1	0.37	TRIATDRAFT_146562	44	0.37	1	0.636262603350279
01.20.19.01 metabolism of porphyrins	1	0.37	TRIATDRAFT_146562	35	0.29	1.27586206896552	0.552532267241286
01.20.31 metabolism of secondary products derived from L-lysine, L-arginine and L-histidine	1	0.37	TRIATDRAFT_148985	14	0.11	3.36363636363636	0.274845712510647
01.20.35 metabolism of secondary products derived from L-phenylalanine and L-tyrosine	1	0.37	TRIATDRAFT_292317	51	0.43	0.86046511627907	1
01.20.35.01 metabolism of phenylpropanoids	1	0.37	TRIATDRAFT_292317	43	0.36	1.02777777777778	0.62778962444527
01.20.36 non-ribosomal peptide synthesis	1	0.37	TRIATDRAFT_212102	37	0.31	1.19354838709677	0.572659983324172
01.20.37 metabolism of peptide derived compounds	1	0.37	TRIATDRAFT_87687	49	0.41	0.902439024390244	1
01.20.37.01 metabolism of thioredoxin, glutaredoxin, glutathion	1	0.37	TRIATDRAFT_87687	24	0.20	1.85	0.423717688657033
01.25 extracellular metabolism	2	0.74	TRIATDRAFT_44123 TRIATDRAFT_285336	60	0.50	1.48	0.396327452596947
01.25.01 extracellular polysaccharide degradation	1	0.37	TRIATDRAFT_44123	26	0.22	1.68181818181818	0.449615758234293
01.25.07 extracellular ester compound degradation	1	0.37	TRIATDRAFT_285336	11	0.09	4.11111111111111	0.223122972174477
02 ENERGY	23	8.58	TRIATDRAFT_210911 TRIATDRAFT_82756 TRIATDRAFT_297484 TRIATDRAFT_143748 TRIATDRAFT_155005 TRIATDRAFT_93077 TRIATDRAFT_90295 TRIATDRAFT_256104 TRIATDRAFT_44123 TRIATDRAFT_240908 TRIATDRAFT_256374 TRIATDRAFT_152366 TRIATDRAFT_292308 TRIATDRAFT_292317 TRIATDRAFT_300064 TRIATDRAFT_257930 TRIATDRAFT_131293 TRIATDRAFT_246793 TRIATDRAFT_148757 TRIATDRAFT_285321 TRIATDRAFT_147737 TRIATDRAFT_130414 TRIATDR…	635	5.37	1.59776536312849	0.0179512176978077
02.01 glycolysis and gluconeogenesis	6	2.23	TRIATDRAFT_82756 TRIATDRAFT_155005 TRIATDRAFT_300064 TRIATDRAFT_257930 TRIATDRAFT_246793 TRIATDRAFT_147737	120	1.01	2.20792079207921	0.0554156260899843
02.01.01 glycolysis methylglyoxal bypass	2	0.74	TRIATDRAFT_82756 TRIATDRAFT_155005	18	0.15	4.93333333333333	0.0617767060952205
02.01.03 regulation of glycolysis and gluconeogenesis	1	0.37	TRIATDRAFT_155005	19	0.16	2.3125	0.353537182917205
02.10 tricarboxylic-acid pathway (citrate cycle, Krebs cycle, TCA cycle)	1	0.37	TRIATDRAFT_143748	54	0.45	0.822222222222222	1
02.11 electron transport and membrane-associated energy conservation	8	2.98	TRIATDRAFT_210911 TRIATDRAFT_297484 TRIATDRAFT_90295 TRIATDRAFT_256374 TRIATDRAFT_292308 TRIATDRAFT_131293 TRIATDRAFT_148757 TRIATDRAFT_155802	157	1.32	2.25757575757576	0.0266545688119459
02.11.05 accessory proteins of electron transport and membrane-associated energy conservation	1	0.37	TRIATDRAFT_148757	54	0.45	0.822222222222222	1
02.11.07 regulation of electron transport and membrane-associated energy conservation	2	0.74	TRIATDRAFT_90295 TRIATDRAFT_292308	11	0.09	8.22222222222222	0.024628130951592
02.13 respiration	4	1.49	TRIATDRAFT_256104 TRIATDRAFT_240908 TRIATDRAFT_256374 TRIATDRAFT_148757	173	1.46	1.02054794520548	0.554959193382961
02.13.01 anaerobic respiration	1	0.37	TRIATDRAFT_256104	10	0.08	4.625	0.20507798660876
02.13.03 aerobic respiration	1	0.37	TRIATDRAFT_148757	103	0.87	0.425287356321839	1
02.16 fermentation	8	2.98	TRIATDRAFT_143748 TRIATDRAFT_256374 TRIATDRAFT_292317 TRIATDRAFT_300064 TRIATDRAFT_246793 TRIATDRAFT_285321 TRIATDRAFT_147737 TRIATDRAFT_130414	106	0.89	3.34831460674157	0.00279956906319656
02.16.01 alcohol fermentation	5	1.86	TRIATDRAFT_256374 TRIATDRAFT_292317 TRIATDRAFT_300064 TRIATDRAFT_246793 TRIATDRAFT_285321	60	0.50	3.72	0.0114422615173211
02.16.11 propionate fermentation	1	0.37	TRIATDRAFT_147737	5	0.04	9.25	0.108394102441876
02.16.13 acetate fermentation	1	0.37	TRIATDRAFT_143748	3	0.02	18.5	0.0665172017666506
02.19 metabolism of energy reserves (e.g. glycogen, trehalose)	2	0.74	TRIATDRAFT_93077 TRIATDRAFT_44123	57	0.48	1.54166666666667	0.37205265243751
02.25 oxidation of fatty acids	2	0.74	TRIATDRAFT_152366 TRIATDRAFT_155802	58	0.49	1.51020408163265	0.380189530867353
02.45 energy conversion and regeneration	4	1.49	TRIATDRAFT_297484 TRIATDRAFT_143748 TRIATDRAFT_240908 TRIATDRAFT_257930	96	0.81	1.83950617283951	0.173681783208748
10 CELL CYCLE AND DNA PROCESSING	10	3.73	TRIATDRAFT_157321 TRIATDRAFT_298169 TRIATDRAFT_298907 TRIATDRAFT_318229 TRIATDRAFT_161811 TRIATDRAFT_299703 TRIATDRAFT_244327 TRIATDRAFT_16905 TRIATDRAFT_185053 TRIATDRAFT_229184	1095	9.26	0.40280777537797	0.999871275716785
10.01 DNA processing	7	2.61	TRIATDRAFT_298169 TRIATDRAFT_318229 TRIATDRAFT_161811 TRIATDRAFT_299703 TRIATDRAFT_16905 TRIATDRAFT_185053 TRIATDRAFT_229184	615	5.20	0.501923076923077	1
10.01.05 DNA recombination and DNA repair	6	2.23	TRIATDRAFT_318229 TRIATDRAFT_161811 TRIATDRAFT_299703 TRIATDRAFT_16905 TRIATDRAFT_185053 TRIATDRAFT_229184	329	2.78	0.802158273381295	1
10.01.05.01 DNA repair	6	2.23	TRIATDRAFT_318229 TRIATDRAFT_161811 TRIATDRAFT_299703 TRIATDRAFT_16905 TRIATDRAFT_185053 TRIATDRAFT_229184	283	2.39	0.933054393305439	1
10.01.05.03 DNA recombination	1	0.37	TRIATDRAFT_161811	117	0.99	0.373737373737374	1
10.01.09 DNA restriction or modification	2	0.74	TRIATDRAFT_298169 TRIATDRAFT_161811	282	2.38	0.310924369747899	1
10.01.09.05 DNA conformation modification (e.g. chromatin)	2	0.74	TRIATDRAFT_298169 TRIATDRAFT_161811	276	2.33	0.317596566523605	1
10.03 cell cycle	4	1.49	TRIATDRAFT_157321 TRIATDRAFT_298169 TRIATDRAFT_298907 TRIATDRAFT_244327	700	5.92	0.251689189189189	1
10.03.01 mitotic cell cycle and cell cycle control	4	1.49	TRIATDRAFT_157321 TRIATDRAFT_298169 TRIATDRAFT_298907 TRIATDRAFT_244327	495	4.18	0.356459330143541	1
10.03.01.01 mitotic cell cycle	1	0.37	TRIATDRAFT_244327	209	1.76	0.210227272727273	1
10.03.01.01.03 G1/S transition of mitotic cell cycle	1	0.37	TRIATDRAFT_244327	48	0.40	0.925	1
10.03.01.02 cell cycle arrest	1	0.37	TRIATDRAFT_298169	27	0.22	1.68181818181818	0.462126612924132
11 TRANSCRIPTION	16	5.97	TRIATDRAFT_298169 TRIATDRAFT_173635 TRIATDRAFT_46228 TRIATDRAFT_152366 TRIATDRAFT_131981 TRIATDRAFT_318229 TRIATDRAFT_41041 TRIATDRAFT_161811 TRIATDRAFT_300154 TRIATDRAFT_244327 TRIATDRAFT_131396 TRIATDRAFT_300712 TRIATDRAFT_33283 TRIATDRAFT_136954 TRIATDRAFT_48067 TRIATDRAFT_302987	1212	10.2	0.585294117647059	0.995410232681341
11.02 RNA synthesis	13	4.85	TRIATDRAFT_298169 TRIATDRAFT_173635 TRIATDRAFT_152366 TRIATDRAFT_131981 TRIATDRAFT_318229 TRIATDRAFT_41041 TRIATDRAFT_161811 TRIATDRAFT_300154 TRIATDRAFT_244327 TRIATDRAFT_131396 TRIATDRAFT_33283 TRIATDRAFT_136954 TRIATDRAFT_48067	938	7.93	0.611601513240857	0.983131302329378
11.02.02 tRNA synthesis	1	0.37	TRIATDRAFT_136954	54	0.45	0.822222222222222	1
11.02.03 mRNA synthesis	11	4.10	TRIATDRAFT_298169 TRIATDRAFT_173635 TRIATDRAFT_152366 TRIATDRAFT_131981 TRIATDRAFT_318229 TRIATDRAFT_41041 TRIATDRAFT_161811 TRIATDRAFT_244327 TRIATDRAFT_131396 TRIATDRAFT_33283 TRIATDRAFT_48067	858	7.26	0.564738292011019	1
11.02.03.01 general transcription activities	2	0.74	TRIATDRAFT_244327 TRIATDRAFT_131396	187	1.58	0.468354430379747	1
11.02.03.01.01 transcription initiation	1	0.37	TRIATDRAFT_131396	43	0.36	1.02777777777778	0.62778962444527
11.02.03.04 transcriptional control	11	4.10	TRIATDRAFT_298169 TRIATDRAFT_173635 TRIATDRAFT_152366 TRIATDRAFT_131981 TRIATDRAFT_318229 TRIATDRAFT_41041 TRIATDRAFT_161811 TRIATDRAFT_244327 TRIATDRAFT_131396 TRIATDRAFT_33283 TRIATDRAFT_48067	743	6.28	0.652866242038217	1
11.02.03.04.01 transcription activation	2	0.74	TRIATDRAFT_152366 TRIATDRAFT_131981	186	1.57	0.471337579617834	1
11.02.03.04.03 transcription repression	4	1.49	TRIATDRAFT_298169 TRIATDRAFT_173635 TRIATDRAFT_33283 TRIATDRAFT_48067	111	0.93	1.60215053763441	0.244470050427592
11.04 RNA processing	6	2.23	TRIATDRAFT_298169 TRIATDRAFT_46228 TRIATDRAFT_300154 TRIATDRAFT_300712 TRIATDRAFT_136954 TRIATDRAFT_302987	447	3.78	0.58994708994709	1
11.04.01 rRNA processing	2	0.74	TRIATDRAFT_298169 TRIATDRAFT_302987	188	1.59	0.465408805031447	1
11.04.03 mRNA processing (splicing, 5^-, 3^-end processing)	5	1.86	TRIATDRAFT_46228 TRIATDRAFT_300154 TRIATDRAFT_300712 TRIATDRAFT_136954 TRIATDRAFT_302987	275	2.32	0.801724137931034	1
11.04.03.01 splicing	3	1.11	TRIATDRAFT_46228 TRIATDRAFT_300154 TRIATDRAFT_302987	216	1.82	0.60989010989011	1
11.04.03.01.10 regulation of splicing	2	0.74	TRIATDRAFT_300154 TRIATDRAFT_302987	10	0.08	9.25	0.0204527161443761
11.06 RNA modification	1	0.37	TRIATDRAFT_136954	70	0.59	0.627118644067797	1
11.06.02 tRNA modification	1	0.37	TRIATDRAFT_136954	47	0.39	0.948717948717949	1
11.06.03 mRNA modification	1	0.37	TRIATDRAFT_136954	5	0.04	9.25	0.108394102441876
11.06.03.01 mRNA editing	1	0.37	TRIATDRAFT_136954	4	0.03	12.3333333333333	0.0876950050280185
12 PROTEIN SYNTHESIS	11	4.10	TRIATDRAFT_289435 TRIATDRAFT_297358 TRIATDRAFT_298169 TRIATDRAFT_298369 TRIATDRAFT_139837 TRIATDRAFT_258286 TRIATDRAFT_34076 TRIATDRAFT_301694 TRIATDRAFT_259826 TRIATDRAFT_296491 TRIATDRAFT_302987	433	3.66	1.12021857923497	0.393809608751544
12.01 ribosome biogenesis	7	2.61	TRIATDRAFT_297358 TRIATDRAFT_298369 TRIATDRAFT_139837 TRIATDRAFT_258286 TRIATDRAFT_301694 TRIATDRAFT_259826 TRIATDRAFT_302987	262	2.21	1.18099547511312	0.384187159646426
12.01.01 ribosomal proteins	7	2.61	TRIATDRAFT_297358 TRIATDRAFT_298369 TRIATDRAFT_139837 TRIATDRAFT_258286 TRIATDRAFT_301694 TRIATDRAFT_259826 TRIATDRAFT_302987	165	1.39	1.87769784172662	0.0818125442113573
12.04 translation	9	3.35	TRIATDRAFT_297358 TRIATDRAFT_298369 TRIATDRAFT_139837 TRIATDRAFT_258286 TRIATDRAFT_34076 TRIATDRAFT_301694 TRIATDRAFT_259826 TRIATDRAFT_296491 TRIATDRAFT_302987	215	1.81	1.85082872928177	0.0564563132719334
12.04.01 translation initiation	2	0.74	TRIATDRAFT_298369 TRIATDRAFT_34076	59	0.49	1.51020408163265	0.388281852334356
12.04.03 translation termination	1	0.37	TRIATDRAFT_296491	7	0.05	7.4	0.148399062275893
12.07 translational control	5	1.86	TRIATDRAFT_298169 TRIATDRAFT_298369 TRIATDRAFT_258286 TRIATDRAFT_259826 TRIATDRAFT_302987	83	0.70	2.65714285714286	0.040163089247959
12.10 aminoacyl-tRNA-synthetases	1	0.37	TRIATDRAFT_289435	43	0.36	1.02777777777778	0.62778962444527
14 PROTEIN FATE (folding, modification, destination)	20	7.46	TRIATDRAFT_296922 TRIATDRAFT_297073 TRIATDRAFT_164996 TRIATDRAFT_171619 TRIATDRAFT_315240 TRIATDRAFT_214583 TRIATDRAFT_53554 TRIATDRAFT_298014 TRIATDRAFT_298272 TRIATDRAFT_298169 TRIATDRAFT_81754 TRIATDRAFT_291037 TRIATDRAFT_46228 TRIATDRAFT_40943 TRIATDRAFT_300063 TRIATDRAFT_33651 TRIATDRAFT_148985 TRIATDRAFT_130160 TRIATDRAFT_140571 TRIATDRAFT_133312	1451	12.2	0.611475409836066	0.996288317747673
14.01 protein folding and stabilization	2	0.74	TRIATDRAFT_300063 TRIATDRAFT_133312	130	1.10	0.672727272727273	1
14.04 protein targeting, sorting and translocation	3	1.11	TRIATDRAFT_171619 TRIATDRAFT_140571 TRIATDRAFT_133312	315	2.66	0.417293233082707	1
14.07 protein modification	14	5.22	TRIATDRAFT_296922 TRIATDRAFT_297073 TRIATDRAFT_164996 TRIATDRAFT_315240 TRIATDRAFT_214583 TRIATDRAFT_53554 TRIATDRAFT_298014 TRIATDRAFT_298272 TRIATDRAFT_291037 TRIATDRAFT_40943 TRIATDRAFT_33651 TRIATDRAFT_148985 TRIATDRAFT_130160 TRIATDRAFT_133312	846	7.15	0.73006993006993	1
14.07.01 modification with fatty acids (e.g. myristylation, palmitylation, farnesylation)	2	0.74	TRIATDRAFT_214583 TRIATDRAFT_133312	46	0.38	1.94736842105263	0.280359692102165
14.07.02 modification with sugar residues (e.g. glycosylation, deglycosylation)	2	0.74	TRIATDRAFT_298272 TRIATDRAFT_133312	78	0.66	1.12121212121212	0.531330771264261
14.07.02.02 N-directed glycosylation, deglycosylation	2	0.74	TRIATDRAFT_298272 TRIATDRAFT_133312	43	0.36	2.05555555555556	0.254996962539073
14.07.03 modification by phosphorylation, dephosphorylation, autophosphorylation	1	0.37	TRIATDRAFT_53554	263	2.22	0.166666666666667	1
14.07.04 modification by acetylation, deacetylation	1	0.37	TRIATDRAFT_315240	72	0.60	0.616666666666667	1
14.07.05 modification by ubiquitination, deubiquitination	1	0.37	TRIATDRAFT_40943	142	1.20	0.308333333333333	1
14.07.09 posttranslational modification of amino acids (e.g. hydroxylation, methylation)	2	0.74	TRIATDRAFT_164996 TRIATDRAFT_148985	52	0.44	1.68181818181818	0.330784646821169
14.07.11 protein processing (proteolytic)	3	1.11	TRIATDRAFT_296922 TRIATDRAFT_298014 TRIATDRAFT_33651	166	1.40	0.792857142857143	1
14.07.11.01 autoproteolytic processing	1	0.37	TRIATDRAFT_298014	21	0.17	2.17647058823529	0.382576985093651
14.13 protein/peptide degradation	8	2.98	TRIATDRAFT_296922 TRIATDRAFT_297073 TRIATDRAFT_298169 TRIATDRAFT_81754 TRIATDRAFT_291037 TRIATDRAFT_46228 TRIATDRAFT_40943 TRIATDRAFT_33651	456	3.85	0.774025974025974	1
14.13.01 cytoplasmic and nuclear protein degradation	4	1.49	TRIATDRAFT_291037 TRIATDRAFT_46228 TRIATDRAFT_40943 TRIATDRAFT_33651	285	2.41	0.618257261410788	1
14.13.01.01 proteasomal degradation (ubiquitin/proteasomal pathway)	1	0.37	TRIATDRAFT_40943	170	1.43	0.258741258741259	1
14.13.04 lysosomal and vacuolar protein degradation	2	0.74	TRIATDRAFT_291037 TRIATDRAFT_33651	47	0.39	1.8974358974359	0.288804711243462
14.13.04.01 lysosomal protein degradation	1	0.37	TRIATDRAFT_33651	3	0.02	18.5	0.0665172017666506
14.13.04.02 vacuolar protein degradation	2	0.74	TRIATDRAFT_291037 TRIATDRAFT_33651	21	0.17	4.35294117647059	0.0811494410363197
16 PROTEIN WITH BINDING FUNCTION OR COFACTOR REQUIREMENT (structural or catalytic)	70	26.1	TRIATDRAFT_297073 TRIATDRAFT_297210 TRIATDRAFT_289435 TRIATDRAFT_164996 TRIATDRAFT_297358 TRIATDRAFT_157321 TRIATDRAFT_50358 TRIATDRAFT_171619 TRIATDRAFT_50821 TRIATDRAFT_315240 TRIATDRAFT_146607 TRIATDRAFT_49527 TRIATDRAFT_214583 TRIATDRAFT_53554 TRIATDRAFT_281288 TRIATDRAFT_298266 TRIATDRAFT_298272 TRIATDRAFT_298169 TRIATDRAFT_81754 TRIATDRAFT_173635 TRIATDRAFT_298369 TRIATDRAFT_52312 TRIATDRAF…	2998	25.3	1.03162055335968	0.411437961750538
16.01 protein binding	28	10.4	TRIATDRAFT_297073 TRIATDRAFT_297210 TRIATDRAFT_164996 TRIATDRAFT_297358 TRIATDRAFT_171619 TRIATDRAFT_315240 TRIATDRAFT_214583 TRIATDRAFT_298272 TRIATDRAFT_298169 TRIATDRAFT_298369 TRIATDRAFT_46228 TRIATDRAFT_298907 TRIATDRAFT_152366 TRIATDRAFT_139837 TRIATDRAFT_40943 TRIATDRAFT_299703 TRIATDRAFT_300154 TRIATDRAFT_300248 TRIATDRAFT_131293 TRIATDRAFT_33651 TRIATDRAFT_258286 TRIATDRAFT_185053 TRIATD…	1598	13.5	0.77037037037037	0.946995064502305
16.01.01 receptor binding	1	0.37	TRIATDRAFT_42719	14	0.11	3.36363636363636	0.274845712510647
16.03 nucleic acid binding	16	5.97	TRIATDRAFT_164996 TRIATDRAFT_298272 TRIATDRAFT_298169 TRIATDRAFT_173635 TRIATDRAFT_298369 TRIATDRAFT_46228 TRIATDRAFT_318229 TRIATDRAFT_318579 TRIATDRAFT_300154 TRIATDRAFT_131396 TRIATDRAFT_258286 TRIATDRAFT_136954 TRIATDRAFT_34076 TRIATDRAFT_185053 TRIATDRAFT_301694 TRIATDRAFT_229184	805	6.81	0.876651982378855	1
16.03.01 DNA binding	7	2.61	TRIATDRAFT_298169 TRIATDRAFT_173635 TRIATDRAFT_318229 TRIATDRAFT_300154 TRIATDRAFT_131396 TRIATDRAFT_185053 TRIATDRAFT_229184	469	3.96	0.659090909090909	1
16.03.03 RNA binding	10	3.73	TRIATDRAFT_298272 TRIATDRAFT_298169 TRIATDRAFT_298369 TRIATDRAFT_46228 TRIATDRAFT_318579 TRIATDRAFT_300154 TRIATDRAFT_258286 TRIATDRAFT_136954 TRIATDRAFT_34076 TRIATDRAFT_301694	327	2.76	1.35144927536232	0.209516216232092
16.05 polysaccharide binding	1	0.37	TRIATDRAFT_44123	28	0.23	1.60869565217391	0.474354118881918
16.07 structural protein binding	1	0.37	TRIATDRAFT_147940	56	0.47	0.787234042553192	1
16.09 lipid binding	2	0.74	TRIATDRAFT_171619 TRIATDRAFT_131981	67	0.56	1.32142857142857	0.451180868264862
16.13 C-compound binding	1	0.37	TRIATDRAFT_315240	41	0.34	1.08823529411765	0.610249267894175
16.13.01 sugar binding	1	0.37	TRIATDRAFT_315240	25	0.21	1.76190476190476	0.436815013914827
16.17 metal binding	22	8.20	TRIATDRAFT_164996 TRIATDRAFT_53554 TRIATDRAFT_281288 TRIATDRAFT_298266 TRIATDRAFT_298169 TRIATDRAFT_81754 TRIATDRAFT_90295 TRIATDRAFT_52401 TRIATDRAFT_256104 TRIATDRAFT_152366 TRIATDRAFT_318229 TRIATDRAFT_292308 TRIATDRAFT_292317 TRIATDRAFT_38111 TRIATDRAFT_300064 TRIATDRAFT_131293 TRIATDRAFT_246793 TRIATDRAFT_136954 TRIATDRAFT_285321 TRIATDRAFT_147940 TRIATDRAFT_29516 TRIATDRAFT_133312	697	5.89	1.39219015280136	0.0727162564477891
16.17.01 calcium binding	1	0.37	TRIATDRAFT_147940	77	0.65	0.569230769230769	1
16.17.03 potassium binding	2	0.74	TRIATDRAFT_131293 TRIATDRAFT_29516	5	0.04	18.5	0.00489861537258636
16.17.05 sodium binding	2	0.74	TRIATDRAFT_131293 TRIATDRAFT_29516	12	0.10	7.4	0.0291175949589203
16.17.07 magnesium binding	3	1.11	TRIATDRAFT_53554 TRIATDRAFT_281288 TRIATDRAFT_131293	118	0.99	1.12121212121212	0.503300505694784
16.17.09 heavy metal binding (Cu, Fe, Zn)	17	6.34	TRIATDRAFT_164996 TRIATDRAFT_53554 TRIATDRAFT_298266 TRIATDRAFT_298169 TRIATDRAFT_81754 TRIATDRAFT_90295 TRIATDRAFT_52401 TRIATDRAFT_256104 TRIATDRAFT_318229 TRIATDRAFT_292308 TRIATDRAFT_292317 TRIATDRAFT_38111 TRIATDRAFT_300064 TRIATDRAFT_246793 TRIATDRAFT_136954 TRIATDRAFT_285321 TRIATDRAFT_133312	450	3.80	1.66842105263158	0.02757830465249
16.19 nucleotide/nucleoside/nucleobase binding	10	3.73	TRIATDRAFT_289435 TRIATDRAFT_50358 TRIATDRAFT_171619 TRIATDRAFT_281288 TRIATDRAFT_298907 TRIATDRAFT_300154 TRIATDRAFT_131293 TRIATDRAFT_246378 TRIATDRAFT_185053 TRIATDRAFT_29756	851	7.20	0.518055555555555	1
16.19.03 ATP binding	5	1.86	TRIATDRAFT_289435 TRIATDRAFT_131293 TRIATDRAFT_246378 TRIATDRAFT_185053 TRIATDRAFT_29756	646	5.46	0.340659340659341	1
16.19.05 GTP binding	3	1.11	TRIATDRAFT_50358 TRIATDRAFT_281288 TRIATDRAFT_298907	128	1.08	1.02777777777778	0.558290855642885
16.21 complex cofactor/cosubstrate/vitamine binding	19	7.08	TRIATDRAFT_157321 TRIATDRAFT_50821 TRIATDRAFT_146607 TRIATDRAFT_49527 TRIATDRAFT_52312 TRIATDRAFT_90295 TRIATDRAFT_256104 TRIATDRAFT_291159 TRIATDRAFT_256374 TRIATDRAFT_241220 TRIATDRAFT_292308 TRIATDRAFT_38111 TRIATDRAFT_79360 TRIATDRAFT_300815 TRIATDRAFT_148757 TRIATDRAFT_295408 TRIATDRAFT_148120 TRIATDRAFT_302658 TRIATDRAFT_155802	436	3.68	1.92391304347826	0.0049761647850353
16.21.01 heme binding	3	1.11	TRIATDRAFT_291159 TRIATDRAFT_38111 TRIATDRAFT_79360	57	0.48	2.3125	0.138946979699079
16.21.05 FAD/FMN binding	8	2.98	TRIATDRAFT_50821 TRIATDRAFT_52312 TRIATDRAFT_256104 TRIATDRAFT_291159 TRIATDRAFT_148757 TRIATDRAFT_295408 TRIATDRAFT_148120 TRIATDRAFT_155802	122	1.03	2.89320388349515	0.0065648980564907
16.21.07 NAD/NADP binding	10	3.73	TRIATDRAFT_50821 TRIATDRAFT_49527 TRIATDRAFT_90295 TRIATDRAFT_291159 TRIATDRAFT_256374 TRIATDRAFT_241220 TRIATDRAFT_292308 TRIATDRAFT_300815 TRIATDRAFT_148757 TRIATDRAFT_302658	210	1.77	2.10734463276836	0.02152574961417
16.21.08 Fe/S binding	1	0.37	TRIATDRAFT_148757	38	0.32	1.15625	0.582382975468592
16.21.11 thiamine pyrophosphate binding	1	0.37	TRIATDRAFT_146607	8	0.06	6.16666666666667	0.167725766595485
16.21.17 pyridoxal phosphate binding	1	0.37	TRIATDRAFT_157321	53	0.44	0.840909090909091	1
18 REGULATION OF METABOLISM AND PROTEIN FUNCTION	5	1.86	TRIATDRAFT_171619 TRIATDRAFT_146607 TRIATDRAFT_298369 TRIATDRAFT_93077 TRIATDRAFT_301030	523	4.42	0.420814479638009	1
18.01 regulation by	1	0.37	TRIATDRAFT_301030	255	2.15	0.172093023255814	1
18.01.07 regulation by binding / dissociation	1	0.37	TRIATDRAFT_301030	109	0.92	0.402173913043478	1
18.02 regulation of protein activity	5	1.86	TRIATDRAFT_171619 TRIATDRAFT_146607 TRIATDRAFT_298369 TRIATDRAFT_93077 TRIATDRAFT_301030	512	4.33	0.429561200923787	1
18.02.01 enzymatic activity regulation / enzyme regulator	3	1.11	TRIATDRAFT_146607 TRIATDRAFT_93077 TRIATDRAFT_301030	315	2.66	0.417293233082707	1
18.02.01.01 enzyme activator	1	0.37	TRIATDRAFT_301030	139	1.17	0.316239316239316	1
18.02.01.01.01 GTPase activator (GAP)	1	0.37	TRIATDRAFT_301030	48	0.40	0.925	1
18.02.01.02 enzyme inhibitor	1	0.37	TRIATDRAFT_301030	57	0.48	0.770833333333333	1
18.02.01.02.01 GTPase inhibitor (GIP)	1	0.37	TRIATDRAFT_301030	12	0.10	3.7	0.240759824648618
18.02.03 guanyl-nucleotide exchange factor (GEF)	2	0.74	TRIATDRAFT_171619 TRIATDRAFT_298369	26	0.22	3.36363636363636	0.116796405928171
18.02.05 regulator of G-protein signalling	1	0.37	TRIATDRAFT_301030	22	0.18	2.05555555555556	0.396605757284827
20 CELLULAR TRANSPORT, TRANSPORT FACILITIES AND TRANSPORT ROUTES	58	21.6	TRIATDRAFT_134257 TRIATDRAFT_233016 TRIATDRAFT_164996 TRIATDRAFT_212010 TRIATDRAFT_171619 TRIATDRAFT_50821 TRIATDRAFT_297484 TRIATDRAFT_262121 TRIATDRAFT_49607 TRIATDRAFT_315645 TRIATDRAFT_173325 TRIATDRAFT_262365 TRIATDRAFT_305582 TRIATDRAFT_214400 TRIATDRAFT_298272 TRIATDRAFT_44378 TRIATDRAFT_90295 TRIATDRAFT_52401 TRIATDRAFT_46092 TRIATDRAFT_291159 TRIATDRAFT_256374 TRIATDRAFT_182617 TRIATDRAF…	1732	14.6	1.47945205479452	0.00120453996320715
20.01 transported compounds (substrates)	51	19.0	TRIATDRAFT_134257 TRIATDRAFT_233016 TRIATDRAFT_164996 TRIATDRAFT_212010 TRIATDRAFT_50821 TRIATDRAFT_297484 TRIATDRAFT_262121 TRIATDRAFT_49607 TRIATDRAFT_315645 TRIATDRAFT_173325 TRIATDRAFT_262365 TRIATDRAFT_305582 TRIATDRAFT_214400 TRIATDRAFT_44378 TRIATDRAFT_90295 TRIATDRAFT_52401 TRIATDRAFT_46092 TRIATDRAFT_291159 TRIATDRAFT_256374 TRIATDRAFT_182617 TRIATDRAFT_131981 TRIATDRAFT_283564 TRIATDRAF…	1311	11.0	1.72727272727273	7.50361275938622e-05
20.01.01 ion transport	15	5.59	TRIATDRAFT_305582 TRIATDRAFT_52401 TRIATDRAFT_40134 TRIATDRAFT_219964 TRIATDRAFT_300063 TRIATDRAFT_131293 TRIATDRAFT_246378 TRIATDRAFT_185053 TRIATDRAFT_32035 TRIATDRAFT_29516 TRIATDRAFT_130160 TRIATDRAFT_228302 TRIATDRAFT_140571 TRIATDRAFT_41966 TRIATDRAFT_259826_b	265	2.24	2.49553571428571	0.00105613397939925
20.01.01.01 cation transport (H+, Na+, K+, Ca2+ , NH4+, etc.)	11	4.10	TRIATDRAFT_305582 TRIATDRAFT_52401 TRIATDRAFT_219964 TRIATDRAFT_300063 TRIATDRAFT_131293 TRIATDRAFT_246378 TRIATDRAFT_185053 TRIATDRAFT_32035 TRIATDRAFT_29516 TRIATDRAFT_130160 TRIATDRAFT_140571	218	1.84	2.22826086956522	0.0109932130602475
20.01.01.01.01 heavy metal ion transport (Cu+, Fe3+, etc.)	3	1.11	TRIATDRAFT_52401 TRIATDRAFT_300063 TRIATDRAFT_32035	79	0.66	1.68181818181818	0.266319744068193
20.01.01.01.01.01 siderophore-iron transport	2	0.74	TRIATDRAFT_300063 TRIATDRAFT_32035	35	0.29	2.55172413793103	0.187998019084543
20.01.01.07 anion transport	5	1.86	TRIATDRAFT_40134 TRIATDRAFT_29516 TRIATDRAFT_228302 TRIATDRAFT_41966 TRIATDRAFT_259826_b	53	0.44	4.22727272727273	0.00683016079561058
20.01.01.07.05 sulfate/sulfite transport	2	0.74	TRIATDRAFT_41966 TRIATDRAFT_259826_b	6	0.05	14.8	0.00723823903252206
20.01.01.07.09 chloride transport	1	0.37	TRIATDRAFT_29516	5	0.04	9.25	0.108394102441876
20.01.03 C-compound and carbohydrate transport	9	3.35	TRIATDRAFT_134257 TRIATDRAFT_233016 TRIATDRAFT_46092 TRIATDRAFT_283564 TRIATDRAFT_40134 TRIATDRAFT_300428 TRIATDRAFT_29756 TRIATDRAFT_228302 TRIATDRAFT_91854	229	1.93	1.73575129533679	0.0771558832452971
20.01.03.01 sugar transport	1	0.37	TRIATDRAFT_134257	42	0.35	1.05714285714286	0.619120027656754
20.01.03.03 C4-dicarboxylate transport (e.g. malate, succinate, fumarate)	3	1.11	TRIATDRAFT_40134 TRIATDRAFT_300428 TRIATDRAFT_228302	12	0.10	11.1	0.00218081091495067
20.01.07 amino acid/amino acid derivatives transport	5	1.86	TRIATDRAFT_173325 TRIATDRAFT_262365 TRIATDRAFT_300428 TRIATDRAFT_29516 TRIATDRAFT_130160	72	0.60	3.1	0.0235864047789087
20.01.09 peptide transport	1	0.37	TRIATDRAFT_299725	24	0.20	1.85	0.423717688657033
20.01.11 amine / polyamine transport	4	1.49	TRIATDRAFT_182617 TRIATDRAFT_283564 TRIATDRAFT_264569 TRIATDRAFT_29516	41	0.34	4.38235294117647	0.013567657072058
20.01.13 lipid/fatty acid transport	3	1.11	TRIATDRAFT_131981 TRIATDRAFT_283564 TRIATDRAFT_246378	114	0.96	1.15625	0.480348253541719
20.01.15 electron transport	14	5.22	TRIATDRAFT_50821 TRIATDRAFT_297484 TRIATDRAFT_49607 TRIATDRAFT_214400 TRIATDRAFT_90295 TRIATDRAFT_291159 TRIATDRAFT_256374 TRIATDRAFT_292308 TRIATDRAFT_38111 TRIATDRAFT_131293 TRIATDRAFT_148757 TRIATDRAFT_148120 TRIATDRAFT_130160 TRIATDRAFT_155802	310	2.62	1.99236641221374	0.0112140625169274
20.01.21 RNA transport	2	0.74	TRIATDRAFT_164996 TRIATDRAFT_300154	66	0.55	1.34545454545455	0.443513336787869
20.01.23 allantoin and allantoate transport	2	0.74	TRIATDRAFT_257840 TRIATDRAFT_91854	51	0.43	1.72093023255814	0.322433190156308
20.01.25 vitamine/cofactor transport	2	0.74	TRIATDRAFT_257840 TRIATDRAFT_91854	56	0.47	1.57446808510638	0.363873506025635
20.01.26 neurotransmitter transport	1	0.37	TRIATDRAFT_131293	29	0.24	1.54166666666667	0.486304669962648
20.01.27 drug/toxin transport	11	4.10	TRIATDRAFT_212010 TRIATDRAFT_262121 TRIATDRAFT_315645 TRIATDRAFT_44378 TRIATDRAFT_182617 TRIATDRAFT_264569 TRIATDRAFT_164074 TRIATDRAFT_246378 TRIATDRAFT_247137 TRIATDRAFT_30874 TRIATDRAFT_321773	171	1.44	2.84722222222222	0.00178905172790953
20.03 transport facilities	31	11.5	TRIATDRAFT_134257 TRIATDRAFT_233016 TRIATDRAFT_212010 TRIATDRAFT_262121 TRIATDRAFT_315645 TRIATDRAFT_173325 TRIATDRAFT_305582 TRIATDRAFT_44378 TRIATDRAFT_52401 TRIATDRAFT_46092 TRIATDRAFT_182617 TRIATDRAFT_283564 TRIATDRAFT_219964 TRIATDRAFT_264569 TRIATDRAFT_299551 TRIATDRAFT_164074 TRIATDRAFT_300063 TRIATDRAFT_299725 TRIATDRAFT_257840 TRIATDRAFT_131293 TRIATDRAFT_246378 TRIATDRAFT_247137 TRIATD…	648	5.48	2.0985401459854	6.62563231286091e-05
20.03.01 channel / pore class transport	1	0.37	TRIATDRAFT_283564	47	0.39	0.948717948717949	1
20.03.02 carrier (electrochemical potential-driven transport)	7	2.61	TRIATDRAFT_315645 TRIATDRAFT_305582 TRIATDRAFT_182617 TRIATDRAFT_29516 TRIATDRAFT_321773 TRIATDRAFT_130160 TRIATDRAFT_228302	119	1.00	2.61	0.0186105273513606
20.03.02.02 symporter	2	0.74	TRIATDRAFT_29516 TRIATDRAFT_130160	50	0.42	1.76190476190476	0.314056085952696
20.03.02.02.01 proton driven symporter	1	0.37	TRIATDRAFT_130160	37	0.31	1.19354838709677	0.572659983324172
20.03.02.02.02 sodium driven symporter	1	0.37	TRIATDRAFT_29516	7	0.05	7.4	0.148399062275893
20.03.02.03 antiporter	5	1.86	TRIATDRAFT_315645 TRIATDRAFT_305582 TRIATDRAFT_182617 TRIATDRAFT_321773 TRIATDRAFT_228302	71	0.60	3.1	0.0223482233119427
20.03.02.03.01 proton driven antiporter	4	1.49	TRIATDRAFT_315645 TRIATDRAFT_305582 TRIATDRAFT_182617 TRIATDRAFT_321773	51	0.43	3.46511627906977	0.0281134679542924
20.03.09 phosphotransferase system	1	0.37	TRIATDRAFT_299551	3	0.02	18.5	0.0665172017666506
20.03.22 transport ATPases	3	1.11	TRIATDRAFT_219964 TRIATDRAFT_131293 TRIATDRAFT_246378	100	0.84	1.32142857142857	0.396580912112223
20.03.25 ABC transporters	5	1.86	TRIATDRAFT_212010 TRIATDRAFT_262121 TRIATDRAFT_44378 TRIATDRAFT_164074 TRIATDRAFT_246378	93	0.78	2.38461538461538	0.0601412073351891
20.09 transport routes	32	11.9	TRIATDRAFT_233016 TRIATDRAFT_212010 TRIATDRAFT_171619 TRIATDRAFT_262121 TRIATDRAFT_315645 TRIATDRAFT_173325 TRIATDRAFT_298272 TRIATDRAFT_44378 TRIATDRAFT_52401 TRIATDRAFT_182617 TRIATDRAFT_131981 TRIATDRAFT_283564 TRIATDRAFT_40134 TRIATDRAFT_219964 TRIATDRAFT_264569 TRIATDRAFT_40943 TRIATDRAFT_164074 TRIATDRAFT_299725 TRIATDRAFT_257840 TRIATDRAFT_300428 TRIATDRAFT_301030 TRIATDRAFT_247137 TRIATDR…	1125	9.52	1.25	0.106283736458486
20.09.04 mitochondrial transport	3	1.11	TRIATDRAFT_300428 TRIATDRAFT_228302 TRIATDRAFT_133312	114	0.96	1.15625	0.480348253541719
20.09.07 vesicular transport (Golgi network, etc.)	3	1.11	TRIATDRAFT_171619 TRIATDRAFT_131981 TRIATDRAFT_42719	270	2.28	0.486842105263158	1
20.09.07.03 ER to Golgi transport	1	0.37	TRIATDRAFT_171619	76	0.64	0.578125	1
20.09.07.05 intra Golgi transport	1	0.37	TRIATDRAFT_171619	30	0.25	1.48	0.497984516272143
20.09.07.06 post Golgi transport	1	0.37	TRIATDRAFT_42719	19	0.16	2.3125	0.353537182917205
20.09.13 vacuolar/lysosomal transport	4	1.49	TRIATDRAFT_173325 TRIATDRAFT_301030 TRIATDRAFT_130160 TRIATDRAFT_140571	160	1.35	1.1037037037037	0.493335261203091
20.09.14 cytoskeleton-dependent transport	1	0.37	TRIATDRAFT_40943	71	0.60	0.616666666666667	1
20.09.16 cellular export and secretion	14	5.22	TRIATDRAFT_212010 TRIATDRAFT_171619 TRIATDRAFT_262121 TRIATDRAFT_315645 TRIATDRAFT_298272 TRIATDRAFT_44378 TRIATDRAFT_182617 TRIATDRAFT_283564 TRIATDRAFT_264569 TRIATDRAFT_164074 TRIATDRAFT_301030 TRIATDRAFT_247137 TRIATDRAFT_30874 TRIATDRAFT_321773	259	2.19	2.38356164383562	0.00236348283618413
20.09.16.01 Type I protein secretion system (ABC-type transport systems)	1	0.37	TRIATDRAFT_262121	30	0.25	1.48	0.497984516272143
20.09.16.07 non-vesicular cellular export	2	0.74	TRIATDRAFT_164074 TRIATDRAFT_30874	7	0.05	14.8	0.00998255221087575
20.09.18 cellular import	10	3.73	TRIATDRAFT_233016 TRIATDRAFT_173325 TRIATDRAFT_52401 TRIATDRAFT_283564 TRIATDRAFT_40134 TRIATDRAFT_299725 TRIATDRAFT_257840 TRIATDRAFT_32035 TRIATDRAFT_41966 TRIATDRAFT_91854	412	3.48	1.07183908045977	0.459164641616305
20.09.18.07 non-vesicular cellular import	7	2.61	TRIATDRAFT_233016 TRIATDRAFT_52401 TRIATDRAFT_40134 TRIATDRAFT_299725 TRIATDRAFT_257840 TRIATDRAFT_41966 TRIATDRAFT_91854	193	1.63	1.60122699386503	0.149608895437992
30 CELLULAR COMMUNICATION/SIGNAL TRANSDUCTION MECHANISM	7	2.61	TRIATDRAFT_171619 TRIATDRAFT_49527 TRIATDRAFT_156579 TRIATDRAFT_46092 TRIATDRAFT_298907 TRIATDRAFT_300154 TRIATDRAFT_301030	603	5.10	0.511764705882353	1
30.01 cellular signalling	6	2.23	TRIATDRAFT_171619 TRIATDRAFT_49527 TRIATDRAFT_156579 TRIATDRAFT_46092 TRIATDRAFT_298907 TRIATDRAFT_301030	522	4.41	0.505668934240363	1
30.01.05 enzyme mediated signal transduction	1	0.37	TRIATDRAFT_298907	304	2.57	0.143968871595331	1
30.01.05.05 G-protein mediated signal transduction	1	0.37	TRIATDRAFT_298907	137	1.15	0.321739130434783	1
30.01.05.05.01 small GTPase mediated signal transduction	1	0.37	TRIATDRAFT_298907	95	0.80	0.4625	1
30.01.09 second messenger mediated signal transduction	2	0.74	TRIATDRAFT_171619 TRIATDRAFT_49527	105	0.88	0.840909090909091	1
30.01.09.11 polyphosphoinositol mediated signal transduction	2	0.74	TRIATDRAFT_171619 TRIATDRAFT_49527	34	0.28	2.64285714285714	0.179787010078236
30.05 transmembrane signal transduction	1	0.37	TRIATDRAFT_300154	181	1.53	0.241830065359477	1
30.05.01 receptor enzyme mediated signalling	1	0.37	TRIATDRAFT_300154	61	0.51	0.725490196078431	1
32 CELL RESCUE, DEFENSE AND VIRULENCE	50	18.6	TRIATDRAFT_210911 TRIATDRAFT_254530 TRIATDRAFT_297210 TRIATDRAFT_212010 TRIATDRAFT_50358 TRIATDRAFT_82756 TRIATDRAFT_262121 TRIATDRAFT_156579 TRIATDRAFT_315645 TRIATDRAFT_53554 TRIATDRAFT_298014 TRIATDRAFT_81754 TRIATDRAFT_298369 TRIATDRAFT_44378 TRIATDRAFT_93077 TRIATDRAFT_90295 TRIATDRAFT_291037 TRIATDRAFT_46092 TRIATDRAFT_240908 TRIATDRAFT_256374 TRIATDRAFT_182617 TRIATDRAFT_283564 TRIATDRAFT_…	1269	10.7	1.73831775700935	6.47725289776524e-05
32.01 stress response	22	8.20	TRIATDRAFT_210911 TRIATDRAFT_254530 TRIATDRAFT_297210 TRIATDRAFT_82756 TRIATDRAFT_53554 TRIATDRAFT_298014 TRIATDRAFT_298369 TRIATDRAFT_93077 TRIATDRAFT_291037 TRIATDRAFT_283564 TRIATDRAFT_318229 TRIATDRAFT_219964 TRIATDRAFT_40943 TRIATDRAFT_300063 TRIATDRAFT_300154 TRIATDRAFT_300815 TRIATDRAFT_33651 TRIATDRAFT_185053 TRIATDRAFT_77873 TRIATDRAFT_229184 TRIATDRAFT_29756 TRIATDRAFT_133312	660	5.58	1.46953405017921	0.0452438076647372
32.01.01 oxidative stress response	4	1.49	TRIATDRAFT_210911 TRIATDRAFT_82756 TRIATDRAFT_300063 TRIATDRAFT_77873	109	0.92	1.6195652173913	0.234652454573296
32.01.03 osmotic and salt stress response	2	0.74	TRIATDRAFT_82756 TRIATDRAFT_300815	84	0.71	1.04225352112676	0.571577946267761
32.01.04 pH stress response	2	0.74	TRIATDRAFT_82756 TRIATDRAFT_219964	19	0.16	4.625	0.0680394669947781
32.01.05 heat shock response	3	1.11	TRIATDRAFT_82756 TRIATDRAFT_300154 TRIATDRAFT_133312	53	0.44	2.52272727272727	0.118556555436721
32.01.07 unfolded protein response (e.g. ER quality control)	1	0.37	TRIATDRAFT_133312	79	0.66	0.560606060606061	1
32.01.09 DNA damage response	3	1.11	TRIATDRAFT_300154 TRIATDRAFT_185053 TRIATDRAFT_229184	159	1.34	0.828358208955224	1
32.01.11 nutrient starvation response	4	1.49	TRIATDRAFT_53554 TRIATDRAFT_298014 TRIATDRAFT_291037 TRIATDRAFT_33651	38	0.32	4.65625	0.0104245499434993
32.05 disease, virulence and defense	21	7.83	TRIATDRAFT_212010 TRIATDRAFT_50358 TRIATDRAFT_262121 TRIATDRAFT_156579 TRIATDRAFT_315645 TRIATDRAFT_81754 TRIATDRAFT_44378 TRIATDRAFT_90295 TRIATDRAFT_46092 TRIATDRAFT_240908 TRIATDRAFT_256374 TRIATDRAFT_182617 TRIATDRAFT_264569 TRIATDRAFT_164074 TRIATDRAFT_38111 TRIATDRAFT_79507 TRIATDRAFT_79360 TRIATDRAFT_131396 TRIATDRAFT_246378 TRIATDRAFT_321773 TRIATDRAFT_302952	403	3.41	2.29618768328446	0.000341697608808653
32.05.01 resistance proteins	11	4.10	TRIATDRAFT_212010 TRIATDRAFT_50358 TRIATDRAFT_262121 TRIATDRAFT_315645 TRIATDRAFT_44378 TRIATDRAFT_182617 TRIATDRAFT_264569 TRIATDRAFT_164074 TRIATDRAFT_131396 TRIATDRAFT_246378 TRIATDRAFT_321773	171	1.44	2.84722222222222	0.00178905172790953
32.05.01.01 antibiotic resistance	1	0.37	TRIATDRAFT_164074	13	0.11	3.36363636363636	0.257997741201835
32.05.01.03 chemical agent resistance	4	1.49	TRIATDRAFT_212010 TRIATDRAFT_44378 TRIATDRAFT_131396 TRIATDRAFT_246378	59	0.49	3.04081632653061	0.0445715534921758
32.05.01.03.03 inorganic chemical agent resistance (e.g. heavy metals)	1	0.37	TRIATDRAFT_131396	13	0.11	3.36363636363636	0.257997741201835
32.05.03 defense related proteins	4	1.49	TRIATDRAFT_50358 TRIATDRAFT_256374 TRIATDRAFT_79507 TRIATDRAFT_79360	57	0.48	3.10416666666667	0.0400450600841131
32.05.05 virulence, disease factors	4	1.49	TRIATDRAFT_156579 TRIATDRAFT_81754 TRIATDRAFT_90295 TRIATDRAFT_46092	151	1.27	1.17322834645669	0.448696195311285
32.07 detoxification	20	7.46	TRIATDRAFT_212010 TRIATDRAFT_82756 TRIATDRAFT_262121 TRIATDRAFT_315645 TRIATDRAFT_44378 TRIATDRAFT_256374 TRIATDRAFT_182617 TRIATDRAFT_40134 TRIATDRAFT_264569 TRIATDRAFT_164074 TRIATDRAFT_300063 TRIATDRAFT_318392 TRIATDRAFT_79360 TRIATDRAFT_246378 TRIATDRAFT_247137 TRIATDRAFT_30874 TRIATDRAFT_321773 TRIATDRAFT_77873 TRIATDRAFT_140571 TRIATDRAFT_259826_b	427	3.61	2.06648199445983	0.00174760352644356
32.07.01 detoxification involving cytochrome P450	1	0.37	TRIATDRAFT_79360	46	0.38	0.973684210526316	1
32.07.03 detoxification by modification	2	0.74	TRIATDRAFT_82756 TRIATDRAFT_259826_b	58	0.49	1.51020408163265	0.380189530867353
32.07.05 detoxification by export	11	4.10	TRIATDRAFT_212010 TRIATDRAFT_262121 TRIATDRAFT_315645 TRIATDRAFT_44378 TRIATDRAFT_182617 TRIATDRAFT_264569 TRIATDRAFT_164074 TRIATDRAFT_246378 TRIATDRAFT_247137 TRIATDRAFT_30874 TRIATDRAFT_321773	135	1.14	3.59649122807017	0.00024826103370402
32.07.07 oxygen and radical detoxification	1	0.37	TRIATDRAFT_77873	72	0.60	0.616666666666667	1
32.07.07.03 glutathione conjugation reaction	1	0.37	TRIATDRAFT_77873	19	0.16	2.3125	0.353537182917205
32.07.09 detoxification by degradation	1	0.37	TRIATDRAFT_256374	33	0.27	1.37037037037037	0.531460238510294
32.10 degradation / modification of foreign (exogenous) compounds	1	0.37	TRIATDRAFT_285336	56	0.47	0.787234042553192	1
32.10.09 degradation / modification of foreign (exogenous) ester compounds	1	0.37	TRIATDRAFT_285336	10	0.08	4.625	0.20507798660876
34 INTERACTION WITH THE ENVIRONMENT	21	7.83	TRIATDRAFT_49527 TRIATDRAFT_262365 TRIATDRAFT_173635 TRIATDRAFT_52401 TRIATDRAFT_46228 TRIATDRAFT_298907 TRIATDRAFT_152366 TRIATDRAFT_219964 TRIATDRAFT_300063 TRIATDRAFT_318392 TRIATDRAFT_131293 TRIATDRAFT_131396 TRIATDRAFT_300815 TRIATDRAFT_33651 TRIATDRAFT_246378 TRIATDRAFT_285336 TRIATDRAFT_185053 TRIATDRAFT_32035 TRIATDRAFT_29516 TRIATDRAFT_140571 TRIATDRAFT_41966	759	6.42	1.2196261682243	0.200553775389228
34.01 homeostasis	12	4.47	TRIATDRAFT_52401 TRIATDRAFT_152366 TRIATDRAFT_219964 TRIATDRAFT_300063 TRIATDRAFT_318392 TRIATDRAFT_131293 TRIATDRAFT_131396 TRIATDRAFT_246378 TRIATDRAFT_32035 TRIATDRAFT_29516 TRIATDRAFT_140571 TRIATDRAFT_41966	286	2.42	1.84710743801653	0.0300360023719557
34.01.01 homeostasis of cations	10	3.73	TRIATDRAFT_52401 TRIATDRAFT_152366 TRIATDRAFT_219964 TRIATDRAFT_300063 TRIATDRAFT_131293 TRIATDRAFT_131396 TRIATDRAFT_246378 TRIATDRAFT_32035 TRIATDRAFT_29516 TRIATDRAFT_140571	248	2.09	1.78468899521531	0.056378736418196
34.01.01.01 homeostasis of metal ions (Na, K, Ca etc.)	9	3.35	TRIATDRAFT_52401 TRIATDRAFT_152366 TRIATDRAFT_219964 TRIATDRAFT_300063 TRIATDRAFT_131293 TRIATDRAFT_131396 TRIATDRAFT_246378 TRIATDRAFT_32035 TRIATDRAFT_140571	172	1.45	2.31034482758621	0.0165537663321652
34.01.01.03 homeostasis of protons	1	0.37	TRIATDRAFT_131293	61	0.51	0.725490196078431	1
34.01.03 homeostasis of anions	3	1.11	TRIATDRAFT_318392 TRIATDRAFT_29516 TRIATDRAFT_41966	31	0.26	4.26923076923077	0.0324902172964724
34.01.03.01 homeostasis of sulfate	1	0.37	TRIATDRAFT_41966	5	0.04	9.25	0.108394102441876
34.01.03.05 homeostasis of chloride	2	0.74	TRIATDRAFT_318392 TRIATDRAFT_29516	9	0.07	10.5714285714286	0.0166082228607894
34.03 membrane excitability	1	0.37	TRIATDRAFT_285336	33	0.27	1.37037037037037	0.531460238510294
34.03.01 synaptic transmission	1	0.37	TRIATDRAFT_285336	30	0.25	1.48	0.497984516272143
34.03.03 regulation, generation and propagation of action potential	1	0.37	TRIATDRAFT_285336	18	0.15	2.46666666666667	0.338510987342341
34.05 cell motility	2	0.74	TRIATDRAFT_131293 TRIATDRAFT_185053	153	1.29	0.573643410852713	1
34.05.01 cell migration	1	0.37	TRIATDRAFT_185053	98	0.82	0.451219512195122	1
34.07 cell adhesion	1	0.37	TRIATDRAFT_298907	35	0.29	1.27586206896552	0.552532267241286
34.07.02 cell-matrix adhesion	1	0.37	TRIATDRAFT_298907	12	0.10	3.7	0.240759824648618
34.11 cellular sensing and response to external stimulus	9	3.35	TRIATDRAFT_49527 TRIATDRAFT_262365 TRIATDRAFT_173635 TRIATDRAFT_46228 TRIATDRAFT_152366 TRIATDRAFT_131293 TRIATDRAFT_300815 TRIATDRAFT_33651 TRIATDRAFT_32035	316	2.67	1.25468164794007	0.290094244541802
34.11.01 photoperception and response	1	0.37	TRIATDRAFT_46228	59	0.49	0.755102040816326	1
34.11.03 chemoperception and response	3	1.11	TRIATDRAFT_49527 TRIATDRAFT_152366 TRIATDRAFT_300815	140	1.18	0.940677966101695	1
34.11.03.13 osmosensing and response	2	0.74	TRIATDRAFT_49527 TRIATDRAFT_300815	56	0.47	1.57446808510638	0.363873506025635
34.11.12 perception of nutrients and nutritional adaptation	3	1.11	TRIATDRAFT_262365 TRIATDRAFT_152366 TRIATDRAFT_33651	69	0.58	1.91379310344828	0.205990475498388
34.11.13 gas and metabolite distribution	1	0.37	TRIATDRAFT_131293	9	0.07	5.28571428571429	0.186615459562321
34.11.13.07 circulation (e.g. blood pressure)	1	0.37	TRIATDRAFT_131293	8	0.06	6.16666666666667	0.167725766595485
38 TRANSPOSABLE ELEMENTS, VIRAL AND PLASMID PROTEINS	1	0.37	TRIATDRAFT_33651	11	0.09	4.11111111111111	0.223122972174477
38.05 viral proteins	1	0.37	TRIATDRAFT_33651	5	0.04	9.25	0.108394102441876
40 CELL FATE	9	3.35	TRIATDRAFT_210911 TRIATDRAFT_214400 TRIATDRAFT_298266 TRIATDRAFT_298907 TRIATDRAFT_37606 TRIATDRAFT_33651 TRIATDRAFT_300712 TRIATDRAFT_185053 TRIATDRAFT_130756	534	4.51	0.742793791574279	1
40.01 cell growth / morphogenesis	4	1.49	TRIATDRAFT_214400 TRIATDRAFT_298907 TRIATDRAFT_300712 TRIATDRAFT_185053	380	3.21	0.46417445482866	1
40.01.03 directional cell growth (morphogenesis)	2	0.74	TRIATDRAFT_298907 TRIATDRAFT_185053	138	1.16	0.637931034482759	1
40.01.03.03 guidance of longitudinal cell extension (e.g. pollen tube guidance, axonal pathfinding)	1	0.37	TRIATDRAFT_185053	67	0.56	0.660714285714286	1
40.10 cell death	6	2.23	TRIATDRAFT_210911 TRIATDRAFT_298266 TRIATDRAFT_298907 TRIATDRAFT_37606 TRIATDRAFT_33651 TRIATDRAFT_130756	152	1.28	1.7421875	0.131897240059047
40.10.02 apoptosis (type I programmed cell death)	6	2.23	TRIATDRAFT_210911 TRIATDRAFT_298266 TRIATDRAFT_298907 TRIATDRAFT_37606 TRIATDRAFT_33651 TRIATDRAFT_130756	138	1.16	1.92241379310345	0.0940223039671678
40.10.02.02 apoptotic program	1	0.37	TRIATDRAFT_130756	26	0.22	1.68181818181818	0.449615758234293
40.10.02.02.01 apoptotic mitochondrial changes	1	0.37	TRIATDRAFT_130756	8	0.06	6.16666666666667	0.167725766595485
40.10.02.03 induction of apoptosis	2	0.74	TRIATDRAFT_210911 TRIATDRAFT_33651	28	0.23	3.21739130434783	0.131983952063926
41 DEVELOPMENT (Systemic)	4	1.49	TRIATDRAFT_214400 TRIATDRAFT_44123 TRIATDRAFT_283564 TRIATDRAFT_161811	103	0.87	1.71264367816092	0.205834566283652
41.01 fungal/microorganismic development	4	1.49	TRIATDRAFT_214400 TRIATDRAFT_44123 TRIATDRAFT_283564 TRIATDRAFT_161811	103	0.87	1.71264367816092	0.205834566283652
41.01.01 mating (fertilization)	2	0.74	TRIATDRAFT_283564 TRIATDRAFT_161811	39	0.33	2.24242424242424	0.221285015048499
41.01.03 tissue pattern formation	1	0.37	TRIATDRAFT_214400	20	0.16	2.3125	0.368223292519494
41.01.03.01 fruit body development (sexually or asexually derived spores)	1	0.37	TRIATDRAFT_214400	18	0.15	2.46666666666667	0.338510987342341
42 BIOGENESIS OF CELLULAR COMPONENTS	22	8.20	TRIATDRAFT_50358 TRIATDRAFT_171619 TRIATDRAFT_49527 TRIATDRAFT_143748 TRIATDRAFT_214583 TRIATDRAFT_298014 TRIATDRAFT_298169 TRIATDRAFT_170067 TRIATDRAFT_217415 TRIATDRAFT_298907 TRIATDRAFT_218164 TRIATDRAFT_43222 TRIATDRAFT_256374 TRIATDRAFT_292317 TRIATDRAFT_300154 TRIATDRAFT_79507 TRIATDRAFT_79473 TRIATDRAFT_185053 TRIATDRAFT_130756 TRIATDRAFT_147940 TRIATDRAFT_228302 TRIATDRAFT_302891	1124	9.51	0.862250262881178	0.797693111696794
42.01 cell wall	8	2.98	TRIATDRAFT_143748 TRIATDRAFT_214583 TRIATDRAFT_170067 TRIATDRAFT_217415 TRIATDRAFT_298907 TRIATDRAFT_218164 TRIATDRAFT_292317 TRIATDRAFT_79473	254	2.14	1.39252336448598	0.22010966495653
42.02 eukaryotic plasma membrane	2	0.74	TRIATDRAFT_49527 TRIATDRAFT_298014	21	0.17	4.35294117647059	0.0811494410363197
42.04 cytoskeleton/structural proteins	3	1.11	TRIATDRAFT_298907 TRIATDRAFT_185053 TRIATDRAFT_147940	295	2.49	0.44578313253012	1
42.04.03 actin cytoskeleton	2	0.74	TRIATDRAFT_298907 TRIATDRAFT_147940	109	0.92	0.804347826086956	1
42.07 endoplasmic reticulum	1	0.37	TRIATDRAFT_302891	8	0.06	6.16666666666667	0.167725766595485
42.08 Golgi	1	0.37	TRIATDRAFT_171619	16	0.13	2.84615384615385	0.307406777242057
42.10 nucleus	2	0.74	TRIATDRAFT_298169 TRIATDRAFT_300154	303	2.56	0.2890625	1
42.10.03 organization of chromosome structure	2	0.74	TRIATDRAFT_298169 TRIATDRAFT_300154	261	2.20	0.336363636363636	1
42.16 mitochondrion	4	1.49	TRIATDRAFT_50358 TRIATDRAFT_256374 TRIATDRAFT_130756 TRIATDRAFT_228302	158	1.33	1.1203007518797	0.483537406081237
42.25 vacuole or lysosome	1	0.37	TRIATDRAFT_43222	68	0.57	0.649122807017544	1
42.27 extracellular / secretion proteins	1	0.37	TRIATDRAFT_79507	27	0.22	1.68181818181818	0.462126612924132
42.29 bud / growth tip	1	0.37	TRIATDRAFT_298907	26	0.22	1.68181818181818	0.449615758234293
43 CELL TYPE DIFFERENTIATION	8	2.98	TRIATDRAFT_156579 TRIATDRAFT_291037 TRIATDRAFT_46092 TRIATDRAFT_298907 TRIATDRAFT_131981 TRIATDRAFT_88424 TRIATDRAFT_33651 TRIATDRAFT_168477	569	4.81	0.619542619542619	1
43.01 fungal/microorganismic cell type differentiation	8	2.98	TRIATDRAFT_156579 TRIATDRAFT_291037 TRIATDRAFT_46092 TRIATDRAFT_298907 TRIATDRAFT_131981 TRIATDRAFT_88424 TRIATDRAFT_33651 TRIATDRAFT_168477	569	4.81	0.619542619542619	1
43.01.03 fungal and other eukaryotic cell type differentiation	8	2.98	TRIATDRAFT_156579 TRIATDRAFT_291037 TRIATDRAFT_46092 TRIATDRAFT_298907 TRIATDRAFT_131981 TRIATDRAFT_88424 TRIATDRAFT_33651 TRIATDRAFT_168477	569	4.81	0.619542619542619	1
43.01.03.05 budding, cell polarity and filament formation	1	0.37	TRIATDRAFT_298907	270	2.28	0.162280701754386	1
43.01.03.07 development of conidia	1	0.37	TRIATDRAFT_168477	13	0.11	3.36363636363636	0.257997741201835
43.01.03.09 development of asco- basidio- or zygospore	4	1.49	TRIATDRAFT_291037 TRIATDRAFT_131981 TRIATDRAFT_88424 TRIATDRAFT_33651	179	1.51	0.986754966887417	1
99 UNCLASSIFIED PROTEINS	89	33.2	TRIATDRAFT_210245 TRIATDRAFT_94195 TRIATDRAFT_288710 TRIATDRAFT_279848 TRIATDRAFT_314449 TRIATDRAFT_297265 TRIATDRAFT_314865 TRIATDRAFT_314657 TRIATDRAFT_129459 TRIATDRAFT_270635 TRIATDRAFT_82772 TRIATDRAFT_281230 TRIATDRAFT_134071 TRIATDRAFT_298089 TRIATDRAFT_298116 TRIATDRAFT_262763 TRIATDRAFT_255747 TRIATDRAFT_178867 TRIATDRAFT_316576 TRIATDRAFT_90220 TRIATDRAFT_282317 TRIATDRAFT_44568 TRIATDR…	5396	45.6	0.728070175438597	0.9999895485188

## Sheet: FunCat 2fold
Functional category analysis of all genes with statistically significant regulation (>2fold regulation, p-value <0.01)
FUNCTIONAL CATEGORY	abs SET	rel SET	genes SET	abs GENOME	rel GENOME	rel SET/rel GENOME	P-VALUE
01 METABOLISM	27	49.0	TRIATDRAFT_210728 TRIATDRAFT_261131 TRIATDRAFT_49527 TRIATDRAFT_49607 TRIATDRAFT_315645 TRIATDRAFT_290086 TRIATDRAFT_262365 TRIATDRAFT_305582 TRIATDRAFT_214400 TRIATDRAFT_52312 TRIATDRAFT_93077 TRIATDRAFT_217415 TRIATDRAFT_256104 TRIATDRAFT_291159 TRIATDRAFT_292305 TRIATDRAFT_264569 TRIATDRAFT_292317 TRIATDRAFT_16857 TRIATDRAFT_300064 TRIATDRAFT_257930 TRIATDRAFT_79360 TRIATDRAFT_319832 TRIATDRAF…	3729	31.5	1.55555555555556	0.00490661671421764
01.01 amino acid metabolism	5	9.09	TRIATDRAFT_49607 TRIATDRAFT_291159 TRIATDRAFT_292305 TRIATDRAFT_319832 TRIATDRAFT_147737	540	4.57	1.9890590809628	0.105424274220853
01.01.03 assimilation of ammonia, metabolism of the glutamate group	1	1.81	TRIATDRAFT_291159	103	0.87	2.08045977011494	0.382851181744645
01.01.06 metabolism of the aspartate family	2	3.63	TRIATDRAFT_319832 TRIATDRAFT_147737	119	1.00	3.63	0.105905417863075
01.01.06.04 metabolism of threonine	1	1.81	TRIATDRAFT_147737	14	0.11	16.4545454545455	0.0632642523048577
01.01.06.04.02 degradation of threonine	1	1.81	TRIATDRAFT_147737	8	0.06	30.1666666666667	0.0366472829814784
01.01.06.06 metabolism of lysine	1	1.81	TRIATDRAFT_319832	43	0.36	5.02777777777778	0.182069457440201
01.01.06.06.01 biosynthesis of lysine	1	1.81	TRIATDRAFT_319832	24	0.20	9.05	0.106030048643086
01.01.06.06.01.03 aminoadipic acid pathway	1	1.81	TRIATDRAFT_319832	10	0.08	22.625	0.045601083086916
01.01.09 metabolism of the cysteine - aromatic group	2	3.63	TRIATDRAFT_49607 TRIATDRAFT_292305	208	1.76	2.0625	0.252378909735727
01.01.09.04 metabolism of phenylalanine	1	1.81	TRIATDRAFT_292305	60	0.50	3.62	0.244697712328775
01.01.09.04.02 degradation of phenylalanine	1	1.81	TRIATDRAFT_292305	30	0.25	7.24	0.130763136385366
01.01.09.05 metabolism of tyrosine	1	1.81	TRIATDRAFT_292305	46	0.38	4.76315789473684	0.193480346151787
01.01.09.05.02 degradation of tyrosine	1	1.81	TRIATDRAFT_292305	18	0.15	12.0666666666667	0.0806063625819492
01.01.11 metabolism of the pyruvate family (alanine, isoleucine, leucine, valine) and D-alanine	1	1.81	TRIATDRAFT_319832	66	0.55	3.29090909090909	0.265657597083814
01.02 nitrogen, sulfur and selenium metabolism	4	7.27	TRIATDRAFT_305582 TRIATDRAFT_256104 TRIATDRAFT_291159 TRIATDRAFT_257930	287	2.42	3.00413223140496	0.0442223485489261
01.02.02 nitrogen metabolism	1	1.81	TRIATDRAFT_257930	68	0.57	3.17543859649123	0.272516493403958
01.02.02.09 catabolism of nitrogenous compounds	1	1.81	TRIATDRAFT_257930	37	0.31	5.83870967741935	0.158770114520554
01.03 nucleotide/nucleoside/nucleobase metabolism	1	1.81	TRIATDRAFT_257930	410	3.46	0.523121387283237	0.857278123832197
01.03.01 purin nucleotide/nucleoside/nucleobase metabolism	1	1.81	TRIATDRAFT_257930	154	1.30	1.39230769230769	0.514803657114155
01.04 phosphate metabolism	1	1.81	TRIATDRAFT_93077	596	5.04	0.359126984126984	0.942346972803403
01.05 C-compound and carbohydrate metabolism	15	27.2	TRIATDRAFT_261131 TRIATDRAFT_49527 TRIATDRAFT_305582 TRIATDRAFT_52312 TRIATDRAFT_93077 TRIATDRAFT_217415 TRIATDRAFT_292305 TRIATDRAFT_292317 TRIATDRAFT_16857 TRIATDRAFT_300064 TRIATDRAFT_257930 TRIATDRAFT_319832 TRIATDRAFT_285321 TRIATDRAFT_147737 TRIATDRAFT_228302	1455	12.3	2.21138211382114	0.00207325543667462
01.05.02 sugar, glucoside, polyol and carboxylate metabolism	2	3.63	TRIATDRAFT_49527 TRIATDRAFT_93077	272	2.30	1.57826086956522	0.362417240093172
01.05.02.04 sugar, glucoside, polyol and carboxylate anabolism	1	1.81	TRIATDRAFT_93077	81	0.68	2.66176470588235	0.315590967081731
01.05.02.07 sugar, glucoside, polyol and carboxylate catabolism	2	3.63	TRIATDRAFT_49527 TRIATDRAFT_93077	194	1.64	2.21341463414634	0.22821753811614
01.05.03 polysaccharide metabolism	3	5.45	TRIATDRAFT_93077 TRIATDRAFT_217415 TRIATDRAFT_16857	237	2.00	2.725	0.0979397437686359
01.05.06 C-2 compound and organic acid metabolism	2	3.63	TRIATDRAFT_300064 TRIATDRAFT_147737	39	0.33	11	0.0141193017736273
01.05.06.07 C-2 compound and organic acid catabolism	2	3.63	TRIATDRAFT_300064 TRIATDRAFT_147737	32	0.27	13.4444444444444	0.0096491082997979
01.05.11 aromate metabolism	1	1.81	TRIATDRAFT_292305	91	0.77	2.35064935064935	0.347011737568707
01.05.11.07 aromate catabolism	1	1.81	TRIATDRAFT_292305	67	0.56	3.23214285714286	0.269094944501719
01.05.11.07.01 aerobic aromate catabolism	1	1.81	TRIATDRAFT_292305	65	0.55	3.29090909090909	0.26220437955984
01.05.25 regulation of C-compound and carbohydrate metabolism	2	3.63	TRIATDRAFT_305582 TRIATDRAFT_228302	192	1.62	2.24074074074074	0.22477949330587
01.06 lipid, fatty acid and isoprenoid metabolism	3	5.45	TRIATDRAFT_290086 TRIATDRAFT_291159 TRIATDRAFT_300064	792	6.70	0.813432835820896	0.722875167829356
01.06.05 fatty acid metabolism	1	1.81	TRIATDRAFT_291159	138	1.16	1.56034482758621	0.47671006116752
01.06.06 isoprenoid metabolism	2	3.63	TRIATDRAFT_290086 TRIATDRAFT_291159	158	1.33	2.72932330827068	0.167346743141137
01.06.06.11 tetracyclic and pentacyclic triterpenes (cholesterin, steroids and hopanoids) metabolism	1	1.81	TRIATDRAFT_291159	120	1.01	1.79207920792079	0.430338957637785
01.20 secondary metabolism	13	23.6	TRIATDRAFT_210728 TRIATDRAFT_49607 TRIATDRAFT_315645 TRIATDRAFT_290086 TRIATDRAFT_262365 TRIATDRAFT_214400 TRIATDRAFT_52312 TRIATDRAFT_292305 TRIATDRAFT_264569 TRIATDRAFT_292317 TRIATDRAFT_79360 TRIATDRAFT_321773 TRIATDRAFT_91854	1321	11.1	2.12612612612613	0.00653101589814536
01.20.35 metabolism of secondary products derived from L-phenylalanine and L-tyrosine	1	1.81	TRIATDRAFT_292317	51	0.43	4.2093023255814	0.212152116341062
01.20.35.01 metabolism of phenylpropanoids	1	1.81	TRIATDRAFT_292317	43	0.36	5.02777777777778	0.182069457440201
02 ENERGY	7	12.7	TRIATDRAFT_93077 TRIATDRAFT_256104 TRIATDRAFT_292317 TRIATDRAFT_300064 TRIATDRAFT_257930 TRIATDRAFT_285321 TRIATDRAFT_147737	635	5.37	2.36499068901304	0.0270370990484514
02.01 glycolysis and gluconeogenesis	3	5.45	TRIATDRAFT_300064 TRIATDRAFT_257930 TRIATDRAFT_147737	120	1.01	5.3960396039604	0.0182700427104696
02.13 respiration	1	1.81	TRIATDRAFT_256104	173	1.46	1.23972602739726	0.556514616009108
02.13.01 anaerobic respiration	1	1.81	TRIATDRAFT_256104	10	0.08	22.625	0.045601083086916
02.16 fermentation	4	7.27	TRIATDRAFT_292317 TRIATDRAFT_300064 TRIATDRAFT_285321 TRIATDRAFT_147737	106	0.89	8.1685393258427	0.00146847334041947
02.16.01 alcohol fermentation	3	5.45	TRIATDRAFT_292317 TRIATDRAFT_300064 TRIATDRAFT_285321	60	0.50	10.9	0.00270713949483127
02.16.11 propionate fermentation	1	1.81	TRIATDRAFT_147737	5	0.04	45.25	0.0230617382114673
02.19 metabolism of energy reserves (e.g. glycogen, trehalose)	1	1.81	TRIATDRAFT_93077	57	0.48	3.77083333333333	0.233998619031527
02.45 energy conversion and regeneration	1	1.81	TRIATDRAFT_257930	96	0.81	2.23456790123457	0.362186581224941
16 PROTEIN WITH BINDING FUNCTION OR COFACTOR REQUIREMENT (structural or catalytic)	9	16.3	TRIATDRAFT_50358 TRIATDRAFT_49527 TRIATDRAFT_52312 TRIATDRAFT_256104 TRIATDRAFT_291159 TRIATDRAFT_292317 TRIATDRAFT_300064 TRIATDRAFT_79360 TRIATDRAFT_285321	2998	25.3	0.644268774703557	0.960449091800482
16.17 metal binding	4	7.27	TRIATDRAFT_256104 TRIATDRAFT_292317 TRIATDRAFT_300064 TRIATDRAFT_285321	697	5.89	1.23429541595925	0.409042609478133
16.17.09 heavy metal binding (Cu, Fe, Zn)	4	7.27	TRIATDRAFT_256104 TRIATDRAFT_292317 TRIATDRAFT_300064 TRIATDRAFT_285321	450	3.80	1.91315789473684	0.156551109914633
16.19 nucleotide/nucleoside/nucleobase binding	1	1.81	TRIATDRAFT_50358	851	7.20	0.251388888888889	0.983768867504358
16.19.05 GTP binding	1	1.81	TRIATDRAFT_50358	128	1.08	1.67592592592593	0.451426223908263
16.21 complex cofactor/cosubstrate/vitamine binding	5	9.09	TRIATDRAFT_49527 TRIATDRAFT_52312 TRIATDRAFT_256104 TRIATDRAFT_291159 TRIATDRAFT_79360	436	3.68	2.47010869565217	0.0514885339228969
16.21.01 heme binding	2	3.63	TRIATDRAFT_291159 TRIATDRAFT_79360	57	0.48	7.5625	0.0288372068712399
16.21.05 FAD/FMN binding	3	5.45	TRIATDRAFT_52312 TRIATDRAFT_256104 TRIATDRAFT_291159	122	1.03	5.29126213592233	0.0190826988653515
16.21.07 NAD/NADP binding	2	3.63	TRIATDRAFT_49527 TRIATDRAFT_291159	210	1.77	2.05084745762712	0.25583995329607
18 REGULATION OF METABOLISM AND PROTEIN FUNCTION	1	1.81	TRIATDRAFT_93077	523	4.42	0.409502262443439	0.917567058223193
18.02 regulation of protein activity	1	1.81	TRIATDRAFT_93077	512	4.33	0.418013856812933	0.913021544930575
18.02.01 enzymatic activity regulation / enzyme regulator	1	1.81	TRIATDRAFT_93077	315	2.66	0.680451127819549	0.774533472435515
20 CELLULAR TRANSPORT, TRANSPORT FACILITIES AND TRANSPORT ROUTES	13	23.6	TRIATDRAFT_49607 TRIATDRAFT_315645 TRIATDRAFT_262365 TRIATDRAFT_305582 TRIATDRAFT_214400 TRIATDRAFT_44378 TRIATDRAFT_46092 TRIATDRAFT_291159 TRIATDRAFT_264569 TRIATDRAFT_32035 TRIATDRAFT_321773 TRIATDRAFT_228302 TRIATDRAFT_91854	1732	14.6	1.61643835616438	0.0513161784097944
20.01 transported compounds (substrates)	13	23.6	TRIATDRAFT_49607 TRIATDRAFT_315645 TRIATDRAFT_262365 TRIATDRAFT_305582 TRIATDRAFT_214400 TRIATDRAFT_44378 TRIATDRAFT_46092 TRIATDRAFT_291159 TRIATDRAFT_264569 TRIATDRAFT_32035 TRIATDRAFT_321773 TRIATDRAFT_228302 TRIATDRAFT_91854	1311	11.0	2.14545454545455	0.00612816266534118
20.01.01 ion transport	3	5.45	TRIATDRAFT_305582 TRIATDRAFT_32035 TRIATDRAFT_228302	265	2.24	2.43303571428571	0.125498973247882
20.01.01.01 cation transport (H+, Na+, K+, Ca2+ , NH4+, etc.)	2	3.63	TRIATDRAFT_305582 TRIATDRAFT_32035	218	1.84	1.97282608695652	0.269694567650283
20.01.01.01.01 heavy metal ion transport (Cu+, Fe3+, etc.)	1	1.81	TRIATDRAFT_32035	79	0.66	2.74242424242424	0.309130989689597
20.01.01.01.01.01 siderophore-iron transport	1	1.81	TRIATDRAFT_32035	35	0.29	6.24137931034483	0.150859806897021
20.01.01.07 anion transport	1	1.81	TRIATDRAFT_228302	53	0.44	4.11363636363636	0.219501403469834
20.01.03 C-compound and carbohydrate transport	3	5.45	TRIATDRAFT_46092 TRIATDRAFT_228302 TRIATDRAFT_91854	229	1.93	2.82383419689119	0.0905817722761083
20.01.03.03 C4-dicarboxylate transport (e.g. malate, succinate, fumarate)	1	1.81	TRIATDRAFT_228302	12	0.10	18.1	0.0544731621356905
20.01.07 amino acid/amino acid derivatives transport	1	1.81	TRIATDRAFT_262365	72	0.60	3.01666666666667	0.286046124602334
20.01.11 amine / polyamine transport	1	1.81	TRIATDRAFT_264569	41	0.34	5.32352941176471	0.174374292845181
20.01.15 electron transport	3	5.45	TRIATDRAFT_49607 TRIATDRAFT_214400 TRIATDRAFT_291159	310	2.62	2.08015267175573	0.17478725315177
20.01.23 allantoin and allantoate transport	1	1.81	TRIATDRAFT_91854	51	0.43	4.2093023255814	0.212152116341062
20.01.25 vitamine/cofactor transport	1	1.81	TRIATDRAFT_91854	56	0.47	3.85106382978723	0.230399296011171
20.01.27 drug/toxin transport	4	7.27	TRIATDRAFT_315645 TRIATDRAFT_44378 TRIATDRAFT_264569 TRIATDRAFT_321773	171	1.44	5.04861111111111	0.00813904132016505
20.03 transport facilities	9	16.3	TRIATDRAFT_315645 TRIATDRAFT_305582 TRIATDRAFT_44378 TRIATDRAFT_46092 TRIATDRAFT_264569 TRIATDRAFT_32035 TRIATDRAFT_321773 TRIATDRAFT_228302 TRIATDRAFT_91854	648	5.48	2.97445255474453	0.00279559634438157
20.03.02 carrier (electrochemical potential-driven transport)	4	7.27	TRIATDRAFT_315645 TRIATDRAFT_305582 TRIATDRAFT_321773 TRIATDRAFT_228302	119	1.00	7.27	0.00224497617596178
20.03.02.03 antiporter	4	7.27	TRIATDRAFT_315645 TRIATDRAFT_305582 TRIATDRAFT_321773 TRIATDRAFT_228302	71	0.60	12.1166666666667	0.000323931757065124
20.03.02.03.01 proton driven antiporter	3	5.45	TRIATDRAFT_315645 TRIATDRAFT_305582 TRIATDRAFT_321773	51	0.43	12.6744186046512	0.00169681353599578
20.03.25 ABC transporters	1	1.81	TRIATDRAFT_44378	93	0.78	2.32051282051282	0.353123745213059
20.09 transport routes	7	12.7	TRIATDRAFT_315645 TRIATDRAFT_44378 TRIATDRAFT_264569 TRIATDRAFT_32035 TRIATDRAFT_321773 TRIATDRAFT_228302 TRIATDRAFT_91854	1125	9.52	1.33403361344538	0.26673914730587
20.09.04 mitochondrial transport	1	1.81	TRIATDRAFT_228302	114	0.96	1.88541666666667	0.414003179422763
20.09.16 cellular export and secretion	4	7.27	TRIATDRAFT_315645 TRIATDRAFT_44378 TRIATDRAFT_264569 TRIATDRAFT_321773	259	2.19	3.31963470319635	0.0321601928744389
20.09.18 cellular import	2	3.63	TRIATDRAFT_32035 TRIATDRAFT_91854	412	3.48	1.04310344827586	0.576451990687131
20.09.18.07 non-vesicular cellular import	1	1.81	TRIATDRAFT_91854	193	1.63	1.11042944785276	0.596617161863652
30 CELLULAR COMMUNICATION/SIGNAL TRANSDUCTION MECHANISM	2	3.63	TRIATDRAFT_49527 TRIATDRAFT_46092	603	5.10	0.711764705882353	0.778745112963474
30.01 cellular signalling	2	3.63	TRIATDRAFT_49527 TRIATDRAFT_46092	522	4.41	0.82312925170068	0.705577237443801
30.01.09 second messenger mediated signal transduction	1	1.81	TRIATDRAFT_49527	105	0.88	2.05681818181818	0.388633634546438
30.01.09.11 polyphosphoinositol mediated signal transduction	1	1.81	TRIATDRAFT_49527	34	0.28	6.46428571428571	0.146877312600043
32 CELL RESCUE, DEFENSE AND VIRULENCE	8	14.5	TRIATDRAFT_50358 TRIATDRAFT_315645 TRIATDRAFT_44378 TRIATDRAFT_93077 TRIATDRAFT_46092 TRIATDRAFT_264569 TRIATDRAFT_79360 TRIATDRAFT_321773	1269	10.7	1.35514018691589	0.234110609984217
32.01 stress response	1	1.81	TRIATDRAFT_93077	660	5.58	0.324372759856631	0.957941675781142
32.05 disease, virulence and defense	7	12.7	TRIATDRAFT_50358 TRIATDRAFT_315645 TRIATDRAFT_44378 TRIATDRAFT_46092 TRIATDRAFT_264569 TRIATDRAFT_79360 TRIATDRAFT_321773	403	3.41	3.72434017595308	0.00251778865503094
32.05.01 resistance proteins	5	9.09	TRIATDRAFT_50358 TRIATDRAFT_315645 TRIATDRAFT_44378 TRIATDRAFT_264569 TRIATDRAFT_321773	171	1.44	6.3125	0.00116075747092863
32.05.01.03 chemical agent resistance	1	1.81	TRIATDRAFT_44378	59	0.49	3.69387755102041	0.241147752849889
32.05.03 defense related proteins	2	3.63	TRIATDRAFT_50358 TRIATDRAFT_79360	57	0.48	7.5625	0.0288372068712399
32.05.05 virulence, disease factors	1	1.81	TRIATDRAFT_46092	151	1.27	1.4251968503937	0.507874784328517
32.07 detoxification	5	9.09	TRIATDRAFT_315645 TRIATDRAFT_44378 TRIATDRAFT_264569 TRIATDRAFT_79360 TRIATDRAFT_321773	427	3.61	2.51800554016621	0.0478307456095863
32.07.01 detoxification involving cytochrome P450	1	1.81	TRIATDRAFT_79360	46	0.38	4.76315789473684	0.193480346151787
32.07.05 detoxification by export	4	7.27	TRIATDRAFT_315645 TRIATDRAFT_44378 TRIATDRAFT_264569 TRIATDRAFT_321773	135	1.14	6.37719298245614	0.00354165072955092
34 INTERACTION WITH THE ENVIRONMENT	3	5.45	TRIATDRAFT_49527 TRIATDRAFT_262365 TRIATDRAFT_32035	759	6.42	0.848909657320872	0.695109299027405
34.01 homeostasis	1	1.81	TRIATDRAFT_32035	286	2.42	0.747933884297521	0.740953770807472
34.01.01 homeostasis of cations	1	1.81	TRIATDRAFT_32035	248	2.09	0.866028708133971	0.68943315344065
34.01.01.01 homeostasis of metal ions (Na, K, Ca etc.)	1	1.81	TRIATDRAFT_32035	172	1.45	1.24827586206897	0.554409887721983
34.11 cellular sensing and response to external stimulus	3	5.45	TRIATDRAFT_49527 TRIATDRAFT_262365 TRIATDRAFT_32035	316	2.67	2.04119850187266	0.181742228400947
34.11.03 chemoperception and response	1	1.81	TRIATDRAFT_49527	140	1.18	1.53389830508475	0.481627752252467
34.11.03.13 osmosensing and response	1	1.81	TRIATDRAFT_49527	56	0.47	3.85106382978723	0.230399296011171
34.11.12 perception of nutrients and nutritional adaptation	1	1.81	TRIATDRAFT_262365	69	0.58	3.12068965517241	0.275922315064052
40 CELL FATE	1	1.81	TRIATDRAFT_214400	534	4.51	0.401330376940133	0.92187911826847
40.01 cell growth / morphogenesis	1	1.81	TRIATDRAFT_214400	380	3.21	0.56386292834891	0.835038644264931
41 DEVELOPMENT (Systemic)	1	1.81	TRIATDRAFT_214400	103	0.87	2.08045977011494	0.382851181744645
41.01 fungal/microorganismic development	1	1.81	TRIATDRAFT_214400	103	0.87	2.08045977011494	0.382851181744645
41.01.03 tissue pattern formation	1	1.81	TRIATDRAFT_214400	20	0.16	11.3125	0.0891588150794197
41.01.03.01 fruit body development (sexually or asexually derived spores)	1	1.81	TRIATDRAFT_214400	18	0.15	12.0666666666667	0.0806063625819492
42 BIOGENESIS OF CELLULAR COMPONENTS	5	9.09	TRIATDRAFT_50358 TRIATDRAFT_49527 TRIATDRAFT_217415 TRIATDRAFT_292317 TRIATDRAFT_228302	1124	9.51	0.95583596214511	0.610003203789742
42.01 cell wall	2	3.63	TRIATDRAFT_217415 TRIATDRAFT_292317	254	2.14	1.69626168224299	0.331811141959799
42.02 eukaryotic plasma membrane	1	1.81	TRIATDRAFT_49527	21	0.17	10.6470588235294	0.0934057009026336
42.16 mitochondrion	2	3.63	TRIATDRAFT_50358 TRIATDRAFT_228302	158	1.33	2.72932330827068	0.167346743141137
43 CELL TYPE DIFFERENTIATION	2	3.63	TRIATDRAFT_46092 TRIATDRAFT_168477	569	4.81	0.754677754677755	0.750143046856791
43.01 fungal/microorganismic cell type differentiation	2	3.63	TRIATDRAFT_46092 TRIATDRAFT_168477	569	4.81	0.754677754677755	0.750143046856791
43.01.03 fungal and other eukaryotic cell type differentiation	2	3.63	TRIATDRAFT_46092 TRIATDRAFT_168477	569	4.81	0.754677754677755	0.750143046856791
43.01.03.07 development of conidia	1	1.81	TRIATDRAFT_168477	13	0.11	16.4545454545455	0.0588787853212662
99 UNCLASSIFIED PROTEINS	23	41.8	TRIATDRAFT_314449 TRIATDRAFT_298116 TRIATDRAFT_90220 TRIATDRAFT_238926 TRIATDRAFT_45850 TRIATDRAFT_46094 TRIATDRAFT_46589 TRIATDRAFT_142240 TRIATDRAFT_43953 TRIATDRAFT_41118 TRIATDRAFT_80087 TRIATDRAFT_138765 TRIATDRAFT_300603 TRIATDRAFT_37053 TRIATDRAFT_320332 TRIATDRAFT_32968 TRIATDRAFT_300751 TRIATDRAFT_29536 TRIATDRAFT_228398 TRIATDRAFT_320974 TRIATDRAFT_268486 TRIATDRAFT_42039 TRIATDRAFT_253…	5396	45.6	0.916666666666667	0.760372774779685

## Sheet: analysis data
gene	B97plant...B97alone	p-value	X65442_B97_P1	X65443_B97_P2	X65444_B97_P3	X65445_B97_A1	X65446_B97_A2	X65447_B97_A3
5	0.542518	0.340673	-4.34786	-5.93283	-5.93283	-5.93283	-5.93283	-5.93283
49	-1.23578	0.0921692	-5.93283	-4.34786	-4.34786	-3.52999	-4.34786	-3.06504
77	-1.77636e-15	1	-5.93283	-5.93283	-5.93283	-5.93283	-5.93283	-5.93283
100	-0.525948	0.348668	-5.93283	-5.93283	-5.93283	-5.93283	-5.93283	-4.34786
116	-1.07246	0.100178	-4.34786	-4.34786	-5.93283	-4.34786	-3.52999	-3.52999
132	-0.684596	0.295852	-2.62623	-3.52999	-4.34786	-2.13348	-3.52999	-2.71465
137	0.515888	0.490789	-5.93283	-4.34786	-4.34786	-5.93283	-5.93283	-4.34786
146	0.435967	0.574231	-3.06504	-1.44103	-1.01741	-3.06504	-2.39882	-1.44103
151	-0.245807	0.548619	6.40093	6.19382	6.63079	6.01774	6.53991	7.40403
153	-0.240221	0.0712908	6.95646	6.87732	7.06401	7.02812	7.21649	7.37343
155	-0.213216	0.301428	-0.231707	-0.596212	-0.656535	-0.560077	-0.161345	-0.11745
161	0.231743	0.405375	1.96995	1.83275	1.27286	1.33407	1.24357	1.81845
175	0.0349337	0.842488	1.04146	1.12304	1.17448	1.39339	1.06432	0.778739
179	0.589661	0.277855	-3.06504	-3.06504	-4.34786	-4.34786	-4.34786	-3.52999
187	0.00396686	0.98001	4.08112	3.93578	3.97903	3.92261	3.76631	4.30085
195	-0.655782	0.0386234	2.54996	2.61692	1.92453	3.29878	2.82758	2.94519
206	0.279733	0.360092	-0.51412	-0.596212	-0.51412	-0.439312	-0.583554	-1.44103
247	-0.524248	0.61214	-5.93283	-5.93283	-3.52999	-4.34786	-5.93283	-3.52999
251	-0.197477	0.0362263	5.276	5.15499	5.08912	5.37195	5.44873	5.29298
257	0.475632	0.0142767	7.237	6.82337	7.07243	6.69479	6.44854	6.56526
264	0.853	0.198205	-2.39882	-1.85475	-1.11686	-2.71465	-1.74594	-3.52999
265	-0.822591	0.398772	-2.39882	-4.34786	-5.93283	-3.06504	-3.52999	-3.52999
266	0.357269	0.0790342	-0.51412	-0.231707	-0.447901	-1.01741	-0.51412	-0.75805
267	-0.404458	0.049075	-0.889298	-0.51412	-0.720788	-0.11745	-0.288586	-0.51412
273	-1.77636e-15	1	-5.93283	-5.93283	-5.93283	-5.93283	-5.93283	-5.93283
275	-0.139347	0.800963	-2.16788	-3.06504	-1.77268	-3.06504	-1.74594	-1.79456
281	0.568784	0.152199	-0.231707	0.901672	0.464064	-0.179953	-0.360852	-0.0603286
282	0.142384	0.806499	-2.77508	-3.06504	-1.33932	-2.39882	-2.16788	-3.06504
283	0.601532	0.348875	-3.52999	-2.03791	-3.52999	-4.34786	-3.52999	-3.06504
284	-0.014214	0.990242	-4.34786	-5.93283	-2.71465	-5.93283	-3.52999	-3.52999
289	0.0394455	0.728911	2.3924	2.25237	2.53388	2.3536	2.2205	2.49004
295	-0.359823	0.478745	-0.700352	-0.189202	1.06432	0.319432	0.576444	0.307988
299	-0.102562	0.472419	1.55242	1.95479	1.96091	1.87138	1.98301	1.90759
302	0.554252	0.601935	-4.34786	-2.71465	-5.93283	-4.34786	-5.93283	-4.34786
303	-0.188417	0.0814207	6.85119	6.87186	7.00073	7.24804	6.98013	7.06136
313	-0.17867	0.244286	5.95834	5.99759	6.29493	6.13472	6.18498	6.46548
323	-0.183883	0.399768	5.87208	6.23049	6.43321	6.08623	6.40493	6.58988
329	-0.0258343	0.857099	6.73434	6.62409	6.24544	6.54427	6.5492	6.58988
331	0.0322253	0.838398	5.25152	5.22657	5.40832	5.54669	5.01375	5.23432
338	-0.16012	0.24575	3.9053	3.86714	4.01108	4.30899	4.07635	3.88028
361	0.116559	0.532338	8.0123	8.10416	7.53396	7.62486	7.809	7.86703
370	0.334844	0.663259	-1.9691	-3.06504	-2.71465	-1.91494	-4.34786	-2.39882
413	-0.0085884	0.906705	3.04734	3.13505	2.99306	3.13738	3.10293	2.96035
419	0.104917	0.640118	1.79756	1.43584	1.27286	1.6001	1.53898	1.06432
430	-0.018913	0.891234	1.5669	1.65157	1.50074	1.84703	1.53898	1.39486
438	0.031353	0.794568	5.04792	4.97247	4.85074	4.9583	4.72542	5.09887
441	-0.135518	0.0330197	5.4625	5.52026	5.39364	5.63721	5.5723	5.57402
451	0.189813	0.517497	5.97481	5.96478	6.45784	5.98109	5.48477	6.36608
455	0.0977801	0.445247	6.38494	6.19897	6.56387	6.38184	6.14265	6.33213
463	-0.11661	0.742033	6.52875	7.24053	7.4771	6.72447	7.38103	7.48583
476	0.136246	0.259382	1.39486	1.48387	1.30822	1.33407	1.37678	1.06432
486	0.190832	0.387239	7.44351	7.58864	7.36648	7.18641	7.67983	6.9581
498	-0.267844	0.149371	3.59192	3.4719	3.71638	4.16121	3.78926	3.63763
501	-0.314734	0.123554	2.21564	1.81753	1.65876	2.37137	2.1918	2.08861
530	0.0480184	0.824591	-0.583554	-0.189202	-0.825673	-0.631852	-0.743902	-0.365862
551	-0.409119	0.0305979	3.0983	3.04061	3.33203	3.33488	3.63763	3.72087
552	0.21581	0.352919	5.25326	5.09887	4.83309	5.16459	4.89884	4.48023
592	-0.00737256	0.934324	8.23859	8.30517	8.51727	8.40445	8.2931	8.38536
601	-0.239979	0.0897915	3.25431	3.08377	3.26527	3.62745	3.26101	3.44182
616	-0.960015	0.0734298	-2.62623	-2.20805	-3.06504	-1.20371	-1.41915	-2.39882
618	-0.190311	0.741388	-1.11686	-1.01741	-2.71465	-1.74594	-1.59485	-0.912408
619	-0.181007	0.452631	1.35532	1.42437	1.65876	1.21372	1.94763	1.79992
625	-0.180829	0.426266	0.722325	0.926842	1.40094	1.06057	1.3994	1.10974
628	0.209744	0.190984	2.40379	2.63229	2.77091	2.54461	2.19857	2.43452
634	-0.209674	0.564185	0.801418	0.457736	0.393576	1.24682	0.963218	0.0869736
636	0.445099	0.235571	-1.59485	-1.59485	-0.825673	-2.13348	-1.91494	-1.31744
648	-0.102858	0.412035	5.52397	5.48563	5.43689	5.78877	5.36848	5.60315
661	0.106289	0.132639	6.29451	6.23292	6.10529	6.12314	6.06582	6.12665
674	1.13663	0.254506	6.51069	5.84843	6.76216	3.34243	6.63619	5.69996
677	-0.0456097	0.479798	8.4062	8.5208	8.40974	8.39494	8.53904	8.53904
678	0.131137	0.221605	6.69479	6.73209	6.98303	6.58799	6.73507	6.69186
679	-0.00942794	0.939266	3.31273	3.46124	3.64938	3.34041	3.61473	3.48824
698	-0.122016	0.101722	4.26097	4.22121	4.2975	4.42839	4.44451	4.27227
715	0.0860405	0.486555	6.70056	6.9094	6.75793	6.57573	6.91666	6.61459
717	0.339963	0.0577015	-1.41915	-1.22376	-1.11686	-1.44103	-1.74594	-1.59485
729	0.144939	0.699503	4.41186	4.95804	5.40312	4.27661	5.19311	4.84585
730	-0.20835	0.0504944	6.40093	6.60112	6.6875	6.79172	6.74576	6.77566
757	0.112529	0.352813	5.9441	6.15519	6.2136	5.84256	5.98841	6.14089
758	0.0874044	0.430347	5.7252	5.62281	5.67521	5.80013	5.46641	5.49877
782	-0.403797	0.276851	-2.77508	-3.06504	-2.16788	-1.91494	-2.16788	-2.71465
807	0.0693453	0.257263	5.06211	4.98325	5.13492	5.04601	4.97169	4.95549
819	-0.0867041	0.233459	5.98451	5.91389	6.03901	5.9644	6.08165	6.15087
823	0.112267	0.235932	6.93765	6.73353	6.75669	6.79007	6.71853	6.58377
830	-0.459484	0.498838	3.829	3.71947	3.75784	5.5824	3.8073	3.31589
844	-0.0150803	0.926004	4.47584	4.14212	3.89934	4.18991	4.20362	4.17651
856	-0.229064	0.59216	-2.16788	-2.43323	-1.11686	-1.31744	-1.91494	-1.79456
861	0.349	0.0358381	1.17951	1.0304	1.0102	0.840973	0.843285	0.491882
867	0.051742	0.836282	6.61784	6.25532	5.96583	6.59602	6.06255	6.03324
883	-0.0723139	0.604703	6.28737	6.03738	5.99476	6.36744	6.18629	5.98662
894	-0.188494	0.364847	5.05275	5.4329	5.54808	5.24397	5.63507	5.71037
909	-0.0513148	0.585575	3.28215	3.55587	3.37575	3.49789	3.3702	3.49789
926	0.0613843	0.811918	1.79756	1.30822	1.06432	1.43016	1.53898	1.0304
928	-0.159156	0.42331	5.40922	5.16274	5.04254	5.70521	5.18899	5.20734
931	0.00317803	0.971313	5.66103	5.86565	5.87778	5.84256	5.85944	5.68964
939	0.031078	0.822872	10.156	9.87621	9.72217	10.0139	9.868	9.78081
941	0.520304	0.354899	-5.93283	-4.34786	-5.93283	-5.93283	-5.93283	-5.93283
945	-0.258793	0.103405	2.85406	2.9796	2.53388	2.95425	3.11025	3.07871
948	-0.0745548	0.43368	5.57206	5.66587	5.7289	5.56777	5.79232	5.82678
964	0.268137	0.753493	-4.34786	-5.93283	-3.52999	-5.93283	-4.34786	-4.34786
967	0.0359506	0.802833	9.23045	9.1405	8.75919	9.02639	9.06221	8.93442
975	0.964593	0.0754731	-1.20371	-0.0116095	-0.387249	-1.59485	-1.91494	-1.01741
980	-0.0310579	0.893626	4.11462	4.36165	4.91147	4.39775	4.47725	4.597
990	0.00260864	0.997147	-4.34786	-5.93283	-5.93283	-5.93283	-4.34786	-5.93283
995	0.100004	0.449389	7.29623	7.49939	7.70443	7.49039	7.42462	7.2841
1003	0.271068	0.027499	7.15803	7.10613	6.90436	6.89012	6.74143	6.72496
1008	0.0422238	0.761793	5.11184	5.25387	5.42412	5.42596	5.04171	5.1965
1010	-0.290743	0.000633767	5.07849	5.12368	5.02903	5.35844	5.35344	5.39162
1047	-1.77636e-15	1	-5.93283	-5.93283	-5.93283	-5.93283	-5.93283	-5.93283
1065	0.0326272	0.687061	5.64537	5.7233	5.5676	5.64866	5.48572	5.70588
1067	0.121086	0.157135	4.67604	4.80161	4.6192	4.51435	4.67831	4.53792
1089	0.200189	0.0782853	5.27168	5.20227	5.42103	5.08473	4.98288	5.22812
1093	-0.0405644	0.656548	4.69271	4.59732	4.8626	4.67492	4.76328	4.83502
1095	-0.177686	0.199012	4.89401	4.85098	4.50955	4.84254	5.00057	4.94578
1097	-0.198717	0.269292	0.823481	0.669059	0.464064	0.958924	1.0102	0.588754
1117	0.189372	0.412113	5.20002	5.20075	4.90647	5.10632	5.14667	4.48581
1121	0.0804934	0.466206	5.37156	5.39804	5.09318	5.24979	5.26275	5.10981
1124	0.0937523	0.407379	5.59785	5.39109	5.691	5.58602	5.35236	5.46389
1126	0.198704	0.563614	8.66968	8.16534	8.05877	8.69726	7.71048	7.89412
1128	0.0538858	0.606201	4.39625	4.49118	4.16956	4.21733	4.34848	4.32873
1140	-0.0489569	0.735968	3.68273	3.70093	3.81065	4.0696	3.63382	3.64197
1154	0.0456509	0.659425	4.41885	4.42804	4.66335	4.54916	4.33121	4.49399
1166	-0.105627	0.39717	6.36608	6.43016	6.17577	6.26125	6.42792	6.59937
1177	0.128736	0.564539	9.56024	9.75802	10.2471	9.52433	9.76467	9.8882
1178	0.0588012	0.82455	9.54259	9.84715	10.3872	9.62191	9.91862	10.0575
1208	0.0526301	0.601999	5.88864	5.73489	5.55586	5.67575	5.72429	5.62384
1216	-1.77636e-15	1	-5.93283	-5.93283	-5.93283	-5.93283	-5.93283	-5.93283
1233	0.0227829	0.878556	2.80624	2.85066	3.04631	3.14532	2.70656	2.787
1234	0.288043	0.10737	3.19164	2.96227	2.72352	2.8174	2.65885	2.54601
1269	0.38741	0.405621	-3.52999	-3.52999	-2.71465	-3.06504	-3.52999	-4.34786
1272	-0.209402	0.488231	-0.169933	0.457736	0.0811087	-0.0116095	0.188128	0.801418
1280	0.373179	0.118539	4.65662	4.37182	4.27064	4.24568	3.69311	4.25474
1304	0.148801	0.185017	5.32631	5.30067	5.52423	5.1621	5.15631	5.38599
1313	-0.181545	0.564934	4.13236	4.34128	4.71074	4.01556	4.80847	4.88976
1348	-0.0674714	0.162599	8.29937	8.35332	8.38278	8.46628	8.37007	8.40154
1351	-0.0171383	0.901311	8.30821	8.68426	8.65289	8.41389	8.60623	8.675
1357	-0.0942259	0.24999	6.13592	6.17631	6.2136	6.37016	6.13055	6.30915
1378	-0.0623351	0.816477	6.59223	6.28509	6.01363	6.09017	6.80906	6.17702
1385	-0.0231841	0.857867	5.66363	5.49231	5.4456	5.79067	5.42596	5.46068
1391	0.0492835	0.887676	1.33666	1.84586	2.32419	1.43016	2.19857	1.69297
1393	0.112016	0.476022	5.66363	5.61531	5.36346	5.22216	5.66829	5.41322
1403	0.496783	0.328803	6.67977	6.09293	5.36171	5.71523	6.02736	4.90621
1421	0.0749275	0.255044	5.7213	5.76454	5.64708	5.69041	5.67497	5.54268
1426	-0.0536807	0.662796	5.66643	5.43503	5.31736	5.65348	5.40509	5.52797
1449	0.103388	0.379985	6.37722	6.39189	6.71758	6.35495	6.36409	6.4564
1455	0.0702559	0.294465	6.34301	6.49497	6.33398	6.27517	6.30649	6.37874
1457	-0.00883156	0.920818	6.34088	6.37226	6.43249	6.29365	6.31637	6.56174
1459	0.0501182	0.496732	6.83322	6.93	6.99793	6.93632	6.76672	6.90799
1473	-0.0389343	0.820272	8.41456	8.16755	8.01353	8.50898	8.10416	8.10127
1478	0.077831	0.0674302	6.46317	6.52399	6.47227	6.44034	6.39494	6.39064
1483	-0.0035386	0.975918	6.2841	6.33859	6.57864	6.30199	6.34686	6.56174
1510	-0.183331	0.383431	2.82317	3.04683	3.12918	2.92895	3.0643	3.55022
1511	-0.260717	0.0202673	8.48628	8.55678	8.43622	8.64745	8.7174	8.89645
1515	0.137085	0.388252	5.38466	5.05599	5.04778	4.92149	4.90886	5.25284
1523	0.00641534	0.933972	6.30557	6.35156	6.48543	6.48464	6.31879	6.32004
1536	-0.148689	0.0748814	5.2993	5.31021	5.40658	5.37195	5.52797	5.56005
1540	-0.282262	0.581775	2.30849	2.58982	2.30128	3.7098	2.33203	2.0208
1576	-0.08669	0.254839	6.26892	6.25905	6.16215	6.19912	6.34861	6.40205
1582	0.0619969	0.775177	2.28147	2.69083	2.83309	2.25237	2.57683	2.77454
1589	-0.0338319	0.763715	7.12031	7.19955	6.90904	7.25483	7.08005	6.99615
1597	0.00801406	0.961562	3.1497	3.49267	3.27894	3.05503	3.29202	3.54315
1604	-0.154162	0.0836426	5.54593	5.75156	5.73917	5.77184	5.84331	5.88075
1608	0.101621	0.232837	4.45578	4.39224	4.4392	4.47725	4.27124	4.2369
1614	0.0342454	0.556883	5.57016	5.43503	5.49616	5.50606	5.39662	5.49877
1670	-0.192839	0.0113634	2.65635	2.58982	2.64881	2.88916	2.79957	2.787
1677	-0.167487	0.523064	2.07741	2.19444	2.70416	2.14112	2.53646	2.787
1684	-1.77636e-15	1	-5.93283	-5.93283	-5.93283	-5.93283	-5.93283	-5.93283
1689	-0.0254251	0.658591	7.39276	7.44311	7.54662	7.4412	7.47624	7.54095
1696	0.0263732	0.876178	6.93688	7.05135	7.14177	6.68281	7.19422	7.17158
1704	-0.0532267	0.404141	5.03493	4.94147	4.89348	5.0561	4.93322	5.04361
1721	-0.10926	0.491929	7.73871	7.95801	8.22998	8.21687	7.95004	8.0871
1737	0.0379555	0.523075	4.42328	4.51061	4.58037	4.45527	4.42895	4.51472
1759	1.065	0.100722	-4.34786	-5.93283	-4.34786	-5.93283	-5.93283	-5.93283
1760	0.510249	0.0207803	8.07964	7.72297	7.57793	7.17927	7.42896	7.24228
1765	0.00239922	0.97868	6.25828	6.18042	5.9758	6.07598	6.18992	6.14215
1779	-0.0209344	0.808003	4.70823	4.82867	4.84585	4.80161	4.6953	4.94837
1808	0.248162	0.444313	-1.59485	-1.11686	-2.16788	-1.91494	-1.74594	-1.9691
1820	-0.359888	0.682555	-3.06504	-3.52999	-5.93283	-3.52999	-3.52999	-4.34786
1823	-0.0778732	0.661928	2.61329	2.77688	2.60283	2.39166	2.88596	2.93955
1857	0.923704	0.372064	-5.93283	-4.34786	-3.06504	-5.93283	-4.34786	-5.93283
1862	0.218182	0.615046	6.36371	5.36095	5.02236	5.25397	5.7437	5.10461
1864	0.128894	0.569797	3.63288	3.41543	3.82681	3.90454	3.28616	3.30634
1889	-0.256758	0.218658	-0.347826	-0.75805	-0.825673	-0.179953	-0.583554	-0.365862
1900	0.272857	0.188644	5.09887	5.18308	4.87417	4.45527	5.06142	4.81429
1928	0.0672188	0.669613	5.14992	5.10407	4.99118	5.3269	4.89632	4.82605
1938	-0.0655764	0.648887	4.77185	4.60084	4.29457	4.65388	4.68166	4.53288
1945	-0.371936	0.20824	6.97457	6.84772	7.06136	7.88077	6.98195	7.13912
1946	-0.136117	0.483617	4.22374	4.0187	4.08362	4.6236	4.06937	4.05091
1948	0.132266	0.655771	2.41686	2.18666	1.79992	2.47956	1.93046	1.61566
1979	0.279917	0.0213561	5.89007	6.07098	6.07627	5.73894	5.61701	5.84107
1995	-0.246181	0.0600935	5.87778	5.7992	5.79823	6.25773	5.89301	6.0673
1996	0.27063	0.0217639	7.43401	7.15057	7.26576	7.05426	7.02391	6.96115
2013	0.137344	0.475366	2.039	2.3597	2.30128	1.84703	2.01663	2.41541
2021	0.107907	0.265965	7.33531	7.20923	7.321	7.32989	7.16947	7.04312
2034	0.808276	0.00875426	0.287737	0.287737	-0.215513	-0.798163	-0.743902	-0.51412
2048	0.0242445	0.823265	6.57921	6.42648	6.51659	6.64896	6.29751	6.50617
2061	0.111985	0.123685	7.10464	7.02703	6.98053	7.02102	6.90313	6.8529
2068	0.0369417	0.744078	5.58569	5.70962	5.84953	5.7298	5.50946	5.79499
2073	-0.169511	0.0587372	7.14786	7.01153	7.07773	7.32804	7.13018	7.28843
2074	-0.108077	0.267263	7.1763	7.08644	6.9874	7.33798	7.14379	7.09362
2082	-0.0800692	0.707413	4.40924	4.23932	4.3643	4.85198	4.2369	4.17307
2083	-0.151833	0.573296	1.99507	1.88031	1.92453	2.63093	1.90759	1.7318
2084	0.520304	0.354899	-5.93283	-4.34786	-5.93283	-5.93283	-5.93283	-5.93283
2093	-0.196359	0.252081	5.73791	5.59424	5.75886	6.20782	5.77206	5.70485
2111	-0.0824522	0.0868561	7.42429	7.4937	7.50564	7.54596	7.59939	7.52522
2112	0.0989326	0.285409	5.21356	5.17313	5.06864	4.94172	5.1965	5.01849
2129	0.0842949	0.637892	4.48427	4.68854	4.79949	4.24859	4.71775	4.74361
2130	0.216327	0.0594854	5.87651	5.99827	5.89539	5.85048	5.54927	5.72368
2133	-0.212694	0.0651702	5.85644	5.9673	5.75536	5.95121	6.0579	6.20727
2161	0.00868304	0.969144	5.18555	5.50622	5.67087	5.06652	5.65015	5.60862
2179	0.0897282	0.441384	6.0175	5.66728	5.74215	5.76689	5.63507	5.76146
2183	-0.0716282	0.631148	8.19811	8.1265	8.07345	8.49608	8.11607	8.00191
2187	-0.139301	0.601003	4.64477	4.99712	5.20837	4.64523	5.35236	5.25605
2188	0.0860371	0.645076	3.29835	3.37575	3.479	2.92895	3.41465	3.54315
2189	0.0948054	0.41513	5.75055	5.83651	6.05226	5.72579	5.70046	5.92712
2190	0.0228096	0.823197	7.44351	7.51748	7.7574	7.51823	7.49552	7.63572
2201	-0.231528	0.0833879	9.62867	9.50207	9.24372	9.63801	9.70691	9.72481
2202	0.438031	0.111152	3.80509	3.73728	3.1907	3.44908	3.00311	2.97859
2203	-0.185217	0.31077	7.83248	7.80553	7.73148	8.31717	7.89087	7.71817
2213	-0.0512952	0.90869	-2.16788	-1.22376	-1.22376	-1.74594	-1.91494	-0.825673
2233	-0.123933	0.134547	4.27145	4.3074	4.32184	4.31381	4.40811	4.54916
2236	-0.165935	0.306928	4.29949	4.14938	3.82681	4.38456	4.27367	4.12122
2244	0.158063	0.05657	6.9004	6.70722	6.829	6.71914	6.63444	6.61002
2245	0.125918	0.346276	3.34041	3.15062	3.16119	3.02995	2.93491	3.31589
2250	0.0020609	0.975126	6.83939	6.86035	6.91011	6.98392	6.84316	6.77685
2255	1.67906	0.00125812	8.49608	8.52702	8.5287	6.27004	7.03952	7.2021
2263	-0.0212447	0.851631	6.2776	6.13327	6.21863	6.42218	6.04474	6.23029
2275	-0.0369397	0.612962	5.93476	5.8904	5.84517	6.05653	5.83874	5.88864
2286	0.0560129	0.494423	7.02187	7.21088	7.17305	6.97917	7.1706	7.08673
2292	0.0164665	0.830572	8.36653	8.45554	8.45554	8.45871	8.26982	8.49994
2300	0.795617	0.284776	-3.52999	-3.52999	-4.34786	-4.34786	-3.52999	-5.93283
2327	0.0837953	0.184252	6.65924	6.66521	6.60717	6.66182	6.50457	6.51482
2330	-0.0123435	0.963797	4.85046	4.85809	5.08449	5.48934	4.76642	4.57989
2332	0.146542	0.166009	6.34638	6.41548	6.33878	6.35935	6.04227	6.26165
2335	0.0749948	0.40798	6.48232	6.34054	6.24923	6.39008	6.25828	6.20108
2340	-0.0709409	0.561033	5.39523	5.34089	5.10245	5.52035	5.278	5.2577
2342	-0.157872	0.147716	4.26097	4.09641	4.18811	4.29729	4.22207	4.50363
2346	0.206877	0.0386562	5.91058	5.80781	5.70418	5.66877	5.62796	5.50727
2348	0.382871	0.360316	7.59884	7.85623	8.73895	7.19998	7.88375	7.95801
2378	0.0704405	0.481017	8.07345	8.03196	8.11016	8.1904	7.86867	7.94596
2396	-0.142058	0.151336	5.40135	5.16415	5.16274	5.46068	5.33215	5.36646
2398	-0.0121241	0.879087	7.90952	7.77555	7.67549	7.77657	7.74036	7.88077
2414	-0.250374	0.0227584	3.75906	3.81517	3.69311	4.14212	3.91028	3.96898
2418	-0.138569	0.576359	2.00486	2.5277	2.70874	2.41541	2.39784	2.83076
2423	0.211147	0.325641	8.84996	8.88885	8.72713	8.21179	8.70233	8.91749
2436	-0.00906269	0.976584	2.73139	3.18466	2.85519	2.38135	3.40065	2.99357
2439	0.0596575	0.653773	6.73625	6.44711	6.3697	6.59602	6.45525	6.32574
2456	0.0502016	0.642016	6.06427	5.93691	5.70336	5.88687	5.86633	5.80357
2473	-0.0942945	0.535706	6.06086	6.44267	6.45101	6.24665	6.44622	6.54017
2479	-0.0804323	0.705306	5.2205	4.90938	4.74688	5.38429	4.91136	4.83309
2481	0.0906943	0.184684	7.19529	7.34094	7.20905	7.23121	7.13389	7.10804
2489	-0.487374	0.0240566	0.75081	0.514175	0.464064	0.979186	0.901672	1.324
2490	-0.0314121	0.612782	6.30557	6.18365	6.16625	6.29955	6.17502	6.27744
2491	-0.00311233	0.988577	5.06558	5.55671	5.55988	5.08473	5.60492	5.48934
2493	0.521137	0.00532038	4.53202	4.57132	4.38081	3.76251	4.07875	4.07635
2494	0.274761	0.0555926	10.1071	10.1321	10.1506	9.61684	9.99758	9.95012
2500	-1.77636e-15	1	-5.93283	-5.93283	-5.93283	-5.93283	-5.93283	-5.93283
2504	1.065	0.100722	-4.34786	-5.93283	-4.34786	-5.93283	-5.93283	-5.93283
2507	0.550043	0.452425	-3.52999	-4.34786	-4.34786	-4.34786	-5.93283	-3.52999
2508	0.0808946	0.932992	-4.10221	-5.93283	-3.52999	-5.93283	-4.34786	-3.52999
2518	-0.0693017	0.882039	5.34149	6.223	6.03324	5.12234	6.49445	6.1662
2530	-0.0368827	0.44793	5.02468	5.00915	5.07322	5.13263	5.01375	5.07251
2538	-0.0406269	0.900104	2.77571	2.76179	3.10943	3.55622	2.73078	2.49004
2540	-0.0487588	0.437196	4.45079	4.41147	4.47223	4.54812	4.3894	4.54575
2549	-1.06626	0.0985078	-5.93283	-5.93283	-5.93283	-5.93283	-4.34786	-4.34786
2550	1.62461	0.0141657	-1.88484	-2.43323	-3.06504	-4.34786	-4.34786	-3.52999
2561	-0.91984	0.334245	-5.93283	-5.93283	-3.06504	-4.34786	-3.52999	-4.34786
2570	-0.501388	0.0171435	0.801418	0.75081	0.429254	1.33407	1.15841	1.00305
2572	0.0398615	0.436799	6.72811	6.7528	6.78702	6.70496	6.79236	6.65023
2580	-0.085214	0.246238	7.0822	7.07016	7.07945	7.27302	7.04252	7.17264
2582	-0.0163411	0.970378	4.43605	4.95804	5.29177	4.12186	5.3704	5.21816
2593	0.0515974	0.742151	3.87623	3.8073	3.46155	3.8449	3.64197	3.50963
2594	-0.0853529	0.595392	5.61239	5.278	5.48018	5.75295	5.29792	5.58429
2595	-0.14406	0.203678	5.83377	5.89991	5.93665	5.99346	6.2241	5.88142
2598	-0.096456	0.785456	5.78604	6.3731	6.48311	5.70187	6.64626	6.57061
2610	-0.306353	0.15103	4.84254	4.99268	5.0644	5.64613	5.0966	5.07849
2614	0.105943	0.600596	2.53646	2.83523	2.6576	2.19349	2.68117	2.82439
2620	-0.127264	0.252832	5.14609	5.23189	5.47386	5.46277	5.33623	5.43328
2641	-0.433196	0.0451803	-2.16788	-2.03791	-2.39882	-1.74594	-1.59485	-1.9691
2644	-0.161578	0.676044	-0.0603286	-0.912408	0.0811087	-0.631852	0.229208	-0.0116095
2675	-0.168837	0.0875476	2.56755	2.65885	2.53388	2.89451	2.70656	2.66759
2676	0.0963928	0.703556	6.32959	6.57135	7.05135	6.31162	6.49902	6.84892
2685	0.0521326	0.746362	3.31666	3.38779	3.62114	3.40655	3.14365	3.62053
2691	-0.194155	0.52708	3.66508	4.20697	4.59476	4.05004	4.36242	4.62145
2712	0.0383203	0.672377	4.51215	4.42328	4.46868	4.26014	4.48458	4.54322
2723	-0.0885074	0.691447	6.19897	6.65588	6.92253	6.53821	6.63805	6.86238
2730	0.0743839	0.748047	5.95079	6.27457	6.01473	5.60407	6.37035	6.03324
2738	-0.130739	0.590048	9.79432	10.0234	10.5787	10.4338	10.1071	10.2471
2739	0.0652808	0.754331	-0.75805	-0.347826	-0.825673	-0.798163	-0.439312	-0.912408
2757	-0.214569	0.265804	7.20887	7.29371	7.75654	7.50303	7.61596	7.78271
2765	0.037553	0.778903	4.47279	4.23606	4.49887	4.14699	4.49399	4.45209
2776	-0.0578211	0.791666	2.41686	2.37968	2.11427	2.49143	2.63463	1.95681
2786	-0.249742	0.0394075	4.60244	4.42518	4.50782	4.68326	4.6831	4.92136
2794	0.364042	0.5504	-1.31744	-1.59485	-1.61891	-3.06504	-1.74594	-0.825673
2796	-0.415286	0.0269593	0.901672	0.768814	0.997054	1.45006	1.3994	1.06432
2801	-0.0960347	0.679924	6.68333	6.27314	5.97281	6.66283	6.28999	6.27146
2820	0.74671	0.0170951	1.79756	1.75603	1.62037	1.08289	1.324	0.519767
2824	-0.0662272	0.465174	6.37642	6.39325	6.30237	6.30768	6.37491	6.58823
2834	-0.144832	0.225499	5.43183	5.25184	5.52502	5.61607	5.39135	5.63936
2853	0.229056	0.0177557	7.34125	7.35064	7.51562	7.10464	7.18259	7.23266
2876	-0.043943	0.834737	4.97194	5.32898	5.44753	4.955	5.44064	5.47386
2885	-0.107789	0.4619	5.86159	5.88208	5.97705	6.29986	5.83874	5.90861
2889	-0.0863192	0.659377	3.59506	3.24361	2.98359	3.18466	3.3909	3.5124
2921	-0.163715	0.361066	3.84128	3.71581	3.61989	4.22352	3.73728	3.71638
2935	0.0516267	0.616675	6.37398	6.2523	6.43583	6.48169	6.21038	6.21737
2976	0.120436	0.146532	5.0076	5.09965	5.11136	4.83309	5.05286	4.96729
2987	0.106009	0.541303	6.33569	6.23292	6.02463	6.39553	5.9863	5.89844
2998	-0.00605673	0.918295	5.84897	5.85439	5.78265	5.93647	5.78877	5.78054
3010	0.117417	0.223216	8.03196	8.16217	8.00331	7.79768	8.03765	8.00909
3012	-0.0716479	0.733964	7.73546	7.27682	7.05644	7.52945	7.5095	7.24649
3020	-1.77636e-15	1	-5.93283	-5.93283	-5.93283	-5.93283	-5.93283	-5.93283
3024	-0.0577429	0.707627	2.97649	3.20866	3.35355	3.4411	3.05353	3.21702
3029	0.0903361	0.704817	5.73466	5.89235	6.30237	5.63112	5.78379	6.23907
3030	-0.0456169	0.815232	6.84528	6.78216	7.05644	6.5724	7.06338	7.18298
3052	-0.062301	0.755368	3.25431	3.3795	3.85525	3.66719	3.36515	3.64197
3056	-0.128656	0.553792	5.48721	5.79485	5.82746	5.47104	5.87208	6.14515
3057	0.103643	0.68942	7.28712	7.21576	7.23539	6.69624	7.62943	7.09893
3062	0.744378	0.00141812	-1.20371	-1.33932	-1.22376	-1.91494	-1.91494	-2.16788
3063	-0.0221021	0.770307	8.1423	8.15269	8.32781	8.31863	8.19811	8.17232
3067	0.0748644	0.614538	6.17631	6.02042	6.13702	6.31085	5.81198	5.99177
3082	0.0223454	0.879359	4.10149	4.17498	4.03783	3.78476	4.2319	4.225
3087	-0.0892388	0.136219	6.91549	7.01372	6.96459	6.97527	7.08098	7.10464
3099	0.234987	0.144575	2.11427	2.51348	2.51741	2.08676	2.10802	2.23555
3103	0.356229	0.200693	0.703512	0.552479	0.464064	0.417946	-0.288586	0.552479
3111	0.0338927	0.538578	4.94172	4.98864	4.93012	4.89725	4.85603	5.00603
3113	0.309424	0.088591	6.97917	6.99552	7.22503	6.49188	6.96831	6.80853
3114	0.015312	0.859698	7.77448	7.71817	7.72095	7.89412	7.63352	7.6408
3148	1.02467	0.184047	-1.9691	-2.03791	-1.9691	-3.06504	-4.34786	-1.59485
3169	-0.110901	0.369591	6.27507	6.12484	6.10927	6.49598	6.21737	6.1319
3176	-0.572477	0.0325571	1.16195	1.08683	1.0102	1.98892	1.69297	1.30189
3181	0.379294	0.070066	5.1636	5.15872	5.5026	4.79878	4.71451	5.17378
3182	0.0086686	0.950216	6.05286	5.93691	5.67521	6.06231	5.80591	5.77577
3189	0.0234117	0.974284	-4.34786	-5.93283	-5.93283	-4.34786	-5.93283	-5.93283
3196	-0.376117	0.118907	2.41686	2.41541	2.92158	3.24361	2.82091	2.81857
3216	-0.401588	0.156984	5.90152	5.86968	5.35559	6.50837	5.87208	5.9597
3223	-0.0993016	0.747529	1.81937	1.94057	2.33976	2.60418	2.16246	1.62846
3225	0.0794311	0.310648	5.63768	5.69164	5.46214	5.48934	5.50614	5.5583
3256	0.172901	0.388375	8.91749	8.68189	8.48883	8.79286	8.53699	8.24118
3273	-0.361115	0.0686651	-0.459353	-0.75805	-0.215513	-0.0116095	-0.161345	-0.169933
3282	-0.717013	0.065575	-1.01741	-0.288586	-0.720788	0.489086	-0.0116095	-0.365862
3285	0.284815	0.743824	-2.39882	-2.43323	-4.34786	-3.52999	-2.16788	-4.34786
3290	-1.77636e-15	1	-5.93283	-5.93283	-5.93283	-5.93283	-5.93283	-5.93283
3298	0.254684	0.340307	5.96226	5.72212	5.52232	5.91	5.45138	5.08912
3304	0.763084	0.478687	-2.62623	-3.52999	-4.34786	-2.39882	-5.93283	-4.34786
3313	0.517206	0.0947334	3.76718	3.87212	3.26017	3.48894	3.07955	2.787
3327	0.217369	0.160449	9.4277	9.35244	9.19294	9.20075	9.26417	8.85618
3329	-0.085188	0.688034	5.60599	5.85931	5.81226	5.43236	6.09818	5.99346
3339	-0.271607	0.368515	2.26053	1.84586	1.23403	1.94554	2.05141	2.17621
3372	1.59879	0.151801	-4.34786	-2.71465	-5.93283	-5.93283	-5.93283	-5.93283
3374	-0.215861	0.645239	0.399741	-0.51412	0.95038	0.0811087	0.931214	0.457736
3375	0.0165701	0.981825	-4.34786	-5.93283	-5.93283	-5.93283	-5.93283	-4.34786
3382	-0.00821609	0.980245	2.99255	2.583	2.11427	2.96035	2.63463	2.13737
3404	-0.273541	0.325914	0.480565	0.0869736	0.464064	0.457736	0.319432	1.09178
3405	-0.128028	0.185147	4.10939	4.01108	3.9961	4.32046	4.12716	4.057
3408	-0.185437	0.00213092	8.34071	8.36838	8.31077	8.55832	8.50898	8.50898
3420	-0.0976046	0.560751	8.41995	8.07345	7.86982	8.33747	8.12848	8.19206
3425	0.000547746	0.997464	4.80275	4.433	4.67462	4.90886	4.41924	4.59101
3428	-0.0315788	0.815126	5.71291	5.75989	5.44669	5.47104	5.76039	5.7814
3454	0.22291	0.808613	-5.93283	-4.34786	-4.34786	-5.93283	-3.52999	-5.93283
3460	1.36106	0.12049	-3.06504	-3.52999	-2.71465	-4.34786	-5.93283	-3.06504
3464	-0.312248	0.503343	-3.52999	-2.71465	-3.06504	-2.71465	-2.16788	-3.52999
3478	0.07308	0.209352	5.82047	5.76045	5.85787	5.8073	5.67094	5.74295
3495	-0.0926843	0.42751	5.05586	5.11161	5.05703	5.38219	4.99268	5.13151
3509	0.101865	0.359405	6.58811	6.57804	6.26212	6.34127	6.38706	6.39517
3520	-0.13749	0.167316	3.18508	3.2718	3.00877	3.34041	3.32692	3.21113
3526	0.0385968	0.753673	6.12462	5.90715	5.86118	6.11974	5.81254	5.85048
3553	-0.21378	0.310929	3.69583	4.09015	4.18551	3.9145	4.377	4.30779
3559	1.23179	0.14157	-2.77508	-3.06504	-3.52999	-3.52999	-5.93283	-3.52999
3561	-0.0654261	0.894961	5.79604	6.37717	6.9659	5.76568	6.41086	7.1492
3562	-0.282603	0.261889	3.73665	4.23932	4.28436	4.01985	4.53564	4.53742
3574	0.297245	0.0237885	4.48846	4.41147	4.17603	4.05004	4.0941	4.04253
3575	0.0992667	0.831048	0.519767	0.669059	1.75603	1.46445	0.627626	0.552479
3580	-0.0227163	0.780936	5.34693	5.53743	5.38429	5.458	5.34321	5.53536
3593	-0.294634	0.0145981	7.58629	7.64437	7.84962	7.96512	7.95217	8.04648
3598	-1.60838	0.147422	-5.93283	-5.93283	-5.93283	-5.93283	-4.34786	-2.71465
3604	0.0260917	0.930175	-0.205894	0.552479	0.319432	-0.179953	0.547014	0.173768
3629	-0.35091	0.214152	5.91019	5.90152	6.20204	6.86217	6.10244	6.10529
3633	-0.721864	0.24312	-4.10221	-2.71465	-4.34786	-2.39882	-3.52999	-3.06504
3635	0.360927	0.155974	4.07397	4.02714	3.43535	3.35273	3.39543	3.71162
3636	0.767406	0.00958555	3.01378	3.35355	2.95034	2.01663	2.56996	2.41541
3641	-0.45718	0.139132	1.16195	0.457736	0.20088	0.979186	1.12977	1.10974
3663	-0.139891	0.231807	7.59168	7.54813	7.55216	7.92284	7.61829	7.57133
3666	0.0763293	0.461989	8.92349	9.25617	9.18789	9.01007	9.05765	9.06968
3671	0.0309715	0.589358	10.3041	10.2975	10.1906	10.2877	10.2557	10.156
3680	0.7411	0.0992457	-2.62623	-3.06504	-3.06504	-3.52999	-4.34786	-3.06504
3687	0.0193605	0.785085	7.28917	7.34427	7.48583	7.27949	7.37638	7.40472
3690	-0.0743831	0.543427	7.40092	7.49247	7.41965	7.28235	7.69253	7.56012
3692	0.159866	0.265747	5.06899	5.08669	5.30106	4.77667	5.01375	5.18297
3693	-0.0433349	0.761905	4.69175	4.49746	4.2369	4.42328	4.64119	4.49399
3706	-0.0506361	0.643136	3.59793	3.62808	3.5817	3.4944	3.85799	3.60169
3712	-0.0175093	0.866588	1.54172	1.7249	1.77001	1.6001	1.83275	1.64497
3731	-0.178639	0.170408	5.86633	5.85243	5.99476	6.12121	6.25296	5.87287
3746	-0.293558	0.0448436	7.87429	8.02335	8.13224	8.19811	8.22305	8.48883
3747	-0.0201187	0.857756	5.06652	5.29947	5.33394	5.10427	5.36848	5.28102
3762	-0.111265	0.361367	6.46525	6.63901	6.75525	6.61447	6.68004	6.89719
3766	-0.22243	0.488151	-2.39882	-2.71465	-2.16788	-1.74594	-2.67448	-2.16788
3775	0.074434	0.469431	7.33379	7.12065	7.03268	7.13166	6.99028	7.14333
3781	-0.0162129	0.977215	2.42572	2.30381	2.12518	3.4944	1.88031	1.56012
3785	-0.0510452	0.700305	5.75989	5.6365	5.45352	5.85787	5.64708	5.50252
3786	-0.149719	0.511029	4.97295	5.28772	5.25152	4.89725	5.48687	5.56712
3787	-0.0455179	0.761584	6.4345	6.45273	6.71449	6.83144	6.47975	6.42792
3790	0.103345	0.0251046	4.36676	4.38153	4.39625	4.3003	4.27927	4.25474
3811	-1.77636e-15	1	-5.93283	-5.93283	-5.93283	-5.93283	-5.93283	-5.93283
3827	-0.545964	0.640357	-5.93283	-2.03791	-2.39882	-3.06504	-3.06504	-2.71465
3841	-0.0914225	0.514077	7.18259	7.09034	6.86732	7.30292	7.17533	6.93727
3847	0.0375987	0.306162	6.54582	6.51734	6.54582	6.53738	6.49902	6.46005
3886	-0.0487854	0.84185	4.8211	4.58533	4.94296	5.29871	4.53974	4.66712
3889	0.0337302	0.812199	5.50129	5.56047	5.27777	5.25521	5.64521	5.33433
3894	0.118727	0.530193	8.19901	8.39935	8.80641	8.22094	8.34634	8.4798
3897	-0.00752426	0.946884	7.09541	6.99933	6.92471	6.90576	6.91197	7.22503
3907	-0.031564	0.836404	6.71403	6.6882	7.05911	6.81217	6.69373	7.05019
3910	-0.0243617	0.770955	5.78733	5.78062	5.86252	5.96947	5.69536	5.84107
3916	0.141049	0.524737	7.15644	7.41116	7.06021	6.77502	7.45653	6.97038
3918	-0.0953779	0.37174	4.94048	4.97917	5.12771	5.01738	5.03118	5.28383
3932	-0.0412465	0.572774	4.79565	4.75778	4.80348	4.69271	4.86937	4.91709
3938	-0.544122	0.464857	-5.93283	-5.93283	-4.34786	-5.93283	-4.34786	-4.34786
3939	-0.00267721	0.998117	-4.34786	-5.93283	-4.34786	-5.93283	-5.93283	-2.71465
3940	-0.0894904	0.35155	6.826	6.91796	6.98442	6.87227	6.97457	7.1492
3945	0.0220696	0.730211	5.74488	5.74789	5.71591	5.83052	5.62828	5.68581
3951	0.246759	0.354802	0.319432	-0.126357	0.319432	0.153346	0.138545	-0.51412
3994	0.0944071	0.381092	5.74488	5.77184	6.03577	5.66697	5.76218	5.83762
4021	-0.0296308	0.81276	5.13719	5.3047	5.39765	5.1621	5.25438	5.50862
4060	-0.00488658	0.970649	4.37737	4.63924	4.56378	4.46213	4.74772	4.377
4079	0.0149892	0.969465	4.44433	4.6163	5.45873	4.63162	4.48458	5.35344
4082	0.0427948	0.8049	3.32652	3.166	3.25431	3.12086	2.96077	3.54315
4098	-0.926617	0.0114463	-2.39882	-1.85475	-1.77268	-0.798163	-1.14244	-1.31744
4136	0.0545513	0.493977	6.25043	6.16188	6.08607	6.21016	6.12631	5.99991
4160	0.0527954	0.65291	8.53323	8.51128	8.78478	8.71253	8.52365	8.43476
4165	0.240217	0.125338	4.2188	4.12252	4.56051	4.06463	3.9842	4.13213
4170	1.34924	0.000766933	-0.940469	-1.11686	-0.912408	-2.13348	-2.16788	-2.71465
4175	-0.0951375	0.782764	5.68822	6.39398	6.35486	5.68138	6.58758	6.44003
4178	-0.0651742	0.508812	5.44353	5.69499	5.60821	5.55347	5.76754	5.61591
4195	0.041255	0.672457	7.25734	7.10804	6.94661	6.99365	7.06136	7.13389
4196	0.18524	0.384909	6.12934	6.12349	6.29124	5.68822	5.903	6.39553
4210	0.00303438	0.996651	-5.93283	-5.93283	-4.34786	-4.34786	-5.93283	-5.93283
4214	-0.235413	0.173401	5.11931	4.95322	4.71074	5.34644	5.18297	4.9655
4221	0.154786	0.364887	2.21564	2.42572	2.60283	2.33976	2.01663	2.42364
4224	-0.458644	0.0876675	5.0325	4.64119	4.2511	5.24979	5.10267	4.95881
4231	-1.77636e-15	1	-5.93283	-5.93283	-5.93283	-5.93283	-5.93283	-5.93283
4233	-0.068506	0.910351	-2.16788	-2.20805	-2.71465	-3.52999	-1.59485	-1.79456
4266	0.751849	0.098924	0.519767	1.00305	-0.0116095	-0.798163	0.0869736	-0.0603286
4273	-0.600607	0.0758246	1.21372	1.86747	0.926842	1.81937	2.17461	1.79992
4285	0.0102107	0.940328	4.15053	4.07026	3.88726	4.25065	3.98	3.85251
4303	0.0149351	0.979745	-3.06504	-4.34786	-4.34786	-4.34786	-4.34786	-3.06504
4306	0.379966	0.736116	-4.34786	-3.52999	-5.93283	-5.93283	-5.93283	-3.06504
4308	-0.0714612	0.439672	6.96831	6.79334	6.7729	7.0485	6.84026	6.86197
4322	-0.0765127	0.473408	6.22274	6.15368	5.91256	6.27004	6.14254	6.10868
4331	0.0305567	0.778362	6.73353	6.8014	7.0234	6.6882	6.91364	6.86301
4343	-0.0192724	0.965033	4.17431	5.01468	4.81752	3.90976	5.16857	4.95881
4354	-0.287324	0.0297094	1.25679	1.48387	1.27286	1.50074	1.69297	1.6737
4360	-0.435925	0.0119483	3.15808	2.9796	2.98359	3.64564	3.49789	3.29034
4377	0.0896553	0.272934	6.64996	6.68307	6.60717	6.68961	6.43727	6.54582
4381	0.941405	0.0093613	-1.11686	-0.825673	-0.720788	-2.13348	-1.41915	-1.9691
4384	-0.180981	0.587832	-1.20371	-1.33932	-1.9691	-1.01741	-1.14244	-1.79456
4385	0.378019	0.107751	0.215265	0.287737	0.393576	-0.351834	0.319432	-0.231707
4404	0.350115	0.261624	-2.77508	-2.43323	-2.71465	-2.71465	-3.52999	-2.71465
4436	-9.22205e-06	0.999955	5.45192	5.43092	5.54808	5.80977	5.30009	5.32561
4437	0.00980713	0.933456	7.2608	7.17264	7.29257	7.44614	7.04761	7.20403
4440	-0.000627875	0.991398	6.33049	6.32291	6.34788	6.44203	6.2628	6.29955
4456	0.467349	0.245408	4.47584	3.95692	3.87426	3.82104	2.96837	4.13976
4478	-0.0553855	0.793229	3.38032	3.61251	4.01108	3.96145	3.58968	3.61603
4501	-1.77636e-15	1	-5.93283	-5.93283	-5.93283	-5.93283	-5.93283	-5.93283
4510	0.0548282	0.944514	-2.39882	-2.71465	-3.06504	-1.74594	-4.34786	-2.16788
4515	0.0149891	0.919721	7.53865	7.27565	7.42746	7.58864	7.13838	7.47166
4523	-0.53366	0.124286	-3.06504	-2.71465	-2.71465	-2.71465	-2.39882	-1.79456
4534	-0.0150736	0.863559	7.52196	7.51562	7.37574	7.60463	7.50645	7.34782
4541	0.079022	0.500325	4.88182	4.98864	5.22493	5.02017	4.8389	4.99835
4544	-0.0122244	0.978449	5.09318	4.40365	4.34324	5.45513	4.13013	4.31888
4555	-0.444753	0.00942755	6.72974	6.86458	6.73434	7.43161	7.15845	7.07303
4557	-0.246705	0.354829	5.64464	5.45014	5.0168	6.00599	5.41919	5.43758
4563	0.385515	0.148902	2.54461	2.3427	2.1616	2.42572	1.75411	1.7318
4595	0.227948	0.115673	4.74317	4.6189	4.92654	4.68326	4.36242	4.56317
4618	0.0328484	0.90749	-0.459353	-0.447901	-0.912408	-0.707426	-1.01741	-0.169933
4638	-0.0445944	0.443353	5.31649	5.16415	5.18045	5.25843	5.24092	5.29802
4639	-0.143898	0.293562	5.11344	4.945	4.96919	5.00254	5.0644	5.39503
4650	-0.148738	0.571042	4.52881	4.71089	4.29457	4.22054	5.05838	4.69115
4655	0.536832	0.0206503	4.58215	4.90355	4.47565	3.88194	4.27124	4.19052
4673	-0.193691	0.074678	6.93999	6.91442	7.10199	7.06836	7.15845	7.31025
4681	-0.192828	0.453293	0.0355018	-0.0668276	-0.447901	-0.0116095	-0.288586	0.422755
4686	-0.114356	0.784144	5.47981	6.29099	6.40769	5.52035	6.5773	6.40602
4703	-0.148058	0.189976	5.91855	5.95888	5.6634	5.90715	6.0784	5.999
4706	-0.0110692	0.92207	6.95423	6.76116	6.69784	6.9905	6.73945	6.71876
4707	0.17011	0.564368	0.287737	-0.0116095	-0.161345	-0.439312	-0.360852	0.422755
4711	-0.0896146	0.610356	4.82729	4.50436	4.20911	4.64119	4.56051	4.61662
4735	0.0230535	0.921456	5.80812	6.09617	6.41599	5.74104	6.20755	6.29451
4755	-0.129116	0.370933	5.44207	5.75879	5.89539	5.92467	5.77622	5.77897
4767	0.440236	0.0580171	7.35953	7.08557	7.654	6.88629	7.13132	6.75964
4775	0.130898	0.243349	5.40713	5.49385	5.54808	5.18969	5.33433	5.52984
4782	-0.108781	0.581409	5.08912	5.46815	5.28762	5.06026	5.638	5.4625
4792	0.0876288	0.631041	3.89061	3.72508	3.56455	3.43535	3.52374	3.96297
4800	-0.146194	0.34457	9.82751	10.1672	10.0458	9.92535	10.2877	10.2642
4801	-0.216785	0.270155	3.9402	4.3894	4.45649	4.27064	4.57408	4.57989
4812	0.170081	0.224316	5.78834	5.78265	6.16825	5.80189	5.68167	5.74473
4819	0.261265	0.478609	1.4273	2.24559	2.38409	1.43016	1.64119	2.17621
4827	-0.0018025	0.958647	4.19353	4.15594	4.18551	4.1821	4.19805	4.16038
4829	0.104181	0.466781	5.32385	5.28772	4.89053	4.99589	5.10417	5.09148
4832	0.0348398	0.918324	0.480565	-0.231707	-0.656535	-0.231707	0.0355018	-0.288586
4898	-0.538216	0.6011	-5.93283	-3.52999	-5.93283	-3.52999	-4.34786	-5.93283
4907	-0.0603206	0.59126	3.96444	3.81517	3.63067	3.9394	3.90062	3.75555
4921	0.218758	0.0767409	5.66363	5.50174	5.55696	5.29871	5.2297	5.54101
4923	-0.197251	0.287849	3.77176	3.9394	3.95333	4.3907	3.80062	4.0696
4924	-0.128056	0.17413	5.76582	5.73428	5.71946	6.03553	5.76754	5.80357
4929	0.00392407	0.980652	5.00675	4.88713	5.04778	5.22989	4.67682	5.03071
4932	0.057488	0.360027	5.29427	5.34089	5.33644	5.21641	5.20796	5.37461
4933	-0.1976	0.14359	3.19164	3.21862	3.34041	3.26757	3.41982	3.65336
4939	-0.450264	0.639644	-5.93283	-4.34786	-4.34786	-5.93283	-4.34786	-3.06504
4940	0.0611999	0.469628	4.97194	4.86343	4.75778	4.86637	4.70105	4.84679
4941	0.0791651	0.327829	5.8509	5.90715	6.0827	5.87287	5.81482	5.91468
4957	0.127844	0.0940777	8.76253	8.81589	8.93077	8.62893	8.74805	8.74805
4959	0.0574876	0.312131	5.72026	5.72579	5.71014	5.7397	5.67336	5.57106
4971	0.121141	0.306583	2.64751	2.9412	2.94469	2.65003	2.81585	2.6946
4975	0.0741538	0.291742	5.71796	5.68885	5.74856	5.74856	5.5356	5.65102
5020	-0.468863	0.0590806	-1.11686	-0.75805	-0.825673	-0.11745	-0.51412	-0.666555
5023	-1.77636e-15	1	-5.93283	-5.93283	-5.93283	-5.93283	-5.93283	-5.93283
5028	-0.290157	0.127967	5.09887	4.82867	4.74688	5.41184	5.20227	4.93713
5034	0.209336	0.0587653	5.94064	6.00779	5.95016	5.74767	5.91414	5.60607
5038	-0.0870473	0.466965	6.63507	6.55575	6.32469	6.49497	6.54185	6.74107
5051	-0.215506	0.244173	1.29236	0.901672	1.46445	1.37374	1.37678	1.56012
5058	-0.0730405	0.616489	2.5243	2.83523	2.68244	2.56755	2.7182	2.96837
5060	0.473225	0.0353142	-0.231707	-0.231707	0.234551	-0.631852	-0.51412	-0.51412
5071	0.0782324	0.362706	5.49858	5.4538	5.28102	5.30828	5.42385	5.26679
5077	-1.77636e-15	1	-5.93283	-5.93283	-5.93283	-5.93283	-5.93283	-5.93283
5082	0.124412	0.753679	-1.9691	-1.59485	-1.22376	-2.39882	-1.59485	-1.20371
5087	-0.153798	0.577467	-2.62623	-2.71465	-2.16788	-2.39882	-2.67448	-1.9691
5113	0.718507	0.18873	3.61989	3.82075	3.11589	1.90979	3.62808	2.83634
5131	-1.77636e-15	1	-5.93283	-5.93283	-5.93283	-5.93283	-5.93283	-5.93283
5140	-0.450132	0.0151859	4.01406	3.91135	3.95594	4.57641	4.16165	4.50094
5145	0.0448285	0.822454	4.61184	4.90595	5.10818	4.54575	4.87504	5.06154
5149	0.0128053	0.920563	2.80624	2.68117	2.49143	2.50087	2.62463	2.81857
5150	0.0966175	0.307606	2.74904	2.95425	2.96787	2.72789	2.76179	2.88706
5187	-0.0941226	0.70413	9.49481	9.38605	9.49755	10.0458	9.43429	9.18218
5213	-0.196759	0.484321	4.62969	4.76642	5.40832	4.80716	5.26982	5.30654
5224	0.261765	0.395802	-2.39882	-2.20805	-3.06504	-2.71465	-2.67448	-3.06504
5227	0.320264	0.00468904	4.12431	3.97046	3.92955	3.64995	3.6912	3.72508
5233	0.00260864	0.997147	-4.34786	-5.93283	-5.93283	-5.93283	-4.34786	-5.93283
5234	-1.77636e-15	1	-5.93283	-5.93283	-5.93283	-5.93283	-5.93283	-5.93283
5237	-0.545957	0.463268	-5.93283	-4.34786	-5.93283	-5.93283	-4.34786	-4.34786
5252	0.0560829	0.392212	5.07193	5.00724	5.18297	5.02615	5.08383	4.98288
5267	-1.77636e-15	1	-5.93283	-5.93283	-5.93283	-5.93283	-5.93283	-5.93283
5273	0.0146902	0.843661	5.53336	5.48372	5.54093	5.64344	5.40685	5.46641
5312	-0.0636092	0.705832	4.97968	5.13854	5.45352	5.32936	5.04792	5.38447
5314	-0.0231889	0.74062	5.73055	5.6822	5.56375	5.63626	5.63674	5.77475
5321	-0.0191379	0.76707	6.70471	6.72343	6.89859	6.79968	6.77902	6.805
5328	0.211828	0.156727	6.80756	6.87008	6.79968	6.88243	6.53522	6.42559
5338	0.580252	0.343597	-1.31744	-2.03791	-1.11686	-1.11686	-3.06504	-1.9691
5343	-0.0654328	0.307136	3.38973	3.24951	3.28951	3.38564	3.42504	3.31589
5344	-0.175276	0.0516115	3.70029	3.87483	3.78132	3.98395	3.87212	4.02549
5372	-0.126765	0.597061	-2.62623	-2.03791	-2.16788	-2.39882	-1.91494	-2.16788
5397	0.0510864	0.464451	6.39757	6.47709	6.30807	6.42339	6.26892	6.3382
5424	-0.00773488	0.98723	2.5038	3.60747	3.99788	3.8073	3.32218	2.98359
5432	0.118172	0.605929	4.82478	4.47223	4.80516	4.88372	4.18551	4.69115
5448	0.125635	0.182794	4.57114	4.69921	4.77315	4.66836	4.46249	4.53564
5456	-0.0170239	0.88046	5.84682	6.01798	6.19572	5.95643	6.00451	6.14764
5458	0.0808498	0.642326	6.8	6.72447	6.53438	6.93094	6.44003	6.44876
5459	-0.111971	0.176393	4.4623	4.2991	4.52521	4.49365	4.58562	4.54322
5468	0.163193	0.0521464	4.35319	4.49991	4.32714	4.22858	4.17369	4.28811
5470	-0.0910547	0.61259	5.21686	5.39542	5.18844	5.02236	5.43794	5.60862
5497	-0.0457816	0.884531	-0.288586	-0.0668276	-0.102478	-0.439312	0.516971	-0.439312
5516	-0.0684289	0.681207	4.37163	4.51819	4.82096	4.42554	4.6896	4.79357
5525	-0.0944055	0.51472	3.52136	3.78103	3.99084	3.95111	3.84803	3.77176
5551	-0.0507476	0.58488	6.49571	6.29024	6.27755	6.42773	6.29409	6.49675
5553	0.550967	0.494597	-3.52999	-3.52999	-4.34786	-3.52999	-5.93283	-3.52999
5561	0.00256367	0.983325	4.36203	4.38153	4.24312	4.10464	4.51061	4.35932
5571	-0.171086	0.633496	6.14348	6.83144	6.78812	6.15883	7.11046	6.99793
5572	0.0436592	0.692883	5.92981	5.9905	6.17892	5.87738	6.15197	5.93456
5573	-0.0217501	0.875201	0.287737	0.363398	0.0355018	0.280867	0.0869736	0.393576
5581	-0.172453	0.190417	4.70939	4.58533	4.35339	4.71922	4.83502	4.61313
5587	-0.0255733	0.865016	6.03368	6.26919	6.10068	5.87918	6.32141	6.27457
5601	0.128744	0.260931	4.9291	4.86692	5.11136	4.99305	4.71965	4.81095
5604	0.115646	0.402015	5.52916	5.4984	5.80977	5.5352	5.31725	5.63936
5619	0.23467	0.581318	3.62308	3.57517	2.83309	2.43452	3.68077	3.20035
5658	-1.77636e-15	1	-5.93283	-5.93283	-5.93283	-5.93283	-5.93283	-5.93283
5664	0.0536309	0.715053	6.93119	7.05293	7.08702	6.72208	7.22256	6.9631
5686	-0.0343385	0.292454	6.01265	6.03913	5.98598	6.04298	6.05465	6.04298
5697	0.875297	0.130358	-2.62623	-2.20805	-3.06504	-3.52999	-2.67448	-4.34786
5702	0.122501	0.434783	0.399741	0.552479	0.778739	0.457736	0.277617	0.625553
5719	-0.306839	0.0177485	1.73511	1.84586	1.89592	2.2784	2.05141	2.06805
5720	0.400172	0.000319903	7.13389	7.18157	7.06204	6.6809	6.76216	6.73353
5721	-0.0433238	0.44276	6.04474	6.14826	6.04245	6.06104	6.18699	6.11563
5722	-0.155622	0.53616	9.78081	10.2557	10.4644	9.99758	10.4709	10.4964
5769	0.0275389	0.860462	7.17223	7.40037	7.0927	7.0108	7.45653	7.11368
5773	0.00768453	0.916843	8.06969	7.96069	7.94062	7.86463	8.06969	8.01353
5796	-0.519655	0.0708339	0.480565	0.75081	1.06432	1.64119	1.10103	1.10974
5798	0.0483077	0.788033	4.31023	4.46322	4.82729	4.2815	4.52731	4.63924
5799	0.005398	0.953414	6.34301	6.49027	6.61835	6.51697	6.38066	6.53725
5800	0.138094	0.020539	6.58206	6.53751	6.54728	6.41234	6.36174	6.47921
5807	-0.11908	0.292271	6.06086	6.17159	6.09392	6.01915	6.32555	6.33598
5813	0.0704396	0.691855	3.21113	3.09922	2.62463	2.94308	2.87549	2.91287
5825	0.129476	0.0137404	4.40924	4.36957	4.36676	4.27661	4.25638	4.225
5829	-0.139709	0.802073	-1.88484	-1.44103	-2.39882	-2.13348	-2.39882	-0.75805
5840	-1.86031	0.00886251	-4.34786	-5.93283	-5.93283	-3.52999	-3.52999	-3.52999
5848	0.326149	0.328735	-1.9691	-2.03791	-2.16788	-2.71465	-1.74594	-2.71465
5850	-0.892493	0.00770504	-4.10221	-4.34786	-4.34786	-3.52999	-3.06504	-3.52999
5855	0.512899	0.0788557	0.854587	0.650502	0.660042	0.489086	-0.288586	0.457736
5860	-1.77636e-15	1	-5.93283	-5.93283	-5.93283	-5.93283	-5.93283	-5.93283
5866	-0.472927	0.685454	-4.10221	-3.52999	-5.93283	-3.06504	-5.93283	-3.06504
5871	0.0986383	0.787156	1.39486	0.975892	1.03357	1.77001	0.783276	0.588754
5876	-0.315839	0.0681596	0.215265	0.650502	0.429254	0.660042	0.87033	0.693261
5881	0.064643	0.744922	-1.41915	-0.912408	-1.22376	-1.01741	-1.41915	-1.31744
5919	-0.727725	0.184699	-1.50634	-0.75805	-0.912408	-0.0668276	0.229208	-1.20371
5927	-1.08946	0.00367326	5.82254	5.45707	5.68529	7.12577	6.43422	6.6803
5930	-0.109698	0.357332	6.41631	6.34127	6.32988	6.67601	6.28243	6.46124
5944	-0.189996	0.356148	5.61078	5.52026	5.3274	5.30038	5.88175	5.84331
5949	1.05494	0.104734	0.215265	0.552479	1.74504	-0.631852	-0.360852	0.307988
5965	-1.77636e-15	1	-5.93283	-5.93283	-5.93283	-5.93283	-5.93283	-5.93283
5975	0.0230378	0.944905	-1.74594	-1.85475	-0.825673	-1.59485	-1.59485	-1.31744
5977	-0.403143	0.326463	4.38382	3.9961	4.27328	5.35587	4.49626	4.02348
5980	-0.71704	0.197252	-2.16788	-2.20805	-2.16788	-0.707426	-1.27889	-2.39882
5991	0.35792	0.194036	6.05511	6.11725	6.80354	5.90464	5.82733	6.16848
5993	-0.00238619	0.985281	4.26749	4.36585	4.55034	4.33599	4.25474	4.59889
6008	-0.0760665	0.623403	4.99118	4.92654	4.82867	5.29167	4.79313	4.89699
6012	0.131257	0.423117	9.79696	9.98272	10.3041	9.85756	9.79432	10.0373
6014	0.600644	0.574435	-3.52999	-2.71465	-3.06504	-2.39882	-5.93283	-2.71465
6016	-1.77636e-15	1	-5.93283	-5.93283	-5.93283	-5.93283	-5.93283	-5.93283
6018	-1.77636e-15	1	-5.93283	-5.93283	-5.93283	-5.93283	-5.93283	-5.93283
6025	-0.0549607	0.611281	2.73139	2.43766	2.41541	2.53646	2.61459	2.60418
6065	-0.209461	0.420443	2.97649	2.57541	2.19444	3.06338	2.62463	2.70706
6066	-0.0303755	0.941828	-3.06504	-2.71465	-3.06504	-2.13348	-3.52999	-3.06504
6076	0.0512915	0.706114	3.70029	3.55587	3.40065	3.61989	3.60016	3.28616
6077	-0.0803571	0.375648	3.25431	3.13505	3.18508	3.26757	3.14365	3.4087
6092	-0.118211	0.909588	-5.93283	-3.06504	-5.93283	-4.34786	-4.34786	-5.93283
6108	-0.076943	0.737603	0.399741	0.393576	0.778739	0.958924	0.576444	0.26914
6109	-0.584991	0.0729737	-2.77508	-3.06504	-2.16788	-1.91494	-2.16788	-2.16788
6117	-0.0153729	0.855172	9.06801	9.03191	9.02639	9.21416	9.03296	8.92581
6125	-0.616773	0.0515686	-0.0116095	-0.0668276	0.393576	0.457736	1.12977	0.552479
6128	-0.316621	0.405137	2.23555	2.64751	3.48543	2.89451	3.07412	3.33081
6144	0.0862639	0.35461	7.43161	7.44649	7.6408	7.53936	7.36749	7.35329
6146	1.01535	0.00242536	3.91818	3.91501	4.13036	3.3485	2.85574	2.7182
6147	0.192705	0.391721	4.79112	4.76896	5.1053	4.99835	4.31888	4.77696
6149	0.0345081	0.782598	5.48934	5.55577	5.8146	5.73362	5.56926	5.45211
6171	-0.361296	0.00271338	4.44433	4.30148	4.33399	4.71922	4.80604	4.63924
6183	-0.101525	0.768427	4.07779	4.74361	4.4933	3.94617	4.97169	4.67924
6184	-0.051513	0.63704	4.3555	4.55165	4.31023	4.29457	4.52405	4.54916
6185	-0.519106	0.353098	-5.93283	-5.93283	-5.93283	-4.34786	-5.93283	-5.93283
6188	-0.738114	0.0175439	0.102245	0.287737	0.880588	1.24682	1.15841	1.06432
6193	-0.00843407	0.972032	7.77555	8.13224	8.37007	7.74438	8.36534	8.1904
6202	-0.20425	0.552739	0.625553	0.514175	0.75081	1.52524	0.576444	0.422755
6208	0.224846	0.380015	4.94798	5.07076	4.62796	4.35027	5.08912	4.52405
6238	-0.065329	0.666066	5.01668	4.62718	4.50955	4.79258	4.74772	4.817
6243	0.351994	0.708639	-4.10221	-5.93283	-4.34786	-5.93283	-5.93283	-3.52999
6246	-0.773094	0.393294	-4.34786	-5.93283	-5.93283	-4.34786	-5.93283	-3.52999
6252	-0.0248526	0.805242	6.05424	6.06759	6.27724	6.12797	6.04956	6.29602
6254	-0.027099	0.868777	4.78049	4.85809	5.03995	4.64904	4.92726	5.17873
6280	0.520304	0.354899	-5.93283	-4.34786	-5.93283	-5.93283	-5.93283	-5.93283
6281	-1.77636e-15	1	-5.93283	-5.93283	-5.93283	-5.93283	-5.93283	-5.93283
6284	-0.519106	0.353098	-5.93283	-5.93283	-5.93283	-4.34786	-5.93283	-5.93283
6286	-0.0725179	0.362509	5.83734	5.86646	5.94757	5.82733	5.98173	6.0579
6296	0.172323	0.827151	-4.10221	-4.34786	-4.34786	-4.34786	-3.06504	-5.93283
6304	-0.0894304	0.673775	6.79334	6.32626	6.45612	6.9546	6.49693	6.39757
6315	0.173172	0.40744	2.57541	2.7011	2.26141	2.22544	2.65885	2.12593
6331	-0.0342122	0.875647	3.72836	3.89354	4.2511	3.64995	4.15338	4.16038
6348	-0.0336821	0.934682	-3.06504	-2.03791	-1.9691	-1.91494	-2.67448	-2.39882
6355	-0.0485742	0.656743	4.96081	5.0454	5.11368	4.88524	5.20492	5.1703
6371	0.0195899	0.896237	4.85184	4.70378	4.96437	5.09639	4.68417	4.68569
6377	-0.149016	0.511446	3.27013	2.96227	2.63906	3.23627	3.26527	2.82439
6379	0.244459	0.370293	0.926842	0.75081	0.901672	0.195415	0.516971	1.1333
6382	-0.0454255	0.895057	-0.231707	-0.679917	-0.447901	-1.01741	0.138545	-0.365862
6398	0.0672156	0.221215	4.95462	4.92937	5.00986	4.87073	4.96919	4.85074
6416	-0.163967	0.277328	7.13838	7.10085	7.06261	7.54883	7.17723	7.06872
6426	0.0260882	0.885137	6.14259	6.09293	6.62259	6.29633	6.10032	6.38342
6430	-0.108611	0.159732	5.16503	5.1899	5.31736	5.40867	5.24687	5.34321
6437	0.0983245	0.489568	5.13276	5.20287	5.51402	5.34463	5.07099	5.13898
6440	-0.225363	0.124322	1.94554	2.12593	2.36133	2.30381	2.46009	2.3344
6463	-0.0892584	0.811864	7.86735	8.4791	8.61364	7.76855	8.67827	8.77674
6464	0.201845	0.71769	-2.39882	-2.20805	-3.52999	-3.52999	-2.16788	-3.06504
6465	-1.75547	0.0320569	-5.93283	-5.93283	-4.34786	-3.52999	-4.34786	-3.06504
6473	0.0609722	0.499666	5.45864	5.24481	5.20075	5.1965	5.21447	5.31379
6478	-0.57024	0.0810202	-2.77508	-2.03791	-1.9691	-1.91494	-1.59485	-1.59485
6488	-0.21538	0.0147376	9.43032	9.47413	9.35818	9.53773	9.67496	9.6958
6492	-0.128753	0.727491	2.87973	3.25675	3.67641	3.99482	3.25675	2.94519
6509	-0.423872	0.701088	-5.93283	-4.34786	-3.52999	-3.06504	-5.93283	-3.52999
6513	-1.77636e-15	1	-5.93283	-5.93283	-5.93283	-5.93283	-5.93283	-5.93283
6519	-0.0853133	0.365651	4.83612	4.57524	4.57776	4.79038	4.71031	4.74969
6521	0.178271	0.4154	5.30828	4.97917	4.84585	5.21784	4.69848	4.69373
6526	-0.0790324	0.588974	1.94554	1.84586	2.10327	2.13403	1.79992	2.2054
6531	0.112226	0.388881	5.86913	5.82913	6.17892	5.88581	5.7185	5.93678
6545	-0.356955	0.547807	2.92783	3.32218	4.44831	4.69831	3.78476	3.27894
6556	-0.0978929	0.535372	9.61858	9.868	9.79134	9.5704	9.97611	10.0234
6563	1.14925	0.102655	-4.10221	-5.93283	-4.34786	-5.93283	-5.93283	-5.93283
6577	-0.537614	0.10915	0.138545	-0.126357	0.801418	0.788085	0.576444	1.06432
6580	0.297008	0.448126	-1.31744	-0.126357	-0.387249	-1.01741	-0.743902	-1.01741
6584	0.0239712	0.801533	4.87256	4.7315	4.75228	4.76867	4.61344	4.90699
6617	-0.11015	0.31674	3.1423	3.26527	3.49022	3.44908	3.38485	3.3909
6629	0.0985146	0.776379	2.61823	2.44604	2.06805	1.62307	2.67378	2.52964
6645	-1.77636e-15	1	-5.93283	-5.93283	-5.93283	-5.93283	-5.93283	-5.93283
6647	-0.114097	0.405929	4.44433	4.40365	4.61372	4.62588	4.38456	4.79654
6672	0.184322	0.285157	6.65827	6.39494	6.356	6.2092	6.09246	6.55832
6675	-0.754183	0.103843	-3.06504	-2.03791	-3.06504	-1.91494	-2.39882	-1.59485
6684	0.113676	0.365285	3.76251	3.67402	3.68818	3.35273	3.71162	3.71638
6691	-0.28167	0.401028	0.0355018	-0.0668276	0.234551	-0.288586	0.755434	0.552479
6692	-0.0172881	0.980967	-5.93283	-4.34786	-4.34786	-4.34786	-4.34786	-5.93283
6701	0.542518	0.340673	-4.34786	-5.93283	-5.93283	-5.93283	-5.93283	-5.93283
6702	0.259801	0.128853	5.56432	5.36228	5.15631	5.3047	5.02468	4.98116
6703	-0.155156	0.367111	3.24861	2.99399	2.70874	3.25109	3.15672	3.01772
6705	-0.300711	0.415813	1.11922	0.332611	1.41285	0.906125	1.26803	1.59754
6707	-0.0996993	0.714196	4.18336	3.84099	3.63067	4.44101	3.65801	3.87319
6732	-0.02708	0.831665	6.71687	6.5678	6.44179	6.80662	6.45612	6.54825
6736	-0.174902	0.273793	0.880588	0.872599	1.10491	1.33407	1.15841	0.889521
6750	-0.0640308	0.515405	8.61364	8.50898	8.81589	8.72713	8.76828	8.63492
6755	-0.073143	0.143395	9.09786	9.18789	9.20075	9.24866	9.19294	9.26417
6778	0.671176	0.0788671	-2.16788	-2.43323	-2.39882	-2.39882	-3.06504	-3.52999
6792	-2.40283	1.44201e-05	-5.93283	-5.93283	-5.93283	-3.52999	-3.52999	-3.52999
6808	0.514709	0.0617897	5.39662	5.07872	5.15827	5.12572	4.58886	4.38456
6820	-0.0156067	0.660617	6.20535	6.25069	6.23236	6.26538	6.26594	6.20343
6821	0.0811943	0.534449	3.24361	3.46464	3.44803	3.37575	3.09002	3.44772
6822	0.309196	0.0648811	2.85406	2.6946	2.47822	2.40215	2.49478	2.2054
6833	0.289593	0.0906241	3.479	3.17725	3.3636	2.82494	3.08377	3.24361
6837	1.01486	0.148408	-3.52999	-2.43323	-2.39882	-2.71465	-4.34786	-4.34786
6845	0.776385	0.172648	-1.31744	-2.03791	-2.16788	-2.39882	-1.91494	-3.52999
6858	-0.281978	0.312319	-0.75805	-0.447901	-0.347826	-0.707426	-0.11745	0.0869736
6859	0.143063	0.326093	11.295	11.3649	11.7521	11.3223	11.295	11.3649
6861	0.542518	0.340673	-4.34786	-5.93283	-5.93283	-5.93283	-5.93283	-5.93283
6868	-0.165033	0.333967	2.68117	2.37968	2.4969	2.90799	2.42572	2.73384
6870	-0.126332	0.148261	6.2523	6.0827	6.25704	6.41529	6.23595	6.32208
6874	-0.0575437	0.452641	6.70342	6.71959	6.60096	6.82381	6.6103	6.76384
6893	-0.0625884	0.69681	1.94554	2.15506	2.35037	2.02177	2.1918	2.41541
6904	-0.0113643	0.951948	3.92388	4.31909	4.3074	3.94311	4.17774	4.45476
6906	-0.0776931	0.665826	5.10495	5.50912	5.6211	5.3384	5.44705	5.67575
6909	0.0861786	0.280409	6.08467	6.01644	6.14515	6.12349	5.91569	5.95047
6915	1.0456	0.00533745	5.5898	5.60583	5.0957	4.04396	4.46732	4.64183
6921	-0.00407704	0.976651	1.91198	2.02434	2.10327	2.25237	1.9992	1.79992
6924	0.28563	0.131649	4.82343	4.88225	4.69404	4.55987	4.20934	4.77966
6926	0.152299	0.286158	4.13036	3.83218	3.79044	3.86882	3.60016	3.83694
6947	0.0236025	0.844006	6.92322	6.94549	6.89248	7.07884	6.94932	6.66245
6948	-0.167608	0.703834	7.10691	7.47835	8.05658	6.98796	8.20405	7.94762
6952	0.0259308	0.927002	-0.0846652	-0.231707	-0.51412	-0.11745	0.0355018	-0.825673
6953	-1.19926	0.00520935	-2.39882	-2.20805	-2.39882	-0.896372	-0.924433	-1.59485
6955	0.0747629	0.847895	4.89189	5.79358	5.70485	4.82729	5.82226	5.49368
6976	-0.25714	0.363503	6.60854	6.3105	5.83839	6.86062	6.37642	6.29914
6986	-0.320703	0.402262	-1.31744	-1.22376	-1.01741	-0.503189	-0.51412	-1.59485
6990	-0.174233	0.184682	0.778739	0.768814	0.825934	1.0102	1.12977	0.75081
7016	0.246674	0.371892	-0.439312	-0.447901	-0.912408	-1.20371	-0.439312	-0.912408
7029	-0.00974327	0.912971	6.75129	6.53399	6.49298	6.68426	6.57187	6.55357
7043	0.0523935	0.711946	6.03913	5.83901	5.58175	5.67087	5.75622	5.87918
7057	-0.0962672	0.460304	2.58982	2.61329	2.70874	2.49143	2.8992	2.80183
7058	0.426789	0.000423191	6.59376	6.51874	6.67977	6.16813	6.19897	6.14453
7060	0.00123963	0.992278	3.27013	3.11988	3.41021	3.06338	3.35126	3.37868
7086	-0.0555475	0.808785	4.4412	4.86343	4.75562	4.34848	4.82729	5.04018
7088	-0.243144	0.233295	1.39486	1.23403	0.75081	1.43016	1.35832	1.33407
7107	0.00876836	0.952754	7.49135	7.25451	6.97274	7.29623	7.22217	7.17533
7113	0.245184	0.344509	2.3924	2.65237	2.99306	2.0456	2.60418	2.6341
7128	-0.0126903	0.909323	4.4933	4.55651	4.33908	4.34632	4.42328	4.65769
7143	0.0327561	0.836072	4.49922	4.27103	4.09015	4.41663	4.31341	4.03783
7147	-0.212438	0.619069	4.46906	5.29359	5.43912	4.62588	5.51832	5.67282
7149	-0.0871213	0.46706	6.2997	6.42895	6.40679	6.33398	6.37147	6.69058
7150	-0.148829	0.122485	5.5197	5.41985	5.27416	5.61957	5.57369	5.4695
7160	0.32366	0.544847	6.6803	5.80076	4.99589	5.73215	5.7814	5.00603
7167	-0.078715	0.369599	5.97481	6.0112	6.14955	6.01915	6.10734	6.24369
7171	-0.0167088	0.853853	6.18161	6.13167	6.04821	6.30054	6.02614	6.08805
7177	-0.223748	0.400772	-2.39882	-2.20805	-2.16788	-2.13348	-1.59485	-2.39882
7179	-0.200345	0.07845	5.75295	5.69686	5.46214	5.91	5.82526	5.78054
7180	-0.198493	0.0482463	3.73665	3.91135	3.85852	3.98395	4.14632	3.96644
7182	0.034122	0.870188	6.21674	6.69997	6.64867	6.18365	6.70496	6.568
7185	0.0695138	0.210969	6.58643	6.59094	6.53725	6.58303	6.43583	6.48825
7190	-0.525948	0.348668	-5.93283	-5.93283	-5.93283	-5.93283	-5.93283	-4.34786
7228	0.037936	0.77781	3.64197	3.77578	3.85525	3.96669	3.60016	3.59377
7232	0.274005	0.277381	6.57318	6.54857	7.04037	6.68597	6.0721	6.58509
7246	-0.203124	0.185765	4.74172	5.04028	5.06048	4.95705	5.19117	5.29667
7252	0.0966456	0.692021	0.801418	0.363398	0.125305	0.625553	0.277617	0.125305
7261	-0.140531	0.187659	4.87256	5.01616	5.18632	5.09639	5.17556	5.22061
7265	0.0301815	0.921112	2.90339	3.57517	3.50963	2.8174	3.49022	3.56921
7270	-0.127978	0.0979737	4.21628	4.10417	4.10329	4.17431	4.2977	4.33633
7276	0.144246	0.205371	6.03368	6.11202	5.87274	5.71523	5.99074	5.87738
7281	-0.0733773	0.636213	5.17084	4.87504	4.65356	4.97544	5.0644	4.88454
7284	0.174436	0.196612	4.80275	4.91775	4.97895	4.50487	4.76328	4.90326
7285	0.0110253	0.933439	4.72843	4.92237	4.94876	4.85916	4.65128	5.0561
7289	0.0350553	0.831865	6.84162	6.48209	6.42621	6.7734	6.45525	6.42049
7290	0.0228287	0.70587	6.48932	6.48064	6.36707	6.34913	6.42674	6.49276
7323	-0.100002	0.0838712	8.49423	8.4275	8.42874	8.61251	8.48022	8.55832
7330	0.478293	0.0681685	-1.31744	-1.22376	-1.22376	-1.44103	-1.59485	-2.16788
7362	-0.474435	0.301308	5.89567	5.43723	5.22493	6.81064	5.52959	5.65948
7367	-0.525948	0.348668	-5.93283	-5.93283	-5.93283	-5.93283	-5.93283	-4.34786
7372	0.14916	0.352096	6.25905	6.02042	6.04376	6.17567	5.69726	6.00991
7382	0.262242	0.016017	2.208	2.40379	2.33203	2.00275	2.02434	2.12593
7387	0.0786411	0.681343	0.319432	-0.0116095	-0.288586	-0.179953	0.0355018	-0.0603286
7391	0.338348	0.36096	-1.20371	-0.596212	-0.51412	-1.20371	-0.583554	-1.59485
7399	0.180727	0.0237824	5.1411	4.97648	5.09023	4.93481	4.85928	4.87417
7400	0.00314851	0.987976	3.78671	3.55587	3.31358	3.89377	3.36515	3.40097
7401	-0.0763995	0.791164	0.998679	0.926842	0.562716	1.28576	0.399741	1.06432
7407	0.0131014	0.857305	3.84128	3.9394	3.83774	3.88458	3.74558	3.95032
7417	-0.100953	0.496169	0.102245	0.393576	0.429254	0.519767	0.480565	0.215265
7447	0.0782791	0.761355	-1.88484	-1.33932	-2.16788	-1.74594	-1.91494	-1.9691
7458	0.135498	0.275455	8.14795	7.78077	7.83248	7.76067	7.7424	7.8529
7469	0.783816	0.389251	-5.93283	-3.52999	-4.34786	-5.93283	-5.93283	-4.34786
7479	-0.0487324	0.792324	2.2784	2.07201	2.51741	2.62463	2.1918	2.2054
7497	0	1	14.3835	14.3835	14.3835	14.3835	14.3835	14.3835
7502	-0.724281	0.0156414	-2.77508	-3.06504	-3.06504	-1.91494	-2.39882	-2.39882
7516	-1.06626	0.0985078	-5.93283	-5.93283	-5.93283	-5.93283	-4.34786	-4.34786
7522	0.324058	0.238811	-0.889298	-0.51412	-0.656535	-1.44103	-1.01741	-0.596212
7537	0.57192	0.0685808	0.75081	1.08683	0.625553	0.519767	0.451871	-0.231707
7553	0.0352831	0.855133	8.62893	8.59133	8.1265	8.59384	8.46628	8.18174
7555	0.159279	0.565862	1.70112	1.65157	2.20979	1.58437	1.37678	2.12593
7586	-0.169183	0.740348	2.85406	2.57541	3.66349	4.04396	2.65885	2.91287
7589	-0.0622923	0.828689	-1.41915	-1.33932	-0.720788	-1.11686	-1.41915	-0.75805
7592	0.17863	0.658056	-1.88484	-2.71465	-3.06504	-2.71465	-2.39882	-3.06504
7593	-0.0354667	0.682103	5.40135	5.56622	5.6634	5.5393	5.65428	5.53955
7598	0.0255834	0.83864	5.64155	5.57419	5.9644	5.79499	5.65524	5.6531
7601	-0.0417993	0.678415	5.62668	5.7814	5.6816	5.70187	5.60235	5.91096
7626	0.203567	0.00546001	7.19059	7.14688	7.13097	6.99615	6.88213	6.98013
7629	0.167329	0.294947	0.552479	0.768814	0.660042	0.75081	0.277617	0.457736
7635	0.209781	0.0948722	1.92453	2.00898	1.81753	1.87138	1.69297	1.56012
7648	-0.372631	0.553453	-3.06504	-4.34786	-4.34786	-2.71465	-3.52999	-4.34786
7671	0.32755	0.36857	8.23859	8.34071	9.38109	8.35835	8.34764	8.26982
7672	0.370877	0.189601	2.73979	3.39725	3.54315	2.95034	2.68117	2.92676
7673	0.273775	0.144361	1.06432	1.21372	1.50074	1.1446	0.783276	1.0304
7699	-0.132308	0.562664	1.37678	1.58714	1.9992	1.98102	1.86747	1.50074
7711	0.0617067	0.774307	0.073594	-0.0668276	-0.161345	0.195415	-0.0116095	-0.51412
7712	-0.143187	0.509835	0.319432	-0.126357	-0.161345	-0.0116095	0.0355018	0.457736
7723	0.168662	0.484385	4.88182	4.77613	4.53497	4.99118	4.48706	4.21712
7726	-0.502109	0.0200768	2.43452	2.25237	1.96091	2.54996	2.82091	2.787
7736	-0.06146	0.613263	5.48372	5.23303	5.06188	5.31515	5.33858	5.31379
7739	0.272885	0.157035	3.81684	3.57844	3.7479	3.62745	3.58968	3.10943
7751	-0.0027928	0.993567	-2.39882	-2.43323	-1.77268	-2.71465	-1.74594	-2.16788
7756	-0.0179536	0.84246	5.01668	4.90938	4.8393	5.03828	4.79654	4.98967
7763	-0.190559	0.127296	3.9961	4.36165	4.24568	4.33599	4.42143	4.4111
7774	0.143539	0.255719	6.88991	7.03286	7.28712	6.9581	6.96115	6.85891
7779	-0.174732	0.262877	4.30106	4.24437	4.02863	4.61599	4.27927	4.20934
7782	-0.377149	0.0108941	3.0643	3.16203	3.0643	3.6417	3.32218	3.46155
7786	0.0310084	0.783287	4.31735	4.17909	4.22189	4.32284	4.30899	3.99482
7792	-0.519106	0.353098	-5.93283	-5.93283	-5.93283	-4.34786	-5.93283	-5.93283
7806	0.0268112	0.919878	4.76012	5.33623	5.47208	4.80959	5.30828	5.35559
7808	0.0270729	0.897666	1.75603	1.80401	1.98811	2.14112	1.89592	1.42873
7812	-0.155855	0.126717	9.75193	9.51259	9.46061	9.72859	9.75802	9.70691
7814	0.0149993	0.96527	-1.11686	-0.825673	-0.51412	-0.707426	-1.41915	-0.365862
7830	-0.0335207	0.826477	4.20998	4.12901	3.86882	4.34308	4.01556	3.95692
7835	0.12402	0.120867	6.67692	6.60854	6.6027	6.55938	6.57958	6.37722
7845	-0.000541038	0.997086	7.61018	7.40211	7.24405	7.64135	7.34062	7.27757
7857	-0.212657	0.0273679	3.83998	3.99982	3.88458	4.17431	4.02273	4.16555
7861	-0.103142	0.203348	7.61388	7.60101	7.63003	7.81347	7.57471	7.76681
7866	0.0959252	0.534911	2.66632	2.56996	2.76338	2.31469	2.56996	2.82439
7868	-0.0974959	0.334837	7.2233	7.14943	6.90799	7.15114	7.22975	7.19275
7871	-0.150246	0.137786	5.52502	5.29359	5.26211	5.56217	5.52622	5.44679
7879	-0.12837	0.32532	5.32212	5.12368	5.24709	5.57692	5.31379	5.19172
7884	0.0217599	0.794669	5.30828	5.11161	5.06864	5.21133	5.08747	5.12905
7886	-0.10413	0.12274	5.27168	5.278	5.37889	5.4568	5.32955	5.4554
7899	0.112871	0.0225948	7.00697	6.94062	6.95286	6.84892	6.826	6.88734
7904	0.124573	0.28116	3.479	3.5817	3.75387	3.37575	3.61989	3.43816
7909	0.0587775	0.806799	-0.169933	0.0355018	-0.347826	-0.351834	-0.51412	0.215265
7916	-0.157149	0.139697	3.92388	3.85554	3.9053	4.23311	3.93677	3.99084
7922	-0.27923	0.368242	-4.34786	-4.34786	-4.34786	-4.34786	-3.52999	-4.34786
7943	-0.0381375	0.824591	3.72116	4.20149	4.06937	3.82104	4.12431	4.14986
7946	-0.0399044	0.866118	5.81726	6.0615	6.38011	5.74856	6.29124	6.33049
7949	-0.0561009	0.858444	5.73791	5.77076	6.3453	5.51884	6.0579	6.43839
7957	0.0741872	0.6443	5.97169	6.1207	5.82226	5.61158	6.04887	6.02754
7960	-0.125904	0.0211226	6.01798	5.99346	5.94282	6.08046	6.09864	6.1534
7962	0.104307	0.349952	6.17771	6.18732	6.29592	6.32208	6.02091	6.00682
7965	-0.102843	0.397212	7.62129	7.61451	7.40704	7.84635	7.56393	7.54205
7974	0.947851	0.358973	-1.11686	-3.52999	-0.656535	-3.06504	-3.06504	-1.9691
7976	-0.0456022	0.494205	5.5824	5.78834	5.73585	5.73466	5.75316	5.75295
7987	0.599165	0.0618759	5.83983	5.40832	5.78223	5.32114	4.5944	5.33045
8007	-0.0815677	0.38696	5.62546	5.5516	5.44387	5.48934	5.63003	5.74693
8011	-0.202724	0.647432	3.86092	3.8515	4.2369	3.36672	4.28349	4.89534
8031	0.105519	0.470965	5.37156	5.28483	5.28515	5.49885	5.0277	5.10461
8034	0.154835	0.454254	3.89326	3.8515	3.53409	3.95111	3.51652	3.35503
8036	0.12069	0.200154	4.45079	4.50195	4.54006	4.40736	4.22417	4.50094
8037	0.00373435	0.986752	6.99488	6.82186	6.53575	7.03432	6.91126	6.39757
8038	-0.0851547	0.221959	6.29222	6.27404	6.18266	6.23554	6.35828	6.41039
8051	0.0350106	0.840544	6.21789	6.50673	6.34107	6.05834	6.6138	6.28243
8060	0.10075	0.311677	5.86565	5.7233	5.61337	5.75622	5.57436	5.57369
8065	-0.110888	0.281693	3.48824	3.48322	3.7402	3.68818	3.60016	3.75555
8067	0.0495265	0.352931	7.4412	7.48323	7.36801	7.44203	7.36974	7.33227
8068	-0.274329	0.352176	-0.75805	-0.231707	0.0811087	0.280867	-0.210704	-0.169933
8088	0.52214	0.353709	-5.93283	-5.93283	-4.34786	-5.93283	-5.93283	-5.93283
8111	-0.365657	0.463002	-0.376318	-1.44103	-1.01741	-1.31744	-0.439312	0.0355018
8119	0.361343	0.184914	-0.0116095	0.625553	0.684412	-0.11745	0.0869736	0.215265
8124	-0.071736	0.447592	5.50982	5.42412	5.46214	5.51307	5.70046	5.39625
8130	0.170304	0.643011	-1.59485	-2.03791	-1.22376	-1.20371	-2.16788	-1.9691
8135	-0.0922719	0.114254	4.65238	4.63162	4.57474	4.77667	4.71031	4.64991
8139	0.37945	0.444018	-1.88484	-1.44103	-1.01741	-1.59485	-2.67448	-1.20371
8145	0.538329	0.0855775	1.10103	1.81753	1.69297	0.722325	1.0102	1.23909
8151	-0.188773	0.115964	9.0374	9.38109	9.28571	9.38605	9.39713	9.48631
8152	-0.135646	0.467333	7.07829	7.47397	7.43205	7.17844	7.59465	7.61596
8156	0.136713	0.771711	-2.16788	-2.43323	-1.22376	-2.39882	-2.39882	-1.44103
8157	-0.146763	0.304215	2.30381	2.5277	2.30128	2.33976	2.49478	2.73384
8158	-0.123369	0.334404	7.81973	8.08153	7.99	7.88855	8.20079	8.17056
8170	0.108633	0.62509	3.38445	3.70631	3.63763	3.05503	3.58495	3.7508
8190	0.244736	0.0518972	3.68818	3.64693	3.91247	3.42679	3.61473	3.46762
8194	1.02494	0.199915	-1.31744	-2.03791	-1.77268	-4.34786	-1.91494	-1.9691
8205	0.982519	0.3397	-3.06504	-5.93283	-5.93283	-5.93283	-5.93283	-5.93283
8223	0.202688	0.607706	-1.01741	-0.75805	-1.61891	-1.01741	-1.01741	-1.9691
8225	0.17824	0.884829	-2.77508	-2.20805	-5.93283	-4.34786	-4.34786	-2.71465
8229	0.055942	0.367972	7.12721	7.31571	7.2608	7.18641	7.18756	7.16131
8232	-0.846782	0.451143	-5.93283	-4.34786	-4.34786	-3.06504	-5.93283	-3.06504
8235	0.057698	0.803398	2.88864	2.68117	2.68244	2.46452	2.46009	3.16203
8244	0.796885	0.0881249	3.75584	4.16888	4.2585	2.45172	3.65123	3.66605
8253	0.532168	0.618788	-5.93283	-2.71465	-4.34786	-4.34786	-5.93283	-4.34786
8256	0.161721	0.141868	7.06021	7.09646	7.04148	7.09481	6.85402	6.76496
8260	0.234933	0.0645607	2.42572	2.27907	2.1616	2.0456	1.94763	2.17621
8268	-0.449092	0.633786	-4.34786	-2.20805	-3.52999	-4.34786	-2.67448	-1.79456
8275	-1.05912	0.10104	-5.93283	-5.93283	-5.93283	-4.34786	-4.34786	-5.93283
8277	0.0157681	0.950831	0.356985	1.10491	1.08835	0.958924	0.669059	0.856992
8279	6.70077	0.0108887	3.29835	5.13595	2.67741	-2.39882	-3.06504	-3.52999
8280	-0.431902	0.217564	-0.231707	-0.596212	-0.912408	0.153346	0.0869736	-0.666555
8285	-0.280089	0.474319	4.28872	3.62526	3.45368	4.59889	4.09819	3.52894
8293	-1.77636e-15	1	-5.93283	-5.93283	-5.93283	-5.93283	-5.93283	-5.93283
8295	-0.0207799	0.726575	6.02754	6.10898	6.21674	6.1432	6.12043	6.15087
8298	0.0189859	0.872215	8.675	8.52365	8.3015	8.59133	8.41456	8.43858
8301	0.0631588	0.462086	9.25617	9.37362	9.54259	9.30914	9.35244	9.32054
8305	0.037867	0.775403	7.98071	7.85928	7.79642	8.09314	7.73279	7.69818
8307	-0.0112293	0.891751	5.73126	5.66452	5.53536	5.74385	5.67884	5.5441
8320	0.107335	0.195064	6.26431	6.16097	6.01212	6.02545	6.06068	6.03065
8324	-0.275901	0.238767	5.76096	5.54576	5.11745	5.97067	5.75849	5.52984
8332	-0.0275845	0.869422	4.34848	4.63924	4.61372	4.29457	4.57574	4.8066
8345	0.207656	0.0551371	5.47547	5.64866	5.55297	5.21641	5.46473	5.36848
8356	-0.203774	0.256322	3.65306	3.82681	4.02526	3.78132	4.08112	4.2461
8357	-0.0492949	0.13453	6.40733	6.38834	6.42559	6.4591	6.4682	6.44179
8360	-0.969959	0.342021	-5.93283	-5.93283	-4.34786	-5.93283	-4.34786	-3.06504
8365	-0.0138799	0.918495	5.85827	5.61112	5.69938	5.86633	5.49885	5.85215
8372	0.0162732	0.831541	5.46623	5.49711	5.50692	5.61287	5.45245	5.35692
8391	-0.100272	0.101595	6.22923	6.15368	6.0787	6.25337	6.22028	6.29024
8402	-1.77636e-15	1	-5.93283	-5.93283	-5.93283	-5.93283	-5.93283	-5.93283
8407	-0.0149972	0.954442	-1.20371	-1.85475	-1.77268	-1.91494	-1.41915	-1.44103
8430	0.52214	0.353709	-5.93283	-5.93283	-4.34786	-5.93283	-5.93283	-5.93283
8501	0.0360475	0.91435	7.96512	8.61861	8.81301	7.94287	8.69143	8.65002
8526	-0.396189	0.167889	-0.0116095	-0.0668276	-0.347826	0.117289	-0.0603286	0.722325
8541	0.269325	0.289221	6.4872	6.15229	6.06337	6.40093	5.77622	5.72655
8561	-0.249012	0.0239886	2.19349	2.36897	2.43766	2.54461	2.62463	2.57129
8565	-0.0612859	0.539496	5.27013	5.43635	5.41844	5.60251	5.33077	5.3759
8568	-0.178788	0.054023	4.09039	4.23606	4.12323	4.21545	4.39991	4.36676
8577	-0.037552	0.887054	6.60974	6.84699	7.12577	6.49188	7.30473	6.89314
8604	-0.268258	0.0705828	0.703512	0.552479	0.525779	1.0102	0.669059	0.922623
8611	0.100767	0.897909	-4.10221	-5.93283	-5.93283	-5.93283	-5.93283	-4.34786
8628	0.115234	0.315356	6.14568	5.86025	5.94052	5.91861	5.72862	5.9587
8638	0.280439	0.136255	4.63668	4.71935	4.67462	4.68854	4.41663	4.08531
8639	0.136711	0.380737	-0.0116095	-0.387249	-0.0603286	-0.179953	-0.439312	-0.231707
8640	-1.19288	0.0468237	-2.77508	-4.34786	-3.52999	-1.91494	-2.39882	-2.71465
8651	0.0478689	0.855809	6.6418	6.33033	5.71726	6.2241	6.23595	6.09109
8656	0.257277	0.259028	1.5669	1.1446	1.23403	1.40956	0.983194	0.801418
8657	0.217296	0.0421322	6.73748	6.54076	6.53303	6.30582	6.37339	6.48128
8665	-0.277747	0.762006	-5.93283	-3.52999	-5.93283	-5.93283	-4.34786	-4.34786
8678	-0.0196045	0.978455	-5.93283	-4.34786	-5.93283	-5.93283	-4.34786	-5.93283
8688	-0.0435859	0.781059	4.18551	3.99982	3.66349	4.07635	3.90062	4.01108
8696	-0.225717	0.45893	-0.439312	-0.347826	-1.11686	-0.351834	-0.11745	-0.75805
8701	-1.77636e-15	1	-5.93283	-5.93283	-5.93283	-5.93283	-5.93283	-5.93283
8707	-0.327555	0.221638	-1.9691	-1.22376	-1.22376	-1.11686	-1.14244	-1.20371
8728	-0.048239	0.701333	4.98516	4.71599	4.95296	4.77667	4.91405	5.10981
8787	0.180717	0.893956	-2.62623	-5.93283	-3.06504	-3.52999	-2.67448	-5.93283
8788	1.15014	0.0566753	-4.10221	-4.34786	-4.34786	-4.34786	-5.93283	-5.93283
8791	0.0454439	0.918913	3.9108	4.41482	4.6192	3.4583	4.89632	4.42554
8796	0.999798	0.338262	-3.52999	-3.06504	-2.16788	-2.71465	-5.93283	-3.06504
8827	0.114593	0.454008	2.62463	2.57541	2.30128	2.59906	2.36051	2.2054
8831	-0.0593414	0.607786	4.70228	4.48427	4.67116	4.85454	4.5298	4.65769
8857	-0.0121179	0.868812	5.28142	5.45263	5.23009	5.3759	5.33215	5.29167
8862	0.038718	0.839721	5.91121	6.15627	6.0757	5.70187	6.34686	5.9699
8865	-0.0777609	0.684008	5.25965	5.5686	5.638	5.27748	5.83133	5.5801
8888	-0.0376582	0.772908	3.76251	3.70631	3.60719	3.51066	3.73193	3.94617
8894	-0.140739	0.271565	7.561	7.61983	7.64997	7.98438	7.68989	7.5791
8920	-0.321154	0.771374	-4.10221	-3.52999	-5.93283	-3.52999	-5.93283	-3.06504
8924	-0.0944611	0.643112	5.27964	5.04028	4.88947	5.52276	5.01036	4.96945
8926	0.52214	0.353709	-5.93283	-5.93283	-4.34786	-5.93283	-5.93283	-5.93283
8927	-0.338034	0.145518	2.43452	2.3597	2.77091	2.64619	2.73078	3.20035
8968	0.848804	0.0635844	5.20673	5.01849	5.07872	3.51486	4.92342	4.30362
8972	0.0607415	0.71374	6.28846	6.75454	6.65755	6.35118	6.48256	6.68113
8976	-0.178755	0.164557	5.25575	5.20974	4.91405	5.40518	5.23538	5.27964
8980	-0.015416	0.92076	4.89884	5.08497	4.82303	4.71148	5.20002	4.93454
8982	-0.114604	0.50378	4.89934	5.12008	5.35364	5.02017	5.278	5.41166
8988	-0.20508	0.0464522	3.39989	3.50373	3.47433	3.68818	3.53024	3.77578
8995	0.961106	0.302637	-4.10221	-3.52999	-2.39882	-5.93283	-3.52999	-3.52999
9015	0.502396	0.0390717	2.44604	2.3427	1.8482	1.70623	1.77001	1.66005
9054	0.265736	0.462004	4.55822	4.27739	3.56656	3.47972	4.23437	3.89087
9075	0.140034	0.215614	5.0598	5.23829	5.40173	5.15499	5.08383	5.0378
9084	0.000907408	0.996626	3.45546	3.66043	3.20866	3.73841	3.47972	3.10558
9100	-1.74161	0.0383439	-3.52999	-4.34786	-5.93283	-2.39882	-3.06504	-3.06504
9108	0.0505911	0.623044	5.97593	5.77956	5.74104	5.78877	5.65348	5.90702
9126	-0.0902254	0.328542	5.02468	5.18252	5.13865	5.0817	5.33623	5.19361
9127	0.542518	0.340673	-4.34786	-5.93283	-5.93283	-5.93283	-5.93283	-5.93283
9129	0.0161629	0.899355	2.07741	2.23555	2.23555	1.93638	2.2205	2.3344
9138	0.0905508	0.556375	4.07779	4.51684	4.39625	4.08301	4.25638	4.37144
9151	-0.109101	0.219401	5.2358	5.29486	5.4456	5.34463	5.43254	5.52397
9170	0.0140528	0.920879	5.19249	4.94682	4.70378	4.95132	4.9867	4.86773
9173	0.0259654	0.916599	9.62191	9.41333	8.90084	9.51949	9.33038	9.01007
9183	0.165668	0.138516	5.83983	5.99759	6.1506	5.89532	5.74767	5.84682
9195	-0.0212764	0.497916	7.58448	7.59884	7.61706	7.59297	7.64677	7.62427
9203	0.327409	0.0570668	2.98551	3.20866	2.87549	2.49143	2.83746	2.7512
9247	-0.149211	0.688874	5.36684	5.91631	6.01666	5.24481	6.21242	6.27404
9252	0.655139	0.174585	5.05001	4.96791	4.03783	4.51061	4.17369	3.4158
9268	-0.189498	0.572688	-0.169933	-1.33932	-0.912408	-0.560077	-0.583554	-0.666555
9277	1.16517	0.00442303	3.59192	3.45261	3.55558	2.03193	2.16246	2.91287
9281	-0.0987781	0.433107	5.57385	5.71515	5.97169	5.90242	5.75849	5.89432
9284	0.102444	0.0854358	7.11762	7.06527	7.00214	7.02102	6.93765	6.91964
9310	-0.0813448	0.285518	5.55586	5.62561	5.68529	5.70977	5.80076	5.59763
9326	-0.738003	0.207646	3.52894	3.58766	3.21779	5.24481	3.49022	3.83694
9331	-0.023368	0.723888	6.45067	6.54346	6.58811	6.47482	6.53332	6.64321
9365	-0.540288	0.00408211	2.59767	2.76179	2.57541	3.37575	3.10293	3.07871
9377	0.360668	0.701428	-4.10221	-4.34786	-5.93283	-3.52999	-5.93283	-5.93283
9378	0.117056	0.890067	-1.41915	-2.43323	-0.825673	-0.439312	-3.06504	-1.44103
9388	-0.0486246	0.915303	5.02247	5.86968	6.00109	4.94172	6.16442	5.90861
9402	-0.0251029	0.888357	6.17997	5.83783	5.59785	5.93756	6.00991	5.74789
9412	0.214016	0.219295	3.9961	3.83218	4.26498	3.99482	3.62425	3.83694
9414	0.0687124	0.772153	2.3924	2.61692	3.01585	2.32913	2.8992	2.57129
9428	-0.105005	0.608837	4.94346	4.88713	5.0168	5.41955	4.69848	5.05275
9431	-0.0771483	0.544131	3.56455	3.39313	3.42013	3.6997	3.31666	3.60169
9445	-0.0171063	0.917369	3.27013	3.5485	3.50616	3.18466	3.6912	3.48824
9457	-0.0585427	0.830007	5.08287	5.278	5.5322	4.86637	5.73163	5.45707
9458	-1.77636e-15	1	-5.93283	-5.93283	-5.93283	-5.93283	-5.93283	-5.93283
9496	0.316242	0.614179	-1.31744	-2.71465	-1.33932	-2.39882	-2.67448	-1.20371
9497	-0.0560923	0.697235	4.17263	4.38153	4.44636	4.14699	4.46249	4.55182
9512	-0.0232317	0.783127	7.59297	7.79018	7.87151	7.81039	7.76332	7.74995
9552	-1.77636e-15	1	-5.93283	-5.93283	-5.93283	-5.93283	-5.93283	-5.93283
9580	-0.251667	0.329596	-3.06504	-2.43323	-3.06504	-2.71465	-2.39882	-2.71465
9591	0.0263543	0.499436	7.47624	7.48833	7.51823	7.43067	7.45182	7.52115
9593	-0.0315499	0.866267	5.11184	5.19172	5.32345	4.88767	5.3044	5.52397
9594	-1.77636e-15	1	-5.93283	-5.93283	-5.93283	-5.93283	-5.93283	-5.93283
9603	0.00706845	0.934675	5.6816	5.57608	5.61804	5.75871	5.47829	5.62165
9617	0.633225	0.120083	0.778739	0.262461	-0.347826	-0.351834	-0.583554	-0.231707
9620	0.223153	0.334494	5.03959	4.76642	4.5584	4.82123	4.21294	4.67492
9621	0.412051	0.0387624	4.29313	4.02324	3.78476	3.59863	3.72772	3.54315
9628	-0.0298651	0.845516	5.45334	5.31379	5.02662	5.49054	5.18297	5.21686
9639	-1.77636e-15	1	-5.93283	-5.93283	-5.93283	-5.93283	-5.93283	-5.93283
9645	-1.77636e-15	1	-5.93283	-5.93283	-5.93283	-5.93283	-5.93283	-5.93283
9652	-0.786653	0.349018	-5.93283	-5.93283	-5.93283	-3.52999	-5.93283	-5.93283
9653	-1.77636e-15	1	-5.93283	-5.93283	-5.93283	-5.93283	-5.93283	-5.93283
9654	-1.77636e-15	1	-5.93283	-5.93283	-5.93283	-5.93283	-5.93283	-5.93283
9659	-0.583942	0.0889856	0.073594	-0.0116095	0.95038	0.823481	1.06432	0.856992
9661	-1.77636e-15	1	-5.93283	-5.93283	-5.93283	-5.93283	-5.93283	-5.93283
9664	-0.143499	0.630607	-0.459353	-0.126357	0.319432	-0.351834	0.138545	0.344491
9666	-1.595	0.0831107	-4.34786	-5.93283	-4.34786	-2.39882	-3.06504	-4.34786
9700	-0.160326	0.118004	8.78478	8.67234	8.7119	9.03296	8.87712	8.74052
9701	-0.128664	0.358479	9.10606	8.9218	8.8323	9.22542	9.16274	8.85874
9703	0.112733	0.566602	6.15066	6.29592	6.50715	5.9152	6.51768	6.17577
9707	-0.0166279	0.858295	5.99025	6.00217	6.16073	6.21967	5.97162	6.0129
9734	-0.221319	0.201189	0.073594	-0.288586	-0.347826	0.117289	-0.11745	0.125305
9742	-0.0419579	0.766162	-0.126357	-0.189202	0.0355018	-0.288586	0.0869736	0.0355018
9756	0.425475	0.374982	5.65023	5.27479	4.79949	4.27661	5.64521	4.51702
9767	0.0408536	0.718333	3.13551	3.05129	2.79957	2.91542	2.8992	3.054
9771	-0.0447152	0.789971	5.7213	5.744	5.72489	5.44822	6.04749	5.82254
9779	-0.0845639	0.505428	4.53688	4.50848	4.33599	4.70878	4.5944	4.3342
9789	-0.0582507	0.713724	6.34387	6.22178	6.15191	6.6027	6.19897	6.09467
9816	1.77859	0.109986	-1.9691	-2.20805	-1.61891	-2.39882	-5.93283	-2.71465
9817	0.700875	0.15259	2.93491	3.06259	2.85519	3.13286	1.48387	2.16392
9818	0.887065	0.231196	-4.10221	-2.20805	-2.39882	-3.52999	-4.34786	-3.52999
9834	0.0734244	0.692929	8.57127	8.41666	8.13956	8.53432	8.34215	8.03196
9840	0.00303438	0.996651	-5.93283	-5.93283	-4.34786	-4.34786	-5.93283	-5.93283
9841	0.522729	0.484761	-5.93283	-4.34786	-4.34786	-4.34786	-5.93283	-5.93283
9844	0.133745	0.274823	3.89326	3.81228	4.1914	3.82783	3.8361	3.83013
9909	0.00732697	0.961435	7.08893	7.39325	7.58629	7.28952	7.2818	7.47397
9918	-0.294333	0.00299421	3.42867	3.34424	3.35777	3.74175	3.60016	3.67529
9922	0.189348	0.344878	6.3238	6.23554	6.31492	5.70389	6.34054	6.25704
9931	0.0650383	0.662989	5.76941	5.61987	5.70558	5.90715	5.39754	5.60173
9933	0.520304	0.354899	-5.93283	-4.34786	-5.93283	-5.93283	-5.93283	-5.93283
9937	-0.220215	0.518387	0.979186	1.83275	2.08124	1.71882	1.75411	2.05338
9943	0.152566	0.290194	2.91233	2.583	2.62463	2.64619	2.37968	2.64881
9947	-0.0660918	0.472384	4.698	4.56478	4.49887	4.78428	4.62082	4.55922
9950	0.0485156	0.878148	-2.39882	-2.20805	-2.39882	-1.74594	-2.67448	-2.71465
9957	1.45227	0.0526246	-4.10221	-3.06504	-3.06504	-4.34786	-4.34786	-5.93283
9960	-1.77636e-15	1	-5.93283	-5.93283	-5.93283	-5.93283	-5.93283	-5.93283
9961	-0.0252458	0.882911	4.10939	4.23129	4.61372	4.47313	4.3894	4.16291
9962	0.119595	0.414934	2.01865	2.33203	2.26859	2.2784	2.07	1.90759
9979	-0.0575242	0.934251	0.650502	0.552479	2.4969	0.552479	1.44193	1.83712
9980	-0.399132	0.05995	0.356985	0.552479	0.801418	0.75081	1.15841	0.977539
9985	-0.0611492	0.621713	4.69921	4.4417	4.27064	4.54575	4.52539	4.5298
9987	-0.185231	0.589654	-1.20371	-1.22376	-1.9691	-0.798163	-1.41915	-1.59485
9994	-0.441321	0.55698	-1.74594	-2.43323	-3.52999	-2.13348	-3.06504	-1.11686
10007	-0.138207	0.413628	2.56085	2.98551	2.96035	3.11108	3.01479	2.787
10016	0.0906648	0.557695	3.38973	3.68818	3.73428	3.28868	3.66202	3.57844
10020	0.0306367	0.8501	7.87373	7.5763	7.34867	7.63572	7.42306	7.64997
10029	-0.0152742	0.888907	4.87256	4.96945	5.18297	4.90568	5.12189	5.0378
10039	0.00287753	0.987632	4.35932	4.76642	4.93713	4.50487	4.78049	4.75778
10061	-0.267386	0.524854	-2.77508	-3.52999	-3.52999	-3.06504	-3.52999	-2.39882
10062	-0.0930436	0.717418	2.79957	2.91287	3.25431	3.53442	2.93902	2.77454
10072	0.154633	0.435975	6.85829	6.5724	6.50094	6.31202	6.32959	6.82882
10079	0.934505	0.317757	-3.52999	-3.06504	-2.71465	-3.06504	-5.93283	-3.06504
10102	-0.219783	0.168855	3.6108	3.50373	3.30634	3.83722	3.78476	3.46155
10121	0.0559207	0.63399	6.12843	6.01915	5.92325	5.80189	6.15855	5.94096
10123	-0.120899	0.214681	4.48493	4.48706	4.53759	4.7315	4.45299	4.69115
10125	0.259261	0.229241	4.17263	3.62021	3.63067	3.37575	3.58968	3.68818
10126	0.0190984	0.876427	7.53655	7.5735	7.74486	7.8018	7.57091	7.42495
10137	-0.347855	0.146547	0.662547	1.00305	1.40094	1.24682	1.37678	1.46681
10165	-0.0609354	0.254087	7.15414	7.19422	7.22217	7.16983	7.28952	7.29351
10173	-0.159696	0.342865	4.73936	4.59374	4.55253	5.09639	4.6953	4.57989
10180	0.0580612	0.623322	5.8636	5.72212	5.68619	5.86252	5.74133	5.49651
10185	-0.0746356	0.330334	5.99911	6.03197	5.91746	6.18203	5.9758	6.01655
10188	0.0381474	0.338333	7.69982	7.63239	7.67983	7.65109	7.58864	7.65822
10190	0.00128056	0.992877	4.0042	4.24691	4.33121	4.06839	4.09313	4.41264
10198	-0.222861	0.00621006	7.85928	7.8073	7.74294	8.04827	7.96069	8.06969
10201	-0.0333227	0.795206	5.52789	5.74083	5.83095	5.54202	5.78961	5.86252
10206	-0.0550448	0.723554	3.60495	3.7107	3.89035	3.52894	3.84053	3.99482
10220	-0.274172	0.0551445	6.10068	6.00963	6.34204	6.55723	6.34861	6.3697
10239	-0.914566	0.13354	-1.41915	-2.71465	-1.33932	-0.231707	-1.41915	-1.01741
10246	0.0619875	0.893229	-2.16788	-2.71465	-1.22376	-2.39882	-1.74594	-2.16788
10256	0.640728	0.188039	-0.439312	-1.59485	-0.51412	-1.91494	-1.41915	-1.11686
10271	-0.497924	0.465225	-2.39882	-3.52999	-4.34786	-3.06504	-2.16788	-3.52999
10276	-0.19919	0.177306	4.45281	4.35626	4.77315	4.65906	4.68075	4.83875
10285	0.0811001	0.826541	-0.0603286	-1.01741	0.125305	-0.560077	-0.11745	-0.51412
10295	-1.04454	0.106297	-5.93283	-5.93283	-5.93283	-4.34786	-5.93283	-4.34786
10309	0.106127	0.737929	4.36203	4.7944	4.70777	3.9145	4.94001	4.67214
10310	0.000315075	0.99911	4.03201	4.62718	4.49887	3.9145	4.68075	4.54322
10328	0.159978	0.597416	6.53438	6.62738	7.34617	6.31395	6.82255	6.88701
10374	0.21738	0.469751	1.75411	1.06432	1.94763	1.28576	1.64119	1.18625
10394	0.374225	0.108838	6.15627	5.82787	5.81406	5.89863	5.50614	5.278
10396	0.0695509	0.744791	5.05703	4.69202	4.65967	5.09639	4.62082	4.49399
10405	-0.0806691	0.450203	4.45281	4.21693	4.24568	4.47725	4.44208	4.24182
10415	0.470543	0.015429	3.11298	2.72659	2.73139	2.31469	2.44678	2.40379
10418	0.351231	0.14698	1.50074	1.6737	2.13837	1.57126	1.46445	1.21372
10447	-1.14862	0.19037	-4.34786	-2.71465	-1.61891	-2.39882	-1.14244	-1.79456
10454	-0.190692	0.211358	5.43254	5.24649	5.13217	5.67467	5.43598	5.278
10467	0.381012	0.293458	-0.126357	0.332611	-0.720788	-0.231707	-0.656535	-0.75805
10484	0.839352	0.170205	-2.16788	-2.43323	-2.39882	-2.39882	-4.34786	-2.71465
10504	-0.00507153	0.993083	-4.34786	-3.06504	-4.34786	-4.34786	-4.34786	-3.06504
10506	-0.525948	0.348668	-5.93283	-5.93283	-5.93283	-5.93283	-5.93283	-4.34786
10532	-0.432225	0.112925	0.429254	0.332611	-0.288586	0.393576	0.755434	0.625553
10537	0.944006	0.358645	-4.34786	-3.06504	-5.93283	-5.93283	-4.34786	-5.93283
10541	-0.205244	0.0136991	7.62427	7.62655	7.75424	7.86304	7.82026	7.93746
10552	-0.0793697	0.271638	5.17084	5.31725	5.34168	5.28232	5.38258	5.39974
10561	-0.0617854	0.813036	7.41272	7.91096	8.21687	7.64135	7.95489	8.12691
10562	-0.0440551	0.4441	6.63237	6.62898	6.66048	6.61053	6.66009	6.78321
10574	0.127632	0.487111	6.37874	6.33569	6.38256	6.04922	6.05226	6.61375
10585	-0.0409377	0.864658	5.73955	5.61112	4.94876	5.36906	5.56466	5.49247
10604	-0.032139	0.856042	5.58429	5.6324	5.99808	5.56217	5.73319	6.01212
10630	0.0198174	0.839976	4.63668	4.5807	4.40258	4.62766	4.54339	4.39224
10633	0.135189	0.580252	-0.583554	-0.75805	-0.912408	-1.11686	-0.439312	-1.11686
10637	0.0160479	0.89586	3.80509	3.69246	3.59226	3.8888	3.64197	3.51652
10644	1.24281	0.0246358	8.83486	9.00103	9.46575	8.54922	7.83638	7.18756
10648	1.25418	0.220204	-1.01741	-1.33932	-2.71465	-1.31744	-4.34786	-3.06504
10658	-0.291849	0.274282	0.778739	0.457736	-0.102478	0.625553	0.627626	0.778739
10670	-0.0284037	0.976348	-5.93283	-3.52999	-4.34786	-4.34786	-3.52999	-5.93283
10675	-1.51986	0.0413476	-4.10221	-5.93283	-4.34786	-2.71465	-3.52999	-3.52999
10698	-0.0714532	0.70621	2.26053	2.4708	2.1616	2.61459	2.04	2.46223
10705	0.00103399	0.998345	-2.77508	-2.43323	-3.52999	-3.06504	-2.16788	-3.52999
10724	-0.0674785	0.526601	5.38164	5.51552	5.58714	5.46996	5.47829	5.73668
10743	0.134716	0.323842	13.0631	13.0631	13.0631	12.658	13.0631	13.0631
10760	-0.0736973	0.657613	4.15376	4.14938	3.9642	4.27064	4.36731	3.84934
10763	-0.176251	0.206612	4.55822	4.66149	4.4244	4.50229	4.80134	4.86609
10793	-0.666252	0.0790926	-2.16788	-2.03791	-3.06504	-1.74594	-1.91494	-1.59485
10801	0.100298	0.923198	-4.10221	-3.52999	-3.52999	-2.39882	-5.93283	-3.06504
10802	0.120226	0.585658	6.30059	5.94064	5.66167	6.11293	5.70209	5.73668
10814	0.53864	0.0977941	-3.52999	-3.52999	-3.52999	-4.34786	-3.52999	-4.34786
10815	-1.77636e-15	1	-5.93283	-5.93283	-5.93283	-5.93283	-5.93283	-5.93283
10838	-0.260049	0.380793	3.75324	3.78476	4.23353	4.65082	4.13013	3.77176
10840	0.237124	0.568161	2.78941	2.44604	2.43766	3.17164	1.9992	1.81845
10841	-0.209208	0.349588	3.84934	3.77118	3.82243	4.46831	3.8073	3.80392
10842	-0.415108	0.0222562	1.66005	1.81753	1.78811	2.26859	1.93046	2.31556
10849	-0.488247	0.466959	-2.62623	-3.52999	-3.06504	-1.44103	-3.52999	-2.71465
10855	-0.298025	0.387238	-0.126357	-1.11686	-0.288586	-0.11745	-0.51412	0.0355018
10859	0.11692	0.410393	4.21628	3.97951	4.2975	4.25171	3.99137	3.90404
10877	-0.0714883	0.706184	4.40924	4.20911	4.24568	4.59306	4.49746	3.99084
10883	0.0444869	0.565757	6.38751	6.35061	6.23543	6.38751	6.1796	6.27527
10890	0.49736	0.392406	-0.825673	0.0869736	0.0811087	-1.31744	0.277617	-1.20371
10918	1.09438	0.00449552	4.54882	4.13976	3.82681	2.90799	3.26527	3.06298
10921	0.0553214	0.833046	-0.75805	-0.347826	-0.215513	-0.11745	-0.852158	-0.51412
10924	0.00722085	0.973866	-0.376318	-0.288586	-0.825673	-0.231707	-0.743902	-0.51412
10929	-0.415692	0.664319	-4.34786	-4.34786	-5.93283	-3.06504	-4.34786	-5.93283
10938	-0.032244	0.922744	-1.88484	-2.03791	-2.71465	-2.39882	-1.74594	-2.39882
10940	0.0234117	0.974284	-4.34786	-5.93283	-5.93283	-4.34786	-5.93283	-5.93283
10949	-1.45598	0.0422287	-4.34786	-4.34786	-3.52999	-2.13348	-3.52999	-2.16788
10961	0.2767	0.532208	-1.20371	-2.20805	-2.16788	-1.74594	-1.91494	-2.71465
10964	0.538014	0.153226	-0.583554	-0.0668276	0.0355018	-0.179953	-0.852158	-1.20371
10965	0.734269	0.249811	-2.62623	-4.34786	-3.06504	-4.34786	-3.52999	-4.34786
10966	-0.0763048	0.622529	1.27286	1.21372	1.03357	1.37374	1.3994	0.977539
10990	0.157328	0.15439	7.78271	7.82151	7.51673	7.55749	7.4937	7.5983
11020	-0.519106	0.353098	-5.93283	-5.93283	-5.93283	-4.34786	-5.93283	-5.93283
11049	0.567765	0.176434	2.45667	2.00898	2.17984	1.65422	0.983194	2.3344
11051	0.0800236	0.666269	2.66632	2.61329	2.79957	2.81178	2.2506	2.787
11079	-0.10519	0.483528	3.19768	2.99844	3.19588	3.4719	3.23709	3.00311
11086	0.165376	0.532292	0.854587	0.138545	0.393576	0.625553	0.0869736	0.215265
11095	0.2869	0.737956	-4.34786	-3.52999	-5.93283	-4.34786	-5.93283	-4.34786
11099	-0.131126	0.126221	6.71778	6.60574	6.58437	6.88734	6.68004	6.73566
11104	-0.0917085	0.442355	4.76012	4.51435	4.64917	4.92149	4.66773	4.61536
11109	0.047538	0.493129	7.14223	6.99793	6.94787	7.03522	6.98361	6.92745
11111	-0.043806	0.795149	5.71523	5.95266	6.11293	5.70389	6.10079	6.1005
11117	-0.373428	0.510313	1.79756	2.50808	3.10943	1.94554	3.29751	3.24861
11136	-0.242838	0.259023	6.38438	6.69693	6.97429	6.7347	6.88991	7.15644
11138	-0.0533454	0.664109	1.58437	1.78623	1.48387	1.79178	1.5174	1.70957
11153	-0.0122816	0.950339	6.68782	6.28861	6.01212	6.46981	6.28861	6.27253
11159	0.132672	0.264888	8.022	8.15371	8.40445	8.01835	8.07964	8.0832
11164	-0.0269658	0.877366	4.52405	4.7961	4.99268	4.55318	4.92136	4.90925
11171	-0.21147	0.00204621	4.91378	4.91536	4.98817	5.16459	5.14021	5.14667
11176	-1.77636e-15	1	-5.93283	-5.93283	-5.93283	-5.93283	-5.93283	-5.93283
11185	0.215064	0.245564	5.62102	5.28772	5.03995	5.06935	5.20796	5.03071
11191	-0.122826	0.176382	7.36648	7.39889	7.57471	7.64437	7.47195	7.59233
11195	0.0907305	0.237424	6.36475	6.29914	6.32988	6.37559	6.18498	6.1627
11211	-0.181638	0.480053	4.33178	4.22691	4.34148	4.95705	4.43316	4.06075
11220	0.52214	0.353709	-5.93283	-5.93283	-4.34786	-5.93283	-5.93283	-5.93283
11227	0.108748	0.446267	6.36457	6.2092	6.41347	6.32555	5.96321	6.37601
11232	0.0239281	0.791261	5.30675	5.23443	5.49385	5.38739	5.34549	5.22989
11235	-0.0378933	0.813892	6.24534	6.34054	6.2856	6.10619	6.64996	6.2241
11236	0.13464	0.542269	3.78132	4.29691	4.3074	3.77008	3.93993	4.26142
11247	0.382235	0.298828	-0.376318	-0.679917	-1.01741	-1.11686	-0.51412	-1.59485
11254	0.0130968	0.873679	6.57366	6.44774	6.38638	6.52442	6.51108	6.33398
11264	0.00296659	0.972301	6.08087	6.16629	6.30334	6.28354	6.08966	6.16848
11266	0.0663772	0.419404	6.97796	7.03952	7.18157	6.97527	6.92549	7.09893
11292	-0.0119728	0.898534	4.83804	4.79024	5.00552	4.89725	4.76924	5.00453
11303	-0.400788	0.25021	-2.62623	-2.20805	-1.61891	-1.91494	-1.91494	-1.44103
11319	0.00870123	0.859987	6.7641	6.6418	6.63619	6.70027	6.65153	6.66521
11321	-0.140772	0.729419	7.2772	8.06355	8.40795	7.53118	8.25112	8.38402
11325	0.137111	0.269895	6.5086	6.39553	6.43321	6.53738	6.1605	6.23155
11332	-0.0319997	0.64023	6.09115	6.11451	6.10778	6.06308	6.079	6.26735
11340	-0.275839	0.533051	-0.347826	-0.679917	-1.33932	0.195415	-0.852158	-0.825673
11354	-0.440844	0.0808991	0.594479	0.422755	0.393576	1.23403	0.547014	0.977539
11361	-1.06487	0.206854	-5.93283	-5.93283	-3.52999	-4.34786	-4.34786	-3.52999
11379	0.190707	0.304328	2.30849	2.17621	1.94763	2.2054	1.97096	1.69297
11390	0.213734	0.115276	0.778739	0.588754	0.801418	0.69129	0.451871	0.393576
11392	-1.83065	0.138435	-4.34786	-2.20805	-5.93283	-3.06504	-1.27889	-2.71465
11401	0.0204631	0.977427	-4.34786	-5.93283	-4.34786	-4.34786	-5.93283	-4.34786
11405	-0.361275	0.0784858	2.2784	1.96091	1.86291	2.63854	2.3427	2.2191
11439	-0.713324	0.152202	2.57541	2.62463	3.26017	4.32046	3.3008	2.98359
11442	-0.695561	0.0968529	2.06903	2.07201	2.67741	3.56093	2.83746	2.50922
11443	-0.715361	0.0994007	2.33976	2.54601	3.01585	3.99838	3.11754	2.93298
11450	-0.0307906	0.794034	8.8323	8.97655	9.15826	8.89377	9.0065	9.15826
11459	-0.00469946	0.965705	5.56283	5.60235	5.87208	5.75622	5.57564	5.71938
11470	-0.0717902	0.591636	4.27145	4.51684	4.49399	4.29073	4.5298	4.67072
11485	-0.05928	0.593991	5.40851	5.29947	5.5026	5.65524	5.36171	5.37461
11486	-0.313474	0.137048	1.64366	2.04095	1.92453	2.0456	2.01663	2.48015
11493	-1.77636e-15	1	-5.93283	-5.93283	-5.93283	-5.93283	-5.93283	-5.93283
11496	0.118482	0.825922	-2.77508	-3.52999	-3.52999	-2.71465	-4.34786	-3.06504
11517	-0.657629	0.0214745	-1.74594	-1.85475	-1.9691	-1.44103	-0.852158	-1.31744
11520	0.0782597	0.549299	4.30106	4.19698	4.04647	4.32046	4.03252	3.96297
11530	-0.539909	0.339739	-5.93283	-5.93283	-5.93283	-5.93283	-4.34786	-5.93283
11537	-0.272726	0.0515591	3.71132	3.82681	3.7402	3.81684	4.11192	4.16291
11548	0.474576	0.230566	0.0355018	1.10491	0.234551	-0.351834	0.138545	0.125305
11567	-0.253815	0.274916	6.3143	6.10898	5.59705	6.29513	6.10489	6.38862
11588	0.273988	0.011185	2.85948	2.84411	2.6946	2.59906	2.46009	2.5214
11600	-0.114393	0.0600921	5.05275	5.11461	5.00144	5.14609	5.14021	5.22575
11603	0.0447758	0.729113	3.27248	2.96227	2.94469	3.14532	3.02049	2.88706
11604	0.237517	0.511383	4.33365	3.88671	3.56957	4.28711	3.29202	3.52206
11617	0.598581	0.576437	-2.62623	-3.52999	-3.06504	-2.39882	-2.67448	-5.93283
11629	-1.77636e-15	1	-5.93283	-5.93283	-5.93283	-5.93283	-5.93283	-5.93283
11643	0.575416	0.168235	4.7315	4.2815	3.87426	4.32714	3.57121	3.28215
11651	0.0771901	0.829985	0.979186	0.70084	-0.215513	0.280867	0.547014	0.422755
11687	-0.177244	0.124491	0.457736	0.422755	0.496419	0.457736	0.722325	0.722325
11691	-1.77636e-15	1	-5.93283	-5.93283	-5.93283	-5.93283	-5.93283	-5.93283
11708	-0.0991758	0.350931	6.95286	6.94407	6.644	6.95048	6.90799	6.98093
11712	-0.486621	0.0790312	2.30381	2.2205	1.83275	2.29667	2.95272	2.56223
11713	-1.77636e-15	1	-5.93283	-5.93283	-5.93283	-5.93283	-5.93283	-5.93283
11725	-0.691587	0.392348	-4.34786	-3.52999	-5.93283	-4.34786	-3.06504	-4.34786
11741	-0.856181	0.232752	-4.10221	-3.52999	-4.34786	-2.39882	-2.67448	-4.34786
11745	-1.77636e-15	1	-5.93283	-5.93283	-5.93283	-5.93283	-5.93283	-5.93283
11748	-1.77636e-15	1	-5.93283	-5.93283	-5.93283	-5.93283	-5.93283	-5.93283
11766	-1.77636e-15	1	-5.93283	-5.93283	-5.93283	-5.93283	-5.93283	-5.93283
11773	0.283974	0.598339	-1.11686	-2.71465	-1.77268	-1.74594	-2.67448	-1.9691
11780	-1.77636e-15	1	-5.93283	-5.93283	-5.93283	-5.93283	-5.93283	-5.93283
11797	-0.540039	0.203583	-0.940469	-1.01741	-1.61891	-1.31744	-0.288586	-0.365862
11804	-0.795257	0.377452	-4.34786	-5.93283	-5.93283	-5.93283	-4.34786	-3.52999
11806	-1.77636e-15	1	-5.93283	-5.93283	-5.93283	-5.93283	-5.93283	-5.93283
11822	-0.134137	0.683252	3.05451	2.65237	1.89592	2.63093	2.62463	2.7676
11823	0.464322	0.0315758	6.13732	6.00309	5.64384	5.5873	5.50348	5.30431
11831	0.0124113	0.96747	-0.231707	-0.347826	-0.102478	-0.798163	0.277617	-0.231707
11841	-0.519106	0.353098	-5.93283	-5.93283	-5.93283	-4.34786	-5.93283	-5.93283
11856	-1.77636e-15	1	-5.93283	-5.93283	-5.93283	-5.93283	-5.93283	-5.93283
11875	-0.380453	0.00774729	0.901672	0.901672	1.06432	1.46445	1.28893	1.25679
11877	1.20393	0.181465	-4.34786	-2.71465	-3.06504	-5.93283	-4.34786	-3.52999
11897	-1.77636e-15	1	-5.93283	-5.93283	-5.93283	-5.93283	-5.93283	-5.93283
11907	-0.00380717	0.995805	-5.93283	-5.93283	-4.34786	-5.93283	-5.93283	-4.34786
11962	0.303848	0.746768	-3.52999	-5.93283	-5.93283	-4.34786	-5.93283	-5.93283
11968	-1.77636e-15	1	-5.93283	-5.93283	-5.93283	-5.93283	-5.93283	-5.93283
11995	-0.0373277	0.839388	-0.0846652	-0.288586	-0.51412	-0.11745	-0.51412	-0.11745
12003	-0.11536	0.834612	-3.52999	-3.52999	-3.52999	-3.52999	-2.39882	-4.34786
12007	0.0165701	0.981825	-4.34786	-5.93283	-5.93283	-5.93283	-5.93283	-4.34786
12029	-1.08731	5.86999e-05	2.16943	2.43766	2.38409	3.36318	3.39543	3.48824
12051	-1.77636e-15	1	-5.93283	-5.93283	-5.93283	-5.93283	-5.93283	-5.93283
12059	0.306443	0.0380117	3.07734	2.92271	2.97343	2.88026	2.50808	2.67504
12071	1.20536	0.286744	-5.93283	-3.52999	-3.06504	-5.93283	-5.93283	-4.34786
12111	-0.120255	0.43303	2.70874	2.85066	3.18034	3.06996	2.91441	3.11298
12113	0.04311	0.660124	3.24861	3.12654	2.96787	3.15503	3.07955	2.98359
12123	-0.0506247	0.667737	2.17621	2.2054	1.97485	2.2107	1.9992	2.30535
12124	-0.0204228	0.938629	-0.889298	-0.679917	-1.33932	-0.631852	-1.27889	-0.912408
12178	-0.335116	0.277709	6.38604	6.01915	6.64124	7.15845	6.55938	6.33731
12318	0.118649	0.654004	2.38409	2.30381	2.12518	1.96895	1.81753	2.68117
12328	-3.55271e-15	1	13.2656	13.2656	13.2656	13.2656	13.2656	13.2656
12350	-0.456356	0.359763	-1.50634	-1.69245	-1.22376	-1.91494	-0.360852	-0.825673
12369	-0.0766501	0.555227	6.85203	6.93974	6.78442	6.68695	7.04252	7.07526
12403	-0.0554361	0.830633	-0.288586	-0.75805	-0.912408	-0.231707	-0.852158	-0.666555
12410	0.102198	0.278736	6.23029	6.23637	6.49106	6.22147	6.17577	6.25337
12425	0.0801966	0.539732	4.85427	4.87201	5.10818	5.00453	4.66302	4.92884
12433	-0.0730184	0.559148	5.68964	5.57717	5.46728	5.43401	5.7814	5.73668
12505	0.254322	0.298009	2.11427	2.32419	1.92453	1.50074	1.8482	2.24559
12516	-2.03487	0.00754136	-5.93283	-5.93283	-4.34786	-3.52999	-3.52999	-3.06504
12616	0.372155	0.55608	-2.77508	-2.03791	-1.48227	-1.74594	-2.16788	-3.52999
12627	-0.0270309	0.901046	5.8574	5.76754	5.43436	6.07403	5.64049	5.43254
12693	0.175231	0.563739	4.70349	4.29439	3.89354	4.53974	3.96946	3.87319
12735	-0.149401	0.103286	3.94617	3.85554	3.79757	3.90454	4.02273	4.12122
12755	0.22822	0.340617	7.5694	7.38532	6.8613	7.21323	7.08139	6.83838
12849	-1.34545	0.115131	-5.93283	-5.93283	-5.93283	-5.93283	-3.52999	-4.34786
12928	0.283028	0.375825	10.2267	9.90071	9.55236	10.084	9.55236	9.19698
12975	-0.253176	0.783111	-5.93283	-5.93283	-3.52999	-4.34786	-5.93283	-4.34786
12981	-0.0389027	0.889179	7.31173	7.75424	7.9771	7.28066	7.92096	7.95489
13022	-1.77636e-15	1	-5.93283	-5.93283	-5.93283	-5.93283	-5.93283	-5.93283
13025	-1.77636e-15	1	-5.93283	-5.93283	-5.93283	-5.93283	-5.93283	-5.93283
13031	-0.149281	0.249317	6.2611	6.48794	6.63364	6.4944	6.63269	6.70056
13041	0.346642	0.275688	-0.700352	-1.59485	-0.912408	-1.20371	-1.41915	-1.59485
13053	1.45028	0.176118	-4.34786	-2.71465	-3.52999	-3.06504	-5.93283	-5.93283
13063	0.0239023	0.89657	3.17164	3.08377	3.19588	3.49789	3.02049	2.86796
13116	-0.0222008	0.886417	3.35015	3.00311	2.87549	3.22849	2.9796	3.09922
13132	-0.0119898	0.865068	6.38057	6.42339	6.50352	6.41086	6.36898	6.5635
13145	0.0133888	0.926556	3.82047	3.81228	3.84435	3.67897	3.64693	4.11276
13163	0.478373	0.0909544	4.98817	4.88225	5.08599	4.01985	4.86447	4.62686
13175	-0.0152062	0.885932	7.73658	7.77152	7.68616	7.78536	7.90743	7.54662
13177	-0.0659624	0.804894	5.54093	6.17099	6.29736	5.76395	6.16859	6.26339
13252	-0.000763861	0.987383	8.00025	7.99366	7.89516	7.93801	7.93499	8.01859
13388	-0.219994	0.109551	10.7917	10.5593	10.4106	10.7021	10.8443	10.8758
13476	-0.0632312	0.427694	1.11922	1.19313	1.33233	1.28576	1.24357	1.30189
13482	-0.114549	0.539065	4.96638	4.81207	5.32916	5.24175	4.92495	5.28762
13512	-0.695818	0.00115979	1.04146	1.17592	1.12828	1.96895	1.81753	1.64497
13531	-0.204981	0.0892331	4.68993	4.4749	4.44636	4.62969	4.73181	4.86773
13541	0.269647	0.078234	-0.459353	-0.679917	-0.447901	-0.631852	-0.924433	-0.825673
13592	-0.603607	0.0724052	1.06432	1.19313	1.96091	2.2054	1.83275	1.98405
13658	-0.176357	0.00937031	11.1603	11.1427	11.1247	11.295	11.3954	11.2662
13688	0.319244	0.223374	2.67504	2.60418	2.66759	1.92453	2.2506	2.81178
13734	1.25344	0.0907194	0.625553	0.722325	-0.912408	-1.20371	-1.41915	-0.666555
13739	-0.146823	0.52499	0.778739	0.975892	0.854587	0.69129	0.901672	1.45006
13776	0.0628508	0.721455	6.13066	6.34704	6.2841	5.86118	6.44405	6.26165
13830	-0.109401	0.493758	6.74539	6.97485	6.89934	6.68695	7.10804	7.15036
13966	-0.0825889	0.457706	7.15553	6.97119	6.96205	7.29459	7.03396	7.00953
14051	-0.0188012	0.932851	6.28483	5.84446	5.48018	5.87461	5.87758	5.92128
14171	0.442592	0.249828	1.24682	1.66135	2.19444	1.50074	1.50074	0.75081
14239	-0.0647057	0.10631	7.40092	7.46898	7.41517	7.49247	7.46991	7.51673
14258	0.281286	0.698512	-3.06504	-3.52999	-2.39882	-4.34786	-3.52999	-1.9691
14278	-0.0251466	0.837752	11.4146	11.477	11.8038	11.6702	11.5501	11.5501
14402	-0.202916	0.322099	0.073594	-0.126357	-0.161345	0.457736	-0.161345	0.125305
14404	0.125265	0.585793	8.29033	7.85104	7.73443	8.16534	7.63239	7.70518
14473	-0.297098	0.000366783	4.87763	4.82867	4.8066	5.13854	5.11745	5.14945
14619	-0.0109476	0.870937	5.78533	5.65116	5.85526	5.8235	5.73646	5.76609
14700	-0.167466	0.285971	6.75454	6.73275	6.63205	7.17158	6.71449	6.73785
14719	0.490479	0.0123094	-0.583554	-0.596212	-0.720788	-1.31744	-1.14244	-0.912408
14757	0.247259	0.705088	-2.62623	-1.44103	-2.16788	-3.52999	-1.91494	-1.59485
14775	0.0285743	0.755524	6.42367	6.24681	6.12517	6.23367	6.29247	6.18534
14782	-0.180001	0.509189	-1.74594	-1.22376	-1.11686	-1.31744	-1.41915	-0.825673
14808	0.233959	0.256991	3.43894	3.32692	3.27248	3.40354	2.74094	3.20525
14849	1.18588	0.342831	-0.459353	0.514175	2.58192	-1.59485	1.03942	-0.51412
14851	0.486437	0.602094	-1.41915	-0.387249	1.35532	-1.20371	0.188128	-1.01741
14866	1.89324	0.0159994	-3.52999	-2.71465	-2.71465	-4.34786	-5.93283	-4.34786
14917	-0.0551373	0.553686	0.703512	0.823481	0.979186	0.906125	0.87033	0.889521
14936	0.0583961	0.873137	1.21372	1.0304	0.20088	0.660042	0.451871	1.18625
14952	-0.111654	0.122455	3.1239	3.12654	3.10943	3.12654	3.25109	3.31589
14969	0.125838	0.904105	-5.93283	-4.34786	-3.06504	-5.93283	-4.34786	-3.52999
15000	0.147325	0.316619	10.727	10.9694	11.0147	10.5273	10.8758	10.8644
15029	0.0475948	0.685825	5.9152	5.77719	6.01666	5.87061	5.67992	6.01858
15131	-0.574002	0.316305	-2.39882	-2.71465	-2.71465	-3.06504	-1.27889	-1.79456
15133	-0.273662	0.0230506	2.86482	3.09922	2.95034	3.3485	3.18034	3.20525
15157	-0.0477065	0.533859	6.72208	6.62834	6.75628	6.86796	6.64751	6.73566
15193	-0.163102	0.125461	1.69297	1.74379	1.65876	1.75411	2.02434	1.79992
15325	0.0352008	0.798714	6.03638	5.75034	5.63698	5.62828	5.79738	5.89553
15353	0.0216647	0.888282	5.03024	4.82537	5.01349	5.18218	4.67588	4.95413
15355	-0.136361	0.313684	-0.459353	-0.825673	-0.51412	-0.503189	-0.439312	-0.439312
15370	-0.0488349	0.945688	-2.39882	-1.69245	-2.39882	-3.52999	-1.74594	-1.11686
15418	-0.552091	0.256272	-2.62623	-2.71465	-1.33932	-1.31744	-1.74594	-1.9691
15442	-0.0801034	0.50396	6.33049	6.53065	6.57135	6.37253	6.60854	6.68891
15565	-0.0660385	0.68227	3.23053	3.09922	2.75234	3.09922	2.95272	3.23709
15655	-0.13407	0.356805	3.62808	3.52066	3.18508	3.67283	3.57121	3.49789
15669	-0.079869	0.673997	6.00432	5.77076	5.99998	6.36744	5.8643	5.78855
15690	-0.386327	0.426864	-1.01741	-2.43323	-1.01741	-1.01741	-1.41915	-0.825673
15710	-0.360362	0.182992	0.75081	1.1446	0.280867	0.931214	1.15841	1.16195
15716	0.183356	0.575683	-0.0603286	-0.447901	-0.215513	-0.351834	0.0869736	-1.01741
15744	0.0722289	0.0871407	5.8099	5.76395	5.84044	5.71321	5.74532	5.73894
15785	0.398176	0.0500486	0.979186	1.1446	1.33233	0.889521	0.87033	0.491882
15897	-0.543008	0.044193	-2.62623	-2.71465	-3.06504	-2.39882	-2.39882	-1.9691
15930	-0.565148	0.248594	2.26053	2.10124	2.77091	3.79386	2.44678	2.60418
15951	-0.379831	0.286173	3.10193	2.17621	1.9992	2.88026	2.93491	2.62463
16006	-0.0788333	0.507212	5.07592	4.94964	4.84947	5.2358	4.964	4.91709
16024	-0.169655	0.0398259	5.22886	5.0644	5.22493	5.39109	5.29167	5.34693
16050	-0.0620698	0.807984	2.11427	2.26053	2.09066	1.75411	2.65885	2.2191
16161	0.124928	0.242044	3.44182	3.54052	3.71638	3.53442	3.34123	3.44772
16167	0.0259123	0.738741	5.73955	5.65886	5.68056	5.62212	5.57106	5.81004
16171	-0.00156901	0.993817	3.04734	2.96837	3.00311	2.583	3.23709	3.19543
16191	0.464382	0.0613951	-0.825673	-0.912408	-1.33932	-1.59485	-1.27889	-1.59485
16202	0.376435	0.15627	6.42895	6.61627	6.26339	5.59809	6.26839	6.30729
16218	-0.357297	0.0245467	5.42385	5.48652	5.46728	6.05448	5.70418	5.69317
16405	0.332601	0.142884	6.90108	6.82089	6.71899	6.80756	6.53671	6.1005
16427	-1.58773	0.0438386	-4.10221	-2.20805	-4.34786	-2.39882	-1.74594	-1.79456
16430	-0.140599	0.51803	1.8482	1.45006	2.03698	1.94554	1.6737	2.1491
16460	-0.371192	0.0643806	-0.231707	-0.288586	-0.102478	0.0355018	0.451871	-0.0116095
16486	0.0961532	0.591403	3.74083	3.58495	3.61989	3.89377	3.28616	3.48824
16487	-2.30255	0.0172249	-2.39882	-4.34786	-4.34786	-1.44103	-0.743902	-1.9691
16494	0.344423	0.237164	0.480565	0.229208	0.75081	0.625553	-0.0116095	-0.169933
16501	-0.114232	0.517559	4.60989	4.22121	4.23353	4.70181	4.44831	4.26626
16514	-0.588659	0.341167	-1.74594	-2.20805	-0.102478	-0.896372	-0.51412	-0.912408
16520	0.420302	0.105126	-2.62623	-3.06504	-2.71465	-3.06504	-3.06504	-3.52999
16560	-0.0192162	0.863269	4.00615	3.81228	3.70631	4.00225	3.77521	3.81228
16611	-0.170779	0.306606	5.20386	4.9001	4.94876	5.29349	4.92726	5.35344
16635	-0.0553583	0.59812	8.53699	8.47024	8.34071	8.67827	8.45554	8.3811
16673	-0.126459	0.573845	5.1597	5.0454	5.36171	5.74295	5.08912	5.12031
16918	0.270902	0.300378	0.662547	0.514175	0.356985	-0.179953	0.669059	0.215265
16932	0.390435	0.0338469	5.00527	4.88225	4.98116	4.80392	4.59071	4.30564
16956	-0.021096	0.867783	5.8509	5.81315	5.76622	6.09017	5.69132	5.71637
16982	0.163274	0.385415	6.76288	6.43477	6.12517	6.23194	6.25704	6.34769
16992	0.0251783	0.822403	7.00548	6.94152	6.92137	6.74226	7.13132	6.91796
17078	0.733948	0.0152658	3.27013	3.06259	3.34508	2.85175	2.51741	2.11225
17170	-0.435289	0.00581779	5.14992	5.26963	5.33518	5.52691	5.8107	5.71796
17178	-0.280971	0.420346	5.96691	5.40622	5.5686	6.54427	5.73428	5.51935
17182	-0.545321	0.06356	-1.74594	-2.03791	-2.39882	-1.31744	-1.41915	-1.79456
17224	0.145805	0.183801	4.92654	4.70378	4.82096	4.79258	4.5298	4.69769
17265	-0.146158	0.0920787	7.28805	7.20691	7.04294	7.3466	7.30292	7.32753
17302	0.326147	0.302612	6.2611	5.71946	5.31408	5.15122	5.55487	5.61591
17331	-0.900109	0.0120348	-1.20371	-0.447901	-1.22376	-0.11745	0.0869736	-0.169933
17355	0.936557	0.00557498	0.319432	0.229208	-0.215513	-0.798163	-0.656535	-1.01741
17379	0.520304	0.354899	-5.93283	-4.34786	-5.93283	-5.93283	-5.93283	-5.93283
17410	0.00195956	0.981933	5.64311	5.68885	5.91506	5.77363	5.70588	5.76045
17414	-0.299091	0.00711749	3.36982	3.4583	3.31358	3.59122	3.67641	3.77008
17521	0.027403	0.744043	5.75156	5.82549	5.99727	5.79189	5.78769	5.91096
17527	0.232159	0.126563	7.32804	7.60328	7.54329	7.03952	7.35064	7.38639
17579	-0.186998	0.0550209	8.05014	7.95623	7.83759	8.21362	8.14795	8.04396
17661	-0.129693	0.753728	6.64896	7.27757	7.66613	6.72811	7.44024	7.809
17702	-0.473694	0.237001	-1.59485	-1.11686	-0.720788	-0.707426	-1.14244	-0.169933
17704	0.0234117	0.974284	-4.34786	-5.93283	-5.93283	-4.34786	-5.93283	-5.93283
17731	0.0966355	0.428101	8.13956	7.96203	8.146	8.18598	7.82528	7.94762
17736	0.0233525	0.929552	4.11462	3.71947	3.7402	4.33178	3.63763	3.55022
17805	0.00906266	0.915036	6.42122	6.26339	6.23637	6.20108	6.2776	6.41631
17842	-0.595776	8.32061e-06	6.68695	6.7223	6.69058	7.33117	7.26604	7.28999
17900	0.62805	0.105588	-0.700352	-0.189202	-0.825673	-0.896372	-0.924433	-1.79456
17901	0.243856	0.441214	4.34444	3.89885	3.56656	4.14212	3.58495	3.3682
17904	0.147236	0.623111	5.83874	5.42412	5.20002	5.83244	5.00552	5.19906
17906	-0.277747	0.256389	7.38943	7.05559	6.59365	7.41517	7.19606	7.26356
17916	0.647801	0.0146353	4.68569	4.33599	4.48076	4.16979	3.80421	3.59377
17937	-0.28502	0.0200091	3.73665	3.62021	3.68175	4.10464	3.96498	3.82704
17996	-0.503531	0.230597	-1.88484	-2.43323	-2.39882	-1.31744	-2.39882	-1.44103
18025	-0.0458742	0.81578	1.95681	1.98405	2.19444	2.2784	2.27907	1.70957
18029	-0.535344	0.0619552	-0.126357	0.457736	0.0811087	0.393576	0.627626	0.977539
18037	0.103089	0.282215	1.25679	1.5174	1.38858	1.26938	1.33666	1.23909
18043	-0.0454188	0.766201	3.78132	3.48083	3.44034	3.84325	3.48178	3.52443
18106	-0.540465	0.00583046	2.26053	1.97096	2.06805	2.46452	2.7182	2.74094
18114	0.0895302	0.829869	2.43452	3.34041	3.57517	2.49143	3.28018	3.27894
18219	-0.110873	0.711378	5.51832	6.0787	6.16726	5.55127	6.25532	6.27744
18223	0.218571	0.27351	6.93888	6.80853	6.84938	7.00026	6.33627	6.60854
18247	-0.0243691	0.67071	6.68612	6.60405	6.59122	6.58799	6.62992	6.73712
18299	0.0634239	0.620527	5.33034	5.1965	4.96237	5.16636	5.1799	4.95549
18319	1.04505	0.0745517	-4.34786	-4.34786	-4.34786	-5.93283	-4.34786	-5.93283
18330	-0.67422	0.612404	-4.34786	-3.06504	-5.93283	-5.93283	-2.39882	-3.06504
18337	-0.176558	0.161876	2.46296	2.23555	2.24559	2.66237	2.39784	2.42364
18390	-0.310305	0.595434	-3.06504	-2.43323	-1.9691	-1.31744	-2.16788	-3.06504
18398	-0.0156027	0.903922	3.66508	3.24951	3.36982	3.38564	3.53024	3.42013
18416	-0.109224	0.698278	4.13236	4.04396	4.02526	4.75808	3.96946	3.81228
18432	-0.233595	0.156894	-0.459353	-0.387249	-0.583554	-0.288586	-0.0116095	-0.439312
18555	-1.77636e-15	1	-5.93283	-5.93283	-5.93283	-5.93283	-5.93283	-5.93283
18594	2.40267	0.007785	-3.06504	-2.43323	-3.52999	-4.34786	-5.93283	-5.93283
18632	0.00336502	0.985213	2.02534	2.2054	1.68455	1.98892	2.14301	1.77001
18634	0.545897	0.464273	-4.34786	-5.93283	-4.34786	-4.34786	-5.93283	-5.93283
18677	-0.10256	0.925764	-3.06504	-4.34786	-5.93283	-3.52999	-3.52999	-5.93283
18684	0.019224	0.818631	6.34435	6.26839	6.20727	6.39739	6.14803	6.21967
18725	0.0355844	0.837816	6.2611	6.00097	5.68304	6.06308	5.82787	5.95448
18819	-0.226604	0.304615	0.801418	0.457736	0.0811087	0.625553	0.783276	0.625553
18952	0.0561468	0.632525	6.83687	6.60717	6.49884	6.55654	6.50094	6.71928
18975	0.45536	0.114765	3.46403	2.96227	3.45368	2.95425	2.44678	3.12842
18995	0.215125	0.601996	-0.656535	-1.59485	-0.51412	-1.31744	-0.656535	-1.44103
19005	0.102626	0.808297	-1.88484	-0.825673	-1.01741	-1.01741	-1.91494	-1.11686
19014	-0.3681	0.196881	-1.31744	-1.85475	-1.77268	-1.31744	-0.924433	-1.59485
19056	-0.362586	0.121854	-0.940469	-0.596212	-0.583554	-0.631852	-0.360852	-0.0603286
19060	-0.192068	0.547404	1.73082	2.2205	2.84974	2.41541	2.56996	2.36897
19074	-0.48112	0.0363802	6.53751	6.14177	6.31029	7.10373	6.6505	6.68333
19114	-0.308919	0.122312	2.73979	2.80391	2.90061	3.4583	3.03811	2.87749
19117	-0.152089	0.793252	-2.39882	-2.71465	-2.39882	-3.52999	-1.59485	-1.9691
19140	0.0869855	0.650619	1.30822	1.04922	1.54959	1.39339	0.963218	1.30189
19155	-0.060567	0.682932	6.24128	5.93418	5.73112	6.08165	6.04749	5.96403
19161	0.0133469	0.850921	4.58215	4.62718	4.47331	4.45006	4.6192	4.57164
19239	0.0182976	0.928279	6.85539	6.58799	6.356	6.89565	6.39992	6.45412
19243	-0.307375	0.0852004	2.56085	2.2205	2.32419	2.79721	2.79055	2.44604
19263	0.0466054	0.804304	6.37722	6.40751	5.81357	6.21763	6.11634	6.12763
19303	-0.0575767	0.85594	-2.62623	-2.03791	-2.39882	-2.71465	-2.39882	-1.79456
19365	-0.421732	0.238329	1.19313	0.262461	0.979186	1.65422	1.10103	0.977539
19399	-0.791951	0.0558521	-1.41915	-1.33932	-0.347826	-0.0116095	-0.439312	-0.288586
19406	-0.00787806	0.973519	0.429254	0.393576	1.12828	0.75081	0.627626	0.588754
19423	0.035411	0.927578	1.10103	1.0304	0.125305	0.234551	1.12977	0.778739
19442	0.0690578	0.810917	6.75525	6.27517	6.0645	6.72253	6.21242	5.96066
19445	-0.212757	0.809071	-2.77508	-2.71465	-4.34786	-1.74594	-3.06504	-4.34786
19462	-0.46288	0.157986	-1.9691	-2.20805	-2.39882	-1.74594	-1.27889	-2.16788
19467	0.139932	0.852545	-4.10221	-2.71465	-2.71465	-4.34786	-2.16788	-3.52999
19524	0.123471	0.608408	3.82047	3.68818	3.09634	3.23627	3.60495	3.39543
19525	-0.0910762	0.14001	7.88911	7.77431	7.92686	7.96327	7.91162	7.98895
19554	0.145697	0.235131	7.00026	6.97569	6.67729	6.84445	6.67487	6.69837
19562	0.605514	0.434213	-0.376318	-2.20805	-0.825673	-2.39882	-0.656535	-2.16788
19570	-0.205377	0.291044	3.61603	3.48083	3.28951	3.34243	3.87623	3.78103
19572	-0.407653	0.133319	0.102245	0.229208	-0.215513	0.0811087	0.783276	0.457736
19612	-0.188544	0.211152	2.46296	2.13477	2.28947	2.65566	2.30128	2.50922
19619	-0.368327	0.140762	4.31495	4.23932	4.4623	5.13595	4.40292	4.59101
19652	0.0136139	0.870517	4.12431	4.27739	4.23501	4.08301	4.19071	4.31888
19673	-0.062606	0.306114	2.3924	2.31469	2.37053	2.40215	2.36743	2.49831
19676	0.055064	0.281203	6.81064	6.83807	6.80756	6.71914	6.72496	6.84699
19690	-0.737707	0.0122212	-1.50634	-1.33932	-1.48227	-0.351834	-0.924433	-0.825673
19698	0.195866	0.870189	-3.06504	-5.93283	-5.93283	-3.52999	-5.93283	-5.93283
19699	-0.191705	0.234164	-1.11686	-1.11686	-1.22376	-0.707426	-1.14244	-1.01741
19737	-1.32673	0.118123	-5.93283	-5.93283	-5.93283	-3.52999	-4.34786	-5.93283
19751	-0.197468	0.537004	3.19768	2.86796	2.52571	3.59122	2.88596	2.72598
19752	-0.288094	0.0742541	1.81753	1.78623	1.48387	1.98892	2.12668	1.83712
19763	-1.63437	0.173721	-2.77508	-5.93283	-2.16788	-2.71465	-1.27889	-1.9691
19773	0.0977968	0.41034	5.71796	5.6474	5.79247	5.44478	5.59343	5.82549
19801	-0.374452	0.049715	5.89685	5.85439	6.19912	6.59004	6.25296	6.23155
19805	-0.171565	0.167728	4.54593	4.69921	4.66538	4.63162	4.79878	4.99118
19814	-0.60637	0.282993	-2.16788	-1.59485	-2.71465	-1.01741	-2.39882	-1.20371
19819	0.0440918	0.921453	0.684412	0.823481	0.166011	-0.351834	1.03942	0.823481
19838	0.336667	0.223284	-0.940469	-1.01741	-0.583554	-1.11686	-1.59485	-0.825673
19926	0.447515	0.565386	-4.10221	-3.06504	-1.9691	-3.52999	-2.67448	-4.34786
19989	-0.337871	0.116778	2.49143	2.2054	2.19444	2.30381	2.77688	2.82439
19992	0.0537528	0.262682	4.18857	4.19698	4.09965	4.13213	4.10189	4.09085
20012	-0.0768781	0.751704	6.64321	6.93356	6.9627	6.45784	7.11762	7.19059
20028	0.171523	0.599973	-0.169933	0.181055	0.429254	-0.351834	-0.288586	0.552479
20107	-0.134413	0.666129	6.48367	7.0005	6.60484	6.31637	7.30117	6.86826
20118	0.0449899	0.647359	5.57651	5.4466	5.51402	5.32936	5.43254	5.64121
20135	-0.00215584	0.975842	6.61384	6.42792	6.41669	6.48587	6.44179	6.53907
20168	0.00113037	0.995448	4.11192	3.83218	3.62458	4.15208	3.77639	3.64787
20174	0.0176047	0.970034	0.801418	0.0355018	0.234551	0.931214	0.627626	-0.51412
20183	0.0421914	0.49596	4.99947	5.07872	5.08449	5.11003	4.95527	4.97121
20235	-0.0736146	0.370181	3.77836	3.6417	3.69311	3.86579	3.81712	3.65336
20303	0.428592	0.142501	1.19313	1.23403	1.19313	1.0102	1.10103	0.215265
20333	-0.408872	0.130161	5.26913	4.89295	5.27416	5.96066	5.47509	5.23432
20372	-0.706264	0.0737572	0.138545	-0.0668276	-0.288586	1.10491	0.0869736	0.75081
20377	0.309154	0.439628	0.594479	-0.0668276	-0.656535	-0.439312	-0.51412	-0.0603286
20378	-0.34943	0.278043	-0.288586	-0.387249	-1.11686	-0.288586	-0.51412	0.0869736
20401	-0.0216456	0.79127	6.86661	6.65088	6.70432	6.801	6.66466	6.82296
20418	-0.0296577	0.925193	3.23053	3.29751	2.84974	3.58562	3.31358	2.57129
20467	-0.737877	0.0377312	-0.439312	-1.33932	-1.33932	-0.288586	-0.288586	-0.288586
20539	0.288712	0.0343099	0.356985	0.138545	0.166011	0.0355018	-0.0603286	-0.169933
20572	-1.28472	0.162781	-4.34786	-5.93283	-3.06504	-2.39882	-3.52999	-3.52999
20584	-0.175312	0.364857	4.90382	4.91405	4.42143	4.71148	5.01375	5.04018
20588	0.181239	0.454819	0.625553	0.75081	1.21372	1.0102	0.516971	0.519767
20650	-0.166265	0.479271	4.93454	4.91147	5.41844	5.52276	4.92937	5.31496
20712	-0.0962851	0.789942	6.35828	7.0126	6.79554	6.2062	7.32804	6.91277
20735	0.036617	0.828677	5.40713	5.19845	4.86692	5.20994	5.18899	4.96867
20750	-0.0977849	0.659653	4.91629	5.33128	5.47208	5.052	5.34987	5.60173
20764	-0.0996173	0.429035	8.68189	8.40974	8.26493	8.61251	8.51727	8.52702
20799	-0.0363287	0.756874	2.43452	2.26859	2.39166	2.19349	2.54461	2.46223
20810	-0.704208	0.0232577	-1.31744	-0.912408	-1.61891	-0.631852	-0.360852	-0.75805
20814	-0.127366	0.594418	-2.77508	-3.06504	-2.71465	-2.71465	-2.39882	-3.06504
20819	-0.345471	0.0792582	0.926842	0.975892	1.14753	1.24682	1.17951	1.66005
20833	0.215763	0.395135	4.87853	4.55483	4.66538	4.94915	4.377	4.13569
20884	-0.229929	0.762361	1.77913	2.30381	3.52894	1.54436	3.20282	3.50518
20889	0.20879	0.755179	-1.74594	-1.11686	-1.48227	-3.06504	-1.14244	-0.825673
20899	-0.36508	0.193808	1.04146	0.181055	0.429254	0.840973	0.843285	1.09178
20915	0.15059	0.603366	4.66368	4.45079	5.14655	4.22627	4.58886	4.98967
20917	0.196899	0.760303	-1.74594	-2.20805	-2.16788	-1.91494	-1.27889	-3.52999
20932	0.497131	0.0513841	5.67079	5.27395	5.13217	5.11207	4.85198	4.63033
20976	-0.793471	0.380659	-5.93283	-5.93283	-4.34786	-4.34786	-5.93283	-3.52999
20983	-0.086615	0.581681	6.87146	6.70496	6.59582	7.05644	6.80638	6.57135
21005	-0.313887	0.0424535	1.55242	1.43584	1.17448	1.79178	1.69297	1.62846
21011	-0.0110838	0.946684	1.25679	1.40659	1.38858	1.69073	1.21372	1.18625
21022	-0.104511	0.294891	4.99947	4.87749	4.69556	5.01142	4.90065	4.97859
21039	0.121322	0.394744	2.64751	3.04683	3.02519	2.6946	2.79957	2.85175
21056	-0.029166	0.921917	4.53426	5.07475	5.00701	4.37144	5.10887	5.20734
21077	0.00258128	0.984942	4.44433	4.08362	4.07215	4.30641	4.07308	4.22247
21119	-0.147052	0.473787	2.47303	2.08676	1.77001	2.26859	2.32289	2.1918
21128	-0.299733	0.0261464	6.81217	6.78144	7.02876	7.08139	7.13502	7.30473
21162	-0.201387	0.408094	1.6737	1.21372	1.17448	1.87138	1.24357	1.58032
21163	0.0927199	0.686253	0.801418	1.00305	0.75081	1.19313	0.669059	0.422755
21172	0.10113	0.690489	0.102245	-0.126357	-0.288586	-0.0116095	-0.656535	0.0869736
21220	0.115773	0.705796	0.181055	0.287737	0.319432	-0.439312	0.669059	0.173768
21230	-0.388236	0.392668	-2.39882	-1.59485	-1.33932	-1.44103	-1.91494	-0.825673
21236	0.563834	0.0722698	0.0355018	-0.447901	0.280867	-0.351834	-0.852158	-0.596212
21237	-1.43535	0.107212	-4.34786	-4.34786	-5.93283	-3.52999	-4.34786	-2.39882
21281	-0.313105	0.0883543	0.662547	0.332611	0.464064	0.86369	0.576444	0.977539
21292	0.0414848	0.798742	6.2244	5.95662	5.90158	6.19018	6.04544	5.72655
21326	0.107773	0.431132	5.43054	5.15872	4.99835	5.17378	5.09318	5.00307
21355	0.57846	0.657662	-3.06504	-4.34786	-1.77268	-5.93283	-3.06504	-1.9691
21360	-1.37742	0.00502921	-0.656535	-1.01741	-1.48227	0.660042	0.356985	-0.0116095
21376	0.0247395	0.948399	6.02719	5.55929	5.38073	6.28354	5.56622	5.0561
21384	0.137071	0.646105	3.37575	3.166	3.39543	3.61989	2.59767	3.32652
21392	-0.167353	0.282032	-1.20371	-1.44103	-1.48227	-1.31744	-1.27889	-1.01741
21401	-0.0891383	0.404478	9.37362	9.30914	9.05765	9.2928	9.2928	9.42292
21442	-0.239436	0.425384	4.39625	4.91147	5.07168	4.58499	5.16137	5.33623
21475	0.0386425	0.806863	7.63834	7.40146	7.1165	7.45589	7.35493	7.23095
21499	0.0539845	0.936683	-1.59485	-1.01741	0.356985	-0.231707	-1.59485	-0.596212
21506	-0.656518	0.149895	-2.62623	-1.33932	-1.9691	-1.11686	-1.74594	-1.11686
21512	0.0804523	0.663791	0.801418	0.393576	0.280867	0.588754	0.277617	0.393576
21565	0.1268	0.592903	6.74796	6.76604	7.15014	6.42009	7.13715	6.72208
21613	-0.149972	0.152721	6.37398	6.24075	6.23449	6.54556	6.27199	6.48464
21681	-0.0302814	0.811629	6.26563	6.61459	6.56161	6.38895	6.64124	6.49841
21706	-0.64186	0.532606	3.08001	3.59226	5.72234	3.51486	4.8372	5.93123
21714	-0.12507	0.520436	4.01406	3.77578	3.45368	3.65486	4.03637	3.92955
21736	0.223503	0.129774	3.74852	3.53644	3.68175	3.67094	3.31666	3.31589
21744	-0.288172	0.265328	2.23555	2.12593	1.46445	2.11225	2.39166	2.1918
21769	0.462528	0.136511	-0.889298	-0.912408	-0.825673	-1.91494	-0.924433	-1.20371
21831	-0.82557	0.0010561	-0.75805	-0.387249	-0.720788	0.195415	0.138545	0.26914
21834	-0.0275246	0.897415	3.24165	2.91855	3.20282	3.55055	2.93902	2.96837
21838	0.239026	0.139511	0.722325	0.975892	0.825934	0.823481	0.399741	0.588754
21850	-0.0826879	0.756227	4.31023	4.85809	5.14266	4.59306	4.91405	5.0378
21854	-0.0989136	0.0605588	9.30914	9.33038	9.2928	9.46061	9.4277	9.34075
21866	-0.223868	0.147901	2.14112	2.23555	1.89592	2.50922	2.23555	2.2054
21886	-0.0979912	0.541837	0.519767	0.514175	0.588754	0.350819	0.669059	0.889521
21906	0.0119419	0.944171	3.40942	3.42943	3.71638	3.32841	3.3909	3.79787
21954	0.189361	0.229405	2.72477	2.583	2.86652	2.28868	2.70656	2.60418
21965	-0.188851	0.221432	7.54813	7.48977	7.13838	7.43942	7.61388	7.68989
22004	-0.0368397	0.859833	4.23437	3.94617	3.61603	4.22054	3.85799	3.84076
22005	0.00601339	0.976273	3.39543	3.22891	3.11589	3.6056	2.93491	3.19543
22013	0.43094	0.185729	3.13551	3.04061	2.78378	2.84527	2.86541	1.95681
22015	0.636583	0.0737677	2.53101	2.3427	2.14812	1.19313	1.6737	2.24559
22035	0.0999539	0.652645	-0.126357	-0.231707	-0.0603286	0.0811087	-0.656535	-0.11745
35421	0.26768	0.132942	3.04009	3.30442	3.39244	2.80452	3.20957	2.9071
35451	0.128004	0.65513	3.64662	4.07264	4.51353	3.64995	3.99137	4.1929
35515	-1.77636e-15	1	-5.93283	-5.93283	-5.93283	-5.93283	-5.93283	-5.93283
35611	-0.39393	0.00849022	3.90034	3.86714	3.71162	4.11462	4.17369	4.37435
35738	-0.0501983	0.741598	3.74499	3.64995	4.08362	3.72836	3.87426	4.02348
35782	0.152811	0.641971	1.16195	0.926842	1.58437	0.519767	1.48387	1.18625
35973	-1.11013	0.329548	-4.10221	-5.93283	-5.93283	-3.52999	-5.93283	-3.06504
36154	-0.336852	0.232235	0.650502	0.901672	0.0355018	0.75081	1.06432	0.778739
36278	-0.27923	0.368242	-4.34786	-4.34786	-4.34786	-4.34786	-3.52999	-4.34786
36398	5.01474	0.000113661	7.03875	7.9285	6.67246	1.93638	2.208	2.44604
36422	1.09098	0.127992	-3.52999	-3.52999	-3.52999	-3.52999	-5.93283	-4.34786
36622	-1.77636e-15	1	-5.93283	-5.93283	-5.93283	-5.93283	-5.93283	-5.93283
36724	0.0388543	0.902177	-3.52999	-3.06504	-3.06504	-2.71465	-3.52999	-3.52999
36731	0.150749	0.700952	3.37575	3.87925	3.53409	2.77342	4.11192	3.42571
36816	-1.77636e-15	1	-5.93283	-5.93283	-5.93283	-5.93283	-5.93283	-5.93283
37316	0.0234117	0.974284	-4.34786	-5.93283	-5.93283	-4.34786	-5.93283	-5.93283
37483	0.369225	0.000393564	4.20998	4.11462	4.16956	3.81228	3.81962	3.75555
37708	0.0028384	0.990589	3.87623	3.57517	3.3636	4.00757	3.47621	3.33642
38010	0.222191	0.177425	1.21372	1.58714	1.58437	1.37374	1.10103	1.23909
38373	0.0177245	0.877876	4.70228	4.80161	4.65568	4.4968	4.87504	4.72932
38386	-1.77636e-15	1	-5.93283	-5.93283	-5.93283	-5.93283	-5.93283	-5.93283
38570	-0.0465205	0.570389	4.53974	4.55165	4.49609	4.43605	4.58562	4.70422
38734	-0.339921	0.243488	1.51454	1.84586	2.17984	2.07542	1.89592	2.58137
38775	-0.143619	0.130288	2.78941	2.83523	2.89393	3.00311	2.84856	3.09922
39017	-1.77636e-15	1	-5.93283	-5.93283	-5.93283	-5.93283	-5.93283	-5.93283
39707	-1.77636e-15	1	-5.93283	-5.93283	-5.93283	-5.93283	-5.93283	-5.93283
39922	-0.292997	0.160327	1.16195	1.0304	1.30822	1.52524	1.71443	1.1333
40121	-0.188527	0.828787	-4.10221	-5.93283	-4.34786	-5.93283	-4.34786	-3.52999
40469	-1.77636e-15	1	-5.93283	-5.93283	-5.93283	-5.93283	-5.93283	-5.93283
40546	-0.324482	0.104527	2.22544	2.58982	2.83865	2.83309	2.87549	2.9071
40729	-0.0159774	0.825706	6.78286	6.90313	6.65827	6.81295	6.77629	6.80305
40784	-1.77636e-15	1	-5.93283	-5.93283	-5.93283	-5.93283	-5.93283	-5.93283
40806	-0.110245	0.386162	2.12518	2.39014	2.45743	2.32913	2.55877	2.40379
40815	0.520304	0.354899	-5.93283	-4.34786	-5.93283	-5.93283	-5.93283	-5.93283
40927	0.781966	0.0495442	-1.31744	-0.75805	-1.11686	-2.13348	-1.27889	-2.16788
41100	-0.0397974	0.663853	4.72367	4.70378	4.61599	4.89002	4.65769	4.61856
41132	-0.555503	0.0612918	8.17666	7.73279	7.35493	8.48022	8.29937	8.15371
41523	0.537139	0.471878	-4.34786	-4.34786	-5.93283	-5.93283	-5.93283	-4.34786
41615	0.344746	0.0212682	3.34041	3.54351	3.18034	2.96738	3.02049	3.04061
41767	-0.436943	0.649469	-5.93283	-4.34786	-4.34786	-3.06504	-4.34786	-5.93283
42126	-0.4822	0.0828999	-0.583554	-0.825673	-1.01741	-0.707426	-0.210704	-0.0603286
42196	-0.0517759	0.622908	7.1285	7.06854	7.18481	7.37854	7.0485	7.11109
42246	-0.236193	0.47771	-0.205894	0.0355018	-0.656535	0.417946	-0.0116095	-0.51412
42543	0.295564	0.658765	-4.34786	-2.43323	-2.39882	-3.52999	-3.52999	-3.06504
42690	0.146456	0.108827	2.20032	2.0589	2.24559	1.93638	2.08676	2.04095
42815	-0.0146334	0.821656	3.35736	3.33488	3.37575	3.41278	3.4411	3.25716
43060	-0.258437	0.19253	1.6737	2.16483	2.06805	2.0456	2.19857	2.42364
43202	0.102603	0.798336	-1.11686	-1.22376	-1.33932	-0.896372	-0.924433	-2.16788
43221	0.0183281	0.748945	6.50274	6.49159	6.5086	6.37954	6.55938	6.50797
43302	0.149246	0.371443	4.93454	4.97418	5.41322	5.03	4.8372	5.00603
43331	0.0343397	0.969597	-2.16788	-2.43323	-2.71465	-1.31744	-1.74594	-4.34786
43373	-1.77636e-15	1	-5.93283	-5.93283	-5.93283	-5.93283	-5.93283	-5.93283
43411	-1.77636e-15	1	-5.93283	-5.93283	-5.93283	-5.93283	-5.93283	-5.93283
43445	-0.399769	0.136445	4.36768	4.41147	4.6192	5.33334	4.66302	4.60606
43497	-0.805378	0.104091	-1.41915	-1.11686	-1.11686	-1.01741	0.319432	-0.596212
43825	0.141605	0.672261	-0.0603286	0.181055	0.0355018	-0.798163	0.277617	0.215265
44122	0.0985741	0.818755	-0.700352	-1.59485	-1.33932	-1.20371	-0.743902	-1.9691
44184	0.00737061	0.944815	4.85427	4.64904	4.53015	4.59889	4.76924	4.64523
44203	-0.27695	0.765659	-5.93283	-4.34786	-5.93283	-5.93283	-5.93283	-3.52999
44336	-1.77636e-15	1	-5.93283	-5.93283	-5.93283	-5.93283	-5.93283	-5.93283
44411	0.278422	0.433428	-3.06504	-2.20805	-2.39882	-3.06504	-3.06504	-2.39882
44438	0.0519575	0.773067	1.96995	2.0589	2.01663	2.17461	1.6001	2.12593
44575	-1.77636e-15	1	-5.93283	-5.93283	-5.93283	-5.93283	-5.93283	-5.93283
44736	-0.556135	0.00747634	0.703512	0.332611	0.464064	0.931214	1.19313	1.04922
44994	1.34363	0.118505	-3.52999	-4.34786	-5.93283	-5.93283	-5.93283	-5.93283
45093	-0.0572913	0.696624	4.88454	4.87504	4.69769	4.88524	5.10981	4.63178
45158	-0.101305	0.746446	0.722325	1.21372	0.997054	0.489086	1.26803	1.45006
45248	-1.77636e-15	1	-5.93283	-5.93283	-5.93283	-5.93283	-5.93283	-5.93283
45593	-0.466119	0.237378	3.42275	3.62021	3.24361	3.16563	4.29511	4.20934
45882	-0.878447	0.043731	0.0355018	-0.189202	0.901672	0.788085	1.35832	1.21372
45884	0.0175243	0.814127	4.98967	4.97247	5.09318	4.92149	4.9575	5.12324
46087	-0.530409	0.252771	-3.06504	-4.34786	-3.52999	-3.06504	-3.52999	-2.71465
46247	-1.77636e-15	1	-5.93283	-5.93283	-5.93283	-5.93283	-5.93283	-5.93283
46264	0.291911	0.243879	0.215265	0.181055	0.356985	-0.503189	0.319432	0.0355018
46526	0.0409627	0.753961	3.6108	3.18977	3.36982	3.26101	3.43245	3.35818
46571	-1.77636e-15	1	-5.93283	-5.93283	-5.93283	-5.93283	-5.93283	-5.93283
46598	-0.126199	0.734985	1.29236	0.796408	0.722325	1.52524	1.28893	0.393576
46860	0.168377	0.273715	-1.41915	-1.22376	-1.01741	-1.44103	-1.41915	-1.31744
46902	0.977562	0.275002	-3.52999	-3.52999	-3.06504	-2.71465	-5.93283	-4.34786
47007	-0.088584	0.251548	8.06355	8.16353	7.96069	8.08153	8.15006	8.22178
47152	-1.05912	0.10104	-5.93283	-5.93283	-5.93283	-4.34786	-4.34786	-5.93283
47255	0.0564802	0.676811	2.57541	2.39014	2.30128	2.38135	2.17461	2.55206
47350	-0.208793	0.811634	-4.34786	-4.34786	-2.16788	-4.34786	-3.52999	-2.39882
47415	-1.06626	0.0985078	-5.93283	-5.93283	-5.93283	-5.93283	-4.34786	-4.34786
47674	-1.77636e-15	1	-5.93283	-5.93283	-5.93283	-5.93283	-5.93283	-5.93283
47771	1.15014	0.0566753	-4.10221	-4.34786	-4.34786	-4.34786	-5.93283	-5.93283
47775	0.109138	0.67256	1.6737	1.6737	1.35532	1.10491	1.93046	1.324
47874	-0.142905	0.571885	2.22544	1.88031	1.58437	2.29667	2.14301	1.69297
48042	-0.290334	0.0274877	8.66647	8.73729	8.54621	8.78102	9.06801	8.97128
48113	-0.065124	0.579381	1.11922	1.0304	0.778739	1.06057	0.963218	1.10974
48260	0.440576	0.020911	2.16943	1.91405	1.72135	1.46445	1.55877	1.46681
48485	-1.77636e-15	1	-5.93283	-5.93283	-5.93283	-5.93283	-5.93283	-5.93283
48584	-0.479943	0.0891961	2.05141	2.66632	2.88864	3.07832	2.92783	3.02566
48587	0.542518	0.340673	-4.34786	-5.93283	-5.93283	-5.93283	-5.93283	-5.93283
48928	-0.773094	0.393294	-4.34786	-5.93283	-5.93283	-4.34786	-5.93283	-3.52999
49114	-1.11554	0.315234	-4.10221	-3.06504	-5.93283	-3.52999	-1.91494	-4.34786
49175	0.47058	0.248001	2.00486	2.16483	2.90061	1.69073	1.5174	2.44604
49294	-0.528761	0.107847	-0.288586	-0.679917	-1.11686	0.153346	-0.439312	-0.169933
49346	0.11149	0.640381	-0.0603286	0.138545	0.588754	-0.0116095	-0.0603286	0.393576
49445	0.0710178	0.097951	8.97128	8.96151	8.94133	8.91439	8.91439	8.8323
49616	0.480852	0.00841389	1.33666	1.42437	1.6737	0.931214	0.963218	1.09178
49906	-0.0413939	0.748055	3.79044	3.52894	3.68818	3.9145	3.55055	3.67529
50433	-0.223035	0.073064	2.88864	2.81178	3.04631	3.13738	3.00877	3.2718
50494	0.0194559	0.833154	5.94537	5.7437	5.74295	5.82047	5.88534	5.66946
50989	-0.00873942	0.993543	-5.93283	-3.52999	-5.93283	-5.93283	-5.93283	-3.52999
51148	0.746844	0.180811	-1.88484	-1.33932	-2.16788	-3.52999	-2.16788	-1.9691
51583	-1.77636e-15	1	-5.93283	-5.93283	-5.93283	-5.93283	-5.93283	-5.93283
51592	0.456343	0.679075	-3.52999	-5.93283	-3.06504	-3.52999	-5.93283	-4.34786
51675	1.32708	0.0549056	-4.34786	-3.52999	-4.34786	-5.93283	-5.93283	-4.34786
52029	-0.003953	0.97711	3.0983	3.26527	3.44803	3.22849	3.13099	3.46155
52118	-0.00257761	0.989263	5.21305	5.34644	5.35265	4.913	5.52959	5.46904
52175	0.0767006	0.450625	4.08506	3.98848	4.00783	4.14212	3.85309	3.8612
52191	0.00119853	0.998677	-5.93283	-4.34786	-5.93283	-4.34786	-5.93283	-5.93283
52380	-0.0875442	0.15054	7.36399	7.29918	7.24053	7.45982	7.36331	7.34372
52489	0.671414	0.608429	-2.39882	-5.93283	-5.93283	-5.93283	-4.34786	-5.93283
52559	-0.00666111	0.976069	7.39487	6.91065	6.66569	7.18084	6.91821	6.89565
52570	-0.0378035	0.919652	3.48322	2.88507	2.96035	3.85042	2.84856	2.7676
52860	-0.323287	0.228842	2.31556	2.02434	2.77091	2.92215	2.42572	2.74094
53051	0.457708	0.453028	-0.700352	-0.447901	-0.161345	-2.13348	0.0355018	-0.666555
53100	0.52214	0.353709	-5.93283	-5.93283	-4.34786	-5.93283	-5.93283	-5.93283
53121	-1.77636e-15	1	-5.93283	-5.93283	-5.93283	-5.93283	-5.93283	-5.93283
53240	-0.149771	0.628847	1.21372	1.33059	1.97485	1.21372	1.8482	1.88254
53346	-0.773094	0.393294	-4.34786	-5.93283	-5.93283	-4.34786	-5.93283	-3.52999
53553	-1.77636e-15	1	-5.93283	-5.93283	-5.93283	-5.93283	-5.93283	-5.93283
53629	0.398561	0.273661	1.01434	1.86747	1.03357	0.660042	0.722325	1.324
53642	-1.77636e-15	1	-5.93283	-5.93283	-5.93283	-5.93283	-5.93283	-5.93283
53869	0.08237	0.591742	3.5334	3.50373	3.97903	3.56093	3.57844	3.62628
54083	-0.132566	0.761359	6.73748	6.97354	7.28976	6.27314	7.60925	7.51056
54230	-0.107098	0.625163	2.44604	2.55667	2.03698	2.75071	2.42572	2.1918
54644	-0.33023	0.510937	-2.77508	-2.03791	-2.71465	-3.06504	-1.91494	-1.59485
55047	-0.0177687	0.980481	-5.93283	-5.93283	-4.34786	-5.93283	-4.34786	-5.93283
55070	-1.77636e-15	1	-5.93283	-5.93283	-5.93283	-5.93283	-5.93283	-5.93283
55219	-0.337964	0.234231	-0.889298	-1.11686	-1.77268	-0.798163	-0.924433	-1.01741
55278	-1.77636e-15	1	-5.93283	-5.93283	-5.93283	-5.93283	-5.93283	-5.93283
55634	-0.255656	0.576357	0.181055	1.21372	1.5683	1.69073	1.0102	1.00305
55675	-0.207691	0.204131	5.48934	5.82549	5.9032	5.84256	5.87041	6.12349
55895	-1.06626	0.0985078	-5.93283	-5.93283	-5.93283	-5.93283	-4.34786	-4.34786
56396	1.05973	0.272671	-3.52999	-2.20805	-3.52999	-5.93283	-3.06504	-3.52999
56506	-0.095195	0.506483	5.51207	5.51155	5.43564	5.33334	5.58093	5.82926
56708	-0.157933	0.528684	1.75411	1.79992	2.05431	2.41541	1.6001	2.07923
56883	-0.270641	0.396327	-0.459353	-0.288586	0.0355018	-0.0116095	0.516971	-0.439312
56976	-0.033874	0.750606	5.5311	5.35033	5.56217	5.64613	5.3545	5.54912
57122	-0.108403	0.739776	3.00311	3.02943	2.87973	3.73841	2.90606	2.60418
57149	0.805492	0.373868	-4.34786	-3.52999	-5.93283	-5.93283	-5.93283	-4.34786
57157	0.549882	0.114897	-3.52999	-4.34786	-3.52999	-4.34786	-4.34786	-4.34786
57174	-0.165141	0.734351	-1.74594	-3.06504	-2.39882	-2.39882	-2.67448	-1.59485
57405	-1.77636e-15	1	-5.93283	-5.93283	-5.93283	-5.93283	-5.93283	-5.93283
57616	-0.540499	0.455256	-2.62623	-3.06504	-4.34786	-3.52999	-3.06504	-1.79456
58133	0.52214	0.353709	-5.93283	-5.93283	-4.34786	-5.93283	-5.93283	-5.93283
58435	-0.14238	0.546956	1.66005	1.50074	1.5683	1.56012	2.17461	1.40956
58459	-1.26294	0.333948	-5.93283	-4.34786	-5.93283	-2.13348	-4.34786	-5.93283
58546	-0.124829	0.489006	2.13035	2.2205	2.24559	2.67861	2.10802	2.1918
58885	-0.132959	0.696113	3.4583	3.054	2.813	3.77008	2.73078	3.24861
59200	-0.329882	0.172932	3.87623	4.41147	4.3643	4.24312	4.65769	4.72724
59258	-0.0244903	0.911779	5.77451	5.44506	5.33128	5.92325	5.39249	5.31877
59288	-1.77636e-15	1	-5.93283	-5.93283	-5.93283	-5.93283	-5.93283	-5.93283
59504	-0.244899	0.0416568	9.46061	9.29603	9.13617	9.49755	9.56024	9.5704
59554	-0.303538	0.0907257	1.64366	1.25309	1.24682	1.77001	1.77001	1.52524
59642	0.0323114	0.882341	-1.11686	-0.825673	-1.11686	-0.798163	-0.924433	-1.44103
59816	0.0130774	0.977287	-3.52999	-3.52999	-3.52999	-2.71465	-4.34786	-3.52999
59897	-0.324886	0.182241	3.0643	2.9796	2.93689	3.59122	2.87973	3.49789
60034	-1.77636e-15	1	-5.93283	-5.93283	-5.93283	-5.93283	-5.93283	-5.93283
60231	0.0484807	0.757991	2.68738	3.05737	2.90799	3.02519	2.61459	2.86796
60259	0.0587151	0.552571	3.75324	3.92388	3.97195	3.79386	3.72028	3.95692
60286	-0.117748	0.402256	2.6946	2.48015	2.57541	2.77688	2.86541	2.46223
60465	-0.0519484	0.734399	6.11064	5.90503	5.58714	5.88208	5.87571	6.00553
60466	-0.259488	0.355886	-0.75805	-0.912408	-1.48227	-1.11686	-0.656535	-0.596212
60574	-0.571945	0.229165	-4.10221	-3.52999	-3.06504	-2.39882	-3.06504	-3.52999
60616	0.788515	0.351359	-5.93283	-3.52999	-5.93283	-5.93283	-5.93283	-5.93283
60932	-0.519106	0.353098	-5.93283	-5.93283	-5.93283	-4.34786	-5.93283	-5.93283
60962	-0.210574	0.634825	-0.0116095	1.21372	0.778739	0.393576	1.37678	0.778739
61111	-0.233198	0.492055	-0.825673	-0.0116095	-0.215513	-0.439312	-0.288586	0.344491
61248	-0.119779	0.157323	2.29578	2.36897	2.44604	2.583	2.39784	2.49004
61329	-0.414332	0.1632	-1.41915	-1.22376	-1.9691	-1.01741	-1.41915	-0.912408
61371	-1.77636e-15	1	-5.93283	-5.93283	-5.93283	-5.93283	-5.93283	-5.93283
61438	-0.031207	0.902878	0.399741	1.0304	1.23403	1.06057	0.821212	0.856992
61466	0.00260864	0.997147	-4.34786	-5.93283	-5.93283	-5.93283	-4.34786	-5.93283
61518	0.164334	0.569359	5.31908	5.39652	4.99368	5.11584	5.52017	4.57507
61524	-0.384265	0.335111	-0.0603286	1.17592	0.588754	0.588754	1.21372	1.00305
61590	-0.26437	0.292352	4.74847	5.07872	5.48107	5.62212	5.20227	5.27363
61850	-0.415662	0.3315	-1.01741	-2.43323	-1.33932	-1.01741	-1.27889	-1.20371
61980	-0.113502	0.393638	6.9581	6.66072	6.54728	6.93632	6.78812	6.78478
61981	-1.77636e-15	1	-5.93283	-5.93283	-5.93283	-5.93283	-5.93283	-5.93283
62020	-0.737594	0.338212	-3.06504	-4.34786	-4.34786	-2.39882	-4.34786	-2.71465
62056	0.00119853	0.998677	-5.93283	-4.34786	-5.93283	-4.34786	-5.93283	-5.93283
62197	-1.77636e-15	1	-5.93283	-5.93283	-5.93283	-5.93283	-5.93283	-5.93283
62242	0.0638601	0.807737	-0.0116095	0.823481	0.722325	0.457736	0.399741	0.457736
62243	-0.159907	0.299898	2.88864	3.29202	3.28951	3.27248	3.22891	3.44182
62568	0.694136	0.195573	-0.0116095	0.0869736	-0.347826	0.0355018	-0.583554	-1.79456
62794	-0.502022	0.502128	-4.34786	-5.93283	-5.93283	-4.34786	-5.93283	-4.34786
62811	-0.075992	0.447205	4.60244	4.5293	4.35102	4.59306	4.45527	4.66712
62971	0.119259	0.734779	3.7755	3.52337	3.66878	4.25171	3.34123	3.031
63045	0.0533173	0.650837	4.5794	4.45406	4.31579	4.57196	4.26142	4.36298
63047	-0.180202	0.14675	4.41663	4.59542	4.52199	4.61599	4.57016	4.8874
63149	0.788515	0.351359	-5.93283	-3.52999	-5.93283	-5.93283	-5.93283	-5.93283
63173	-0.201726	0.216466	6.47673	6.59445	6.876	6.74742	6.74997	7.05368
63203	-0.32837	0.339606	1.39486	1.40659	1.08835	2.16246	1.6737	1.04922
63209	-0.539061	0.299346	-2.16788	-0.75805	-1.61891	-1.31744	-1.27889	-0.365862
63236	-0.539909	0.339739	-5.93283	-5.93283	-5.93283	-5.93283	-4.34786	-5.93283
63576	-0.12659	0.40385	0.854587	0.901672	0.722325	0.958924	0.722325	1.18625
63700	-0.0103587	0.944407	6.13592	6.04245	5.63698	5.94923	5.92076	5.98005
63751	-0.0528035	0.811768	2.60418	2.30381	2.43766	2.92215	2.208	2.3924
63851	0.520304	0.354899	-5.93283	-4.34786	-5.93283	-5.93283	-5.93283	-5.93283
63966	0.353494	0.33863	1.11922	1.2762	1.77001	0.457736	1.55877	1.04922
63985	-0.15795	0.588332	0.722325	1.2762	1.68455	1.26938	1.26803	1.59754
64131	-1.77636e-15	1	-5.93283	-5.93283	-5.93283	-5.93283	-5.93283	-5.93283
64237	0.000197246	0.998334	4.37549	4.32264	4.43098	4.50782	4.41663	4.20461
64250	-0.269922	0.493897	0.901672	1.60486	1.86291	2.28868	1.3994	1.48387
64424	-0.0117371	0.860988	5.80216	5.73055	5.59285	5.75156	5.72587	5.68522
64446	-0.0751519	0.428707	4.12055	4.09362	4.02863	3.98395	4.26881	4.21294
64506	-0.506354	0.00101567	-0.205894	-0.288586	-0.161345	0.234551	0.356985	0.26914
64539	-0.205043	0.0759067	3.0643	3.15672	2.83865	3.25109	3.19543	3.23007
64855	-0.134095	0.648938	0.429254	1.23403	1.06432	0.722325	1.33666	1.0304
64903	-0.0980105	0.404137	4.49922	4.70701	4.64214	4.5177	4.82729	4.79082
64996	-0.440538	0.552387	-4.10221	-3.52999	-5.93283	-4.34786	-4.34786	-3.52999
65036	0.0131912	0.925533	4.63162	4.67355	4.51353	4.36749	4.56478	4.84585
65073	0.1914	0.0819941	6.42831	6.60661	6.39917	6.22822	6.20962	6.42186
65282	0.646628	0.227403	-3.06504	-2.43323	-3.06504	-4.34786	-2.67448	-3.52999
65427	-0.128599	0.154881	5.4625	5.3269	5.25152	5.53244	5.37625	5.52232
65646	0.176819	0.550835	0.319432	0.552479	-0.288586	0.350819	-0.161345	-0.11745
65702	-1.77636e-15	1	-5.93283	-5.93283	-5.93283	-5.93283	-5.93283	-5.93283
65765	-1.77636e-15	1	-5.93283	-5.93283	-5.93283	-5.93283	-5.93283	-5.93283
65810	-1.77636e-15	1	-5.93283	-5.93283	-5.93283	-5.93283	-5.93283	-5.93283
65817	0.100767	0.897909	-4.10221	-5.93283	-5.93283	-5.93283	-5.93283	-4.34786
65826	0.194295	0.452121	3.5606	3.49022	3.31666	3.66719	3.33568	2.787
65915	-1.77636e-15	1	-5.93283	-5.93283	-5.93283	-5.93283	-5.93283	-5.93283
66012	-0.653109	0.166812	-1.31744	-1.85475	-1.22376	-0.0668276	-1.01741	-1.31744
66287	0.0575159	0.777553	1.35532	1.70489	2.06805	1.62307	1.65753	1.66005
66312	0.28982	0.326391	-1.11686	-0.679917	-0.656535	-0.896372	-1.59485	-0.825673
66670	-1.77636e-15	1	-5.93283	-5.93283	-5.93283	-5.93283	-5.93283	-5.93283
66771	-0.275199	0.687025	-5.93283	-3.52999	-4.34786	-4.34786	-4.34786	-4.34786
66778	-0.00113444	0.99683	0.998679	0.75081	0.801418	1.35532	0.87033	0.344491
66832	0.0538669	0.921814	-2.77508	-1.69245	-3.52999	-2.71465	-2.39882	-3.06504
66851	0.223537	0.523268	-0.169933	-0.0116095	0.854587	-0.288586	0.0869736	0.173768
66894	-0.417235	0.151871	0.215265	0.722325	1.14753	1.06057	1.03942	1.21372
66970	-1.77636e-15	1	-5.93283	-5.93283	-5.93283	-5.93283	-5.93283	-5.93283
67039	-0.283363	0.0775258	1.95681	2.18666	2.32419	2.26859	2.50808	2.52964
67058	-1.77636e-15	1	-5.93283	-5.93283	-5.93283	-5.93283	-5.93283	-5.93283
67113	-0.14857	0.177073	3.48322	3.28616	3.29835	3.61445	3.54177	3.36123
67244	0.0293763	0.853505	3.86908	3.98848	3.46155	3.82104	3.70483	3.70863
67301	-1.77636e-15	1	-5.93283	-5.93283	-5.93283	-5.93283	-5.93283	-5.93283
67442	-0.519106	0.353098	-5.93283	-5.93283	-5.93283	-4.34786	-5.93283	-5.93283
67467	0.543981	0.465961	-4.34786	-4.34786	-5.93283	-4.34786	-5.93283	-5.93283
67504	-0.361237	0.00561298	3.00311	3.04061	3.21624	3.50616	3.36515	3.4722
67514	-0.674269	0.0129813	1.30822	1.2762	1.29236	1.6001	2.09971	2.1918
67622	-0.065343	0.21499	5.77034	5.8052	5.86252	5.87461	5.93537	5.82254
67647	-1.77636e-15	1	-5.93283	-5.93283	-5.93283	-5.93283	-5.93283	-5.93283
67728	-0.0333766	0.592281	4.12762	4.0792	4.11935	4.21733	4.03896	4.17307
67740	0.696539	0.236975	-2.77508	-3.52999	-3.06504	-2.71465	-4.34786	-4.34786
67788	0.788515	0.351359	-5.93283	-3.52999	-5.93283	-5.93283	-5.93283	-5.93283
67798	-0.175807	0.497675	0.650502	1.10491	1.30822	1.24682	0.87033	1.46681
67908	-0.138021	0.669925	1.6737	1.17592	0.625553	1.58437	1.24357	1.09178
67939	-0.166461	0.886348	-4.10221	-3.06504	-5.93283	-3.06504	-5.93283	-3.52999
68050	-0.525948	0.348668	-5.93283	-5.93283	-5.93283	-5.93283	-5.93283	-4.34786
68130	0.130642	0.52526	2.12518	1.86747	2.01663	2.19349	1.5174	1.92624
68135	0.537145	0.602129	-4.34786	-5.93283	-3.52999	-5.93283	-5.93283	-3.52999
68142	-1.77636e-15	1	-5.93283	-5.93283	-5.93283	-5.93283	-5.93283	-5.93283
68176	0.181969	0.629702	-1.59485	-2.43323	-1.33932	-2.13348	-2.16788	-1.59485
68318	-0.360285	0.0991005	-1.59485	-1.69245	-1.9691	-1.44103	-1.14244	-1.59485
68589	0.520304	0.354899	-5.93283	-4.34786	-5.93283	-5.93283	-5.93283	-5.93283
68590	-1.77636e-15	1	-5.93283	-5.93283	-5.93283	-5.93283	-5.93283	-5.93283
68770	-0.153406	0.53148	-0.656535	-0.51412	-0.583554	-0.179953	-0.210704	-0.912408
68872	-1.20145	0.267011	-2.77508	-5.93283	-5.93283	-3.06504	-3.52999	-4.34786
68884	-0.108533	0.108421	3.13099	3.17725	3.23627	3.23627	3.36515	3.26527
68908	0.163816	0.565128	2.14112	2.27907	2.87973	2.60418	1.97096	2.23555
69320	0.0611799	0.547154	3.24165	3.29751	3.23007	3.02995	3.18551	3.3682
69411	-0.131928	0.813149	-1.59485	-1.22376	-0.912408	-2.13348	-1.01741	-0.231707
69610	-1.20095	0.166764	-4.10221	-4.34786	-4.34786	-4.34786	-3.06504	-1.79456
69668	-0.0332378	0.756085	2.6946	2.8174	3.02519	2.82494	2.96077	2.84411
69791	-1.77636e-15	1	-5.93283	-5.93283	-5.93283	-5.93283	-5.93283	-5.93283
69794	-0.102735	0.734595	0.662547	0.926842	1.06432	0.457736	1.46445	1.00305
69921	-0.355283	0.263715	5.01668	5.12368	4.85074	4.75042	5.65278	5.64505
69955	-0.106757	0.510667	2.49143	2.54601	2.40141	2.3536	2.51741	2.88706
70136	-0.0827854	0.748388	-0.439312	-0.679917	-1.01741	-0.896372	-0.743902	-0.231707
70161	-1.77636e-15	1	-5.93283	-5.93283	-5.93283	-5.93283	-5.93283	-5.93283
70453	-0.479313	0.401487	-0.940469	-0.75805	0.429254	-0.631852	0.0355018	0.722325
70567	-1.77636e-15	1	-5.93283	-5.93283	-5.93283	-5.93283	-5.93283	-5.93283
70585	-0.0985159	0.704805	1.58437	1.60486	1.62037	1.98102	1.95781	1.16195
70599	-1.77636e-15	1	-5.93283	-5.93283	-5.93283	-5.93283	-5.93283	-5.93283
70659	-1.77636e-15	1	-5.93283	-5.93283	-5.93283	-5.93283	-5.93283	-5.93283
70698	0.323419	0.050246	2.77571	3.02943	3.05503	2.60887	2.4673	2.81178
70707	0.471903	0.120993	0.519767	0.332611	-0.0603286	0.153346	-0.161345	-0.596212
70717	0.16234	0.308845	3.58664	3.69793	3.98822	3.46403	3.53024	3.78701
70728	-0.0486093	0.7052	4.08112	3.92388	4.01556	4.29073	4.00757	3.87319
70737	-0.155732	0.247793	7.7048	7.93801	8.07448	7.95623	8.02909	8.19811
70743	-1.77636e-15	1	-5.93283	-5.93283	-5.93283	-5.93283	-5.93283	-5.93283
70746	-1.77636e-15	1	-5.93283	-5.93283	-5.93283	-5.93283	-5.93283	-5.93283
70788	0.127649	0.136661	6.10068	6.11519	6.27314	5.93418	6.0949	6.07481
70791	-0.00572754	0.984202	4.81305	4.19698	3.87426	4.54916	4.23932	4.12945
70801	-0.209926	0.678312	-3.06504	-2.71465	-2.16788	-3.06504	-1.59485	-2.71465
70806	0.0117291	0.885788	6.84355	7.00272	6.90241	6.81154	7.03522	6.86516
70809	0.146889	0.235332	6.78642	6.8061	6.49658	6.42621	6.59961	6.6224
70816	0.09084	0.392602	6.05796	5.86105	5.86874	6.00359	5.75014	5.76609
70849	-0.999365	0.146338	-4.10221	-3.06504	-4.34786	-1.91494	-3.06504	-3.52999
70864	0.0474624	0.551057	5.18022	5.29138	5.28979	5.10818	5.17269	5.33623
70868	-0.297828	0.617709	3.70509	4.65128	4.40258	3.65862	5.54511	4.40924
70872	-0.0111772	0.958586	5.60383	6.06782	6.08438	5.68529	6.2321	5.86092
70876	0.371158	0.232783	4.06887	3.82681	3.64143	2.96035	3.53376	3.92955
70892	-0.103253	0.557185	5.43939	5.39804	5.45707	5.21356	5.83357	5.55078
70893	-0.172391	0.847136	-1.50634	-2.20805	-4.34786	-3.06504	-1.74594	-2.71465
70896	0.0651521	0.733281	6.58811	6.27734	6.12763	6.53235	6.24075	6.02931
70905	0.0791455	0.291199	6.77685	6.91964	6.83	6.66466	6.85686	6.76604
70928	-0.317542	0.198381	5.5356	5.87542	5.9758	5.7213	6.31085	6.29751
70929	0.00189462	0.989852	5.15761	4.89884	5.00503	5.2782	4.96678	4.817
70954	-0.234389	0.253638	0.684412	0.852318	1.12828	0.823481	1.26803	1.25679
70966	0.937084	0.240848	-4.34786	-3.52999	-3.06504	-5.93283	-4.34786	-3.52999
70981	-0.371913	0.142986	1.37678	1.83275	1.70957	2.38135	1.88031	1.77001
70982	1.14925	0.102655	-4.10221	-5.93283	-4.34786	-5.93283	-5.93283	-5.93283
71002	-0.0345577	0.918453	4.74847	5.3759	5.30421	4.57973	5.46728	5.46728
71006	-0.188326	0.41046	4.79112	4.65967	4.42624	5.20439	4.73786	4.50812
71038	-0.180934	0.241545	6.66816	6.45626	6.51423	6.98719	6.66213	6.5348
71039	0.080585	0.244769	6.38095	6.48504	6.5251	6.33367	6.34271	6.47209
71042	-0.562766	0.00417658	5.8099	5.54057	5.45014	6.2092	6.05144	6.23408
71044	-0.263276	0.13748	1.39486	1.12304	1.17448	1.71882	1.5174	1.25679
71046	0.284353	0.0534073	3.10749	3.20866	3.27013	2.70656	2.92783	3.09368
71052	-0.164874	0.280544	2.84527	2.87749	2.85948	3.15503	3.18551	2.73384
71053	-0.387614	0.762638	-2.77508	-5.93283	-5.93283	-4.34786	-5.93283	-3.06504
71070	-0.262235	0.0278374	4.60244	4.65128	4.82096	5.06419	4.85712	4.94048
71077	-1.77636e-15	1	-5.93283	-5.93283	-5.93283	-5.93283	-5.93283	-5.93283
71086	-0.0948599	0.566315	3.19164	3.39725	3.27013	3.06338	3.53712	3.53409
71087	-0.149801	0.280949	7.79494	7.59995	7.63572	8.06355	7.75424	7.66347
71096	-0.0183252	0.864159	6.89688	6.88863	6.6133	6.88433	6.86767	6.70245
71098	0.152861	0.683166	8.40974	8.82461	9.30914	8.11136	9.04568	8.92349
71136	0.188344	0.0288333	4.76244	4.68121	4.76087	4.52439	4.46501	4.65206
71143	0.165733	0.236789	6.15509	5.90888	6.06782	6.03553	5.65962	5.94537
71152	0.144843	0.154677	6.56526	6.63036	6.57457	6.61927	6.40093	6.31627
71155	0.386756	0.169538	0.594479	0.229208	0.0811087	-0.503189	0.0355018	0.215265
71160	-1.77636e-15	1	-5.93283	-5.93283	-5.93283	-5.93283	-5.93283	-5.93283
71180	0.301444	0.0798785	3.65801	3.4583	3.56455	3.53981	3.11025	3.13505
71186	0.0502196	0.655341	4.90382	5.14968	5.17051	4.87417	5.0852	5.10794
71189	-0.0269185	0.856984	4.25354	3.83553	3.84099	3.92261	3.96013	4.13569
71195	-0.136378	0.0864941	3.79471	3.75613	3.78476	3.79787	4.00468	3.93993
71199	0.121989	0.8193	0.684412	1.77001	1.8482	0.457736	1.6737	1.74504
71209	-0.0673846	0.754525	6.16837	6.72566	6.74184	6.36608	6.72253	6.74368
71222	-0.0760864	0.515132	7.61983	7.90952	7.97469	7.83759	7.90283	7.99069
71227	-0.0486291	0.872209	5.19778	4.76274	4.51353	5.33215	4.82096	4.48023
71234	0.161858	0.0933832	6.91011	7.00599	7.00497	6.9348	6.67231	6.82917
71263	-1.77636e-15	1	-5.93283	-5.93283	-5.93283	-5.93283	-5.93283	-5.93283
71272	-0.132307	0.115427	5.59424	5.76146	5.78718	5.87918	5.88813	5.76976
71275	-0.0321254	0.824824	4.38063	4.68599	4.74893	4.52439	4.55367	4.82867
71278	0.146014	0.254964	4.49048	4.60345	4.72257	4.43605	4.29511	4.64715
71280	0.196979	0.175959	7.71817	7.95004	7.62544	7.45792	7.75881	7.48484
71299	-0.217658	0.503393	0.568181	-0.0116095	-0.51412	0.0811087	0.188128	0.457736
71301	-0.201834	0.056958	5.31908	5.33128	5.5587	5.65116	5.53186	5.63127
71304	-0.390915	0.00402065	6.08087	6.28354	6.29024	6.56147	6.568	6.69597
71310	-0.24526	0.315823	3.70863	3.4583	3.03187	3.92911	3.48178	3.53784
71311	-0.0967731	0.0985623	6.06899	6.04382	5.9758	6.19572	6.10489	6.07962
71332	0.0676243	0.692354	4.4933	4.23129	4.18336	4.5293	4.14235	4.04253
71338	-0.023701	0.895215	4.38621	4.78501	4.74361	4.39316	4.85809	4.72273
71357	-0.187693	0.144733	4.70644	4.56051	4.53759	4.99835	4.6896	4.68569
71363	-0.274364	0.180844	3.94617	3.83218	4.37435	4.5177	4.16598	4.29439
71384	-0.121481	0.405764	4.06887	4.09641	4.0018	4.42839	3.93677	4.17307
71390	0.0450084	0.467781	6.49337	6.39008	6.5411	6.49106	6.36598	6.43358
71394	-0.744699	0.528502	-1.9691	-5.93283	-2.71465	-3.52999	-2.39882	-2.39882
71409	0.0196648	0.809799	5.47864	5.62102	5.71426	5.60251	5.50348	5.64763
71414	0.321957	0.0366537	1.30822	1.37374	1.14753	1.1446	0.901672	0.823481
71417	-0.0623641	0.536469	1.45006	1.57126	1.58437	1.75411	1.57126	1.46681
71442	0.113125	0.265011	1.32725	1.45006	1.24682	1.30822	1.10103	1.27984
71448	0.0187875	0.984283	-4.34786	-5.93283	-3.52999	-4.34786	-5.93283	-3.52999
71453	-0.223611	0.197558	8.76828	8.92824	9.16274	9.41333	9.0374	9.07934
71457	0.139313	0.325942	5.63698	5.54669	5.35364	5.529	5.43598	5.15709
71460	0.00995106	0.932888	5.56818	5.42156	5.2406	5.5352	5.27395	5.39744
71466	-0.0318943	0.74741	6.68281	6.45784	6.44003	6.66029	6.44405	6.57499
71495	0.0679972	0.641271	4.03469	4.17498	3.84887	3.74939	4.14938	3.95032
71506	0.0370833	0.799099	8.6379	8.86738	8.92824	8.57127	8.75407	8.99576
71508	0.670776	0.426437	-3.52999	-4.34786	-3.06504	-5.93283	-3.52999	-3.52999
71512	-0.106993	0.805807	4.03201	4.7961	4.5584	3.82783	5.19584	4.65537
71517	-0.164353	0.0898474	4.2188	4.21693	4.35972	4.35511	4.37346	4.55922
71541	-0.075874	0.695405	6.23871	6.14568	5.61987	6.00816	6.03324	6.19447
71546	0.0476525	0.650651	5.93629	5.86833	6.11634	5.90242	5.8075	6.06899
71547	-0.0247068	0.786034	5.20775	5.44506	5.23303	5.40518	5.326	5.22718
71550	-0.038531	0.809967	5.57016	5.61876	5.89646	5.98976	5.54808	5.66516
71556	-0.0505291	0.857806	4.25065	4.88225	4.60667	4.19163	4.98992	4.69115
71561	-0.0444782	0.640676	5.46473	5.6365	5.64708	5.75695	5.49885	5.62614
71562	-0.0781755	0.536832	3.99137	4.06075	3.97195	4.33599	3.96946	3.95692
71563	-0.0450755	0.826406	4.51026	4.13475	3.98603	4.08301	4.14235	4.54916
71565	-0.102884	0.242453	5.08669	5.07076	4.95132	5.013	5.15499	5.24927
71570	-0.0495422	0.753782	4.60667	4.86343	4.871	4.5703	4.86678	5.04566
71585	0.00565278	0.949307	3.17689	3.04683	3.04631	3.23627	3.00877	3.01378
71586	0.123131	0.148996	4.78347	4.67355	4.58742	4.46831	4.62332	4.58398
71596	0.0932076	0.482817	5.18287	5.04397	5.32345	4.89909	5.10076	5.26944
71600	-0.335985	0.161206	5.2297	5.11461	5.36039	5.98662	5.44705	5.28383
71601	-0.058241	0.733595	5.87487	6.15762	6.13061	5.85787	6.38604	6.08607
71605	0.0746272	0.417113	5.74126	5.6822	5.66516	5.77999	5.60677	5.48018
71613	-0.141029	0.273659	8.4275	8.26857	8.29033	8.69883	8.35034	8.36163
71616	0.0798383	0.271874	1.68455	1.62307	1.72135	1.50074	1.65753	1.62846
71621	0.128447	0.387751	2.56085	2.66632	2.20979	2.26859	2.37968	2.40379
71625	-0.0519489	0.694652	7.05019	6.88991	6.64282	6.90481	7.03268	6.80193
71631	0.0316634	0.612611	5.60235	5.71946	5.70721	5.73466	5.596	5.60315
71632	0.0253292	0.874513	6.33627	6.21134	5.95387	5.9152	6.16979	6.34127
71636	-0.235799	0.0454476	4.16165	4.13475	4.17603	4.21545	4.43816	4.52405
71648	0.0733275	0.88645	5.61337	6.36726	7.1672	5.73215	6.42394	6.75832
71653	-0.0392344	0.831034	2.84527	2.43766	2.45743	2.85948	2.39166	2.62463
71672	0.170671	0.088817	4.87933	4.91147	4.83584	4.53974	4.79878	4.77315
71689	0.171791	0.522401	4.82729	4.84298	4.50212	4.03827	4.80847	4.80364
71696	0.0315484	0.58367	8.05658	8.04648	8.19555	8.09048	8.02035	8.09314
71712	0.0570257	0.680044	0.552479	0.796408	0.722325	0.489086	0.547014	0.856992
71741	0.0164301	0.891809	4.53015	4.49991	4.68371	4.4181	4.47261	4.77315
71747	-0.123085	0.451224	-0.169933	-0.231707	-0.447901	-0.351834	-0.210704	0.0869736
71764	0.0077875	0.970912	1.69297	1.57126	1.27286	1.87138	1.26803	1.39486
71766	0.882122	0.00246583	1.46824	1.40659	1.29236	0.722325	0.627626	0.173768
71779	-0.121459	0.560906	2.93491	3.12654	2.79957	2.80452	3.4411	2.96837
71797	-0.152332	0.510102	5.10887	5.36906	5.25881	4.96017	5.70992	5.51274
71826	0.0168885	0.955602	0.138545	0.588754	-0.0116095	0.75081	-0.0603286	-0.0116095
71840	-0.1956	0.221648	0.138545	0.0355018	0.356985	0.588754	0.229208	0.307988
71845	0.655189	0.0247663	1.96995	2.492	2.59051	1.77001	1.79992	1.50074
71861	-0.236627	0.266384	0.854587	0.625553	0.319432	1.03357	0.901672	0.588754
71879	-0.00806313	0.973244	5.87651	5.87705	5.91948	6.24737	5.41015	6.04821
71903	-0.138063	0.293891	7.43511	7.44649	7.41272	7.8073	7.53201	7.36974
71907	0.0595025	0.535292	6.56846	6.52839	6.80277	6.63619	6.49337	6.59187
71912	-0.325161	0.173629	0.568181	0.94704	1.08835	1.50074	0.983194	1.09178
71916	0.083352	0.632666	5.20974	5.2607	5.22907	5.51307	4.96919	4.97221
71919	-0.124038	0.291426	4.94798	5.04218	5.26668	5.32114	5.10818	5.19906
71935	0.353382	0.17683	6.84162	7.32265	7.10575	6.74539	7.08702	6.37368
71950	-0.0191927	0.774466	5.21878	5.12008	5.00701	5.10223	5.148	5.15499
71958	0.278503	0.447131	3.33081	2.96227	2.52571	3.24361	2.49478	2.26723
71962	-0.0858053	0.735442	5.50862	5.18252	4.96729	5.65962	5.34321	4.92136
71969	-0.0564035	0.595691	4.95322	5.0531	4.97121	4.84585	5.17757	5.11873
71974	-0.0883036	0.604396	3.4583	3.35736	3.32757	3.79386	3.21779	3.40655
71980	0.0326466	0.608279	7.4979	7.46756	7.40146	7.48949	7.46295	7.31672
71986	0.0334654	0.509121	5.83734	5.94505	5.86395	5.90663	5.81004	5.82926
71989	0.237436	0.0856561	3.55458	3.64693	3.68175	3.37575	3.20282	3.59377
72005	-0.00888742	0.974076	8.92824	8.75919	9.21273	9.29603	8.47024	9.16274
72018	0.0679108	0.825475	-0.700352	-1.01741	-1.33932	-0.798163	-0.852158	-1.59485
72027	0.0161248	0.737181	3.65306	3.55587	3.66349	3.63128	3.59254	3.60169
72057	0.2475	0.178512	5.41148	5.35033	5.54453	4.85454	5.35692	5.34693
72064	-1.77636e-15	1	-5.93283	-5.93283	-5.93283	-5.93283	-5.93283	-5.93283
[truncated: 12,096 more rows]

## Sheet: PCA motif
Appearances of the PCA motif in the genome sequence of T. harzianum CBS226.95 outside of the PCA cluster on scaffold 23.
The genome sequence was screened using SeqKit, allowing three mismatches.
scaffold	strand	start	end	matched sequence 5'-3'	gene in vicinity	position	function
scaffold_1	+	742737	742752	CGAGCAAATTTCCTCG	Triha1_502278	upstream	conserved hypothetical protein
scaffold_1	-	742737	742752	CGAGGAAATTTGCTCG
scaffold_2	-	3488783	3488798	TGCGCAAACTTCCACG	Triha1_312423	upstream	O-methyltransferase
scaffold_2	+	3488783	3488798	CGTGGAAGTTTGCGCA
scaffold_2	+	3816016	3816031	CGCGGAATATTCCGCA	Triha1_76304	upstream	putative nucleoside phosphorylase
scaffold_2	-	3816016	3816031	TGCGGAATATTCCGCG
scaffold_5	+	970725	970740	CGCGGAAATTTGCTCA	Triha1_84164	upstream	hypothetical protein
scaffold_5	-	970725	970740	TGAGCAAATTTCCGCG
scaffold_5	-	1747718	1747733	TGTGCAATCTTGCGCA	Triha1_83231	inside ORF	contains Not1 motif, putative negative regulator of transcription
scaffold_5	+	1747718	1747733	TGCGCAAGATTGCACA
scaffold_5	+	2360023	2360038	TGCGCAATCTTCCACA	Triha1_494518	inside ORF	putative transcription factor
scaffold_5	-	2360023	2360038	TGTGGAAGATTGCGCA
scaffold_6	-	71367	71382	CGAGGAATTTTGCTCG	Triha1_85551	inside ORF	putative transcription factor
scaffold_6	+	71367	71382	CGAGCAAAATTCCTCG
scaffold_6	+	1379804	1379819	TGCGCAAGATTGCTCG	Triha1_85912	inside ORF	mitochondrial substrate carrier
scaffold_6	-	1379804	1379819	CGAGCAATCTTGCGCA
scaffold_8	+	952931	952946	TGAGCAAGCTTGCTCA	Triha1_496642	downstream	conserved hypothetical protein
scaffold_8	-	952931	952946	TGAGCAAGCTTGCTCA
scaffold_13	+	278204	278219	TGTGGAAGTTTGCTCG	Triha1_19562	upstream	related to translation elongation factor 1alpha
scaffold_13	-	278204	278219	CGAGCAAACTTCCACA
scaffold_16	+	52384	52399	TGCGGAAAATTCCGCG	Triha1_512513	upstream	hypothetical protein
scaffold_16	-	52384	52399	CGCGGAATTTTCCGCA
scaffold_33	+	91784	91799	TGCGGAAATTTCCACA	Triha1_514170	inside ORF	Ankyrin domain protein
scaffold_33	-	91784	91799	TGTGGAAATTTCCGCA
scaffold_39	+	36931	36946	TGCGGAATATTGCACA	Triha1_129815	inside ORF	hypothetical protein
scaffold_39	-	36931	36946	TGTGCAATATTCCGCA
